# Supplementary material
Source: PubMed Central journal article supplement (PMC6648810)
Supplement: ao9b00833_si_001.pdf [file ao9b00833_si_001.pdf]

## **Electronic Supplementary Information (ESI)**

### **Iodine Mediated Oxidative Rearrangement of $\alpha,\beta$ -Unsaturated Diaryl Ketones : A Facile Access to 1,2-Diaryl Diketones**

Ajay H. Bansode<sup>††</sup> and Gurunath Surayvanshi<sup>\*††</sup>

*†Chemical Engineering & Process Development Division, CSIR-National Chemical Laboratory,*

*Dr. Homi Bhabha Road, Pune, Maharashtra, India- 411008.*

*‡Academy of Scientific and Innovative Research (AcSIR), New Delhi 110 025, India*

\*Corresponding author: Tel.: +91 20 25902547, Fax: +91 20 25902676

e-mail: [gm.suryavanshi@ncl.res.in](mailto:gm.suryavanshi@ncl.res.in)

#### **Table of Contents:**

| <b>S. No.</b> | <b>Contents</b>                                                           | <b>Page No.</b> |
|---------------|---------------------------------------------------------------------------|-----------------|
| 1             | GC-MS Analysis                                                            | S2-S4           |
| 2             | <sup>1</sup> H and <sup>13</sup> C NMR spectra of 1,2-Diaryl Diketones    | S5-S32          |
| 3             | <sup>1</sup> H and <sup>13</sup> C NMR spectra of Transformation compound | S33-S38         |
| 4             | <sup>1</sup> H and <sup>13</sup> C NMR spectra of Fenflumizol             | S39             |
| 5             | Characterization Data of $\alpha,\beta$ -Unsaturated Ketones              | S40-S45         |
| 6             | References                                                                | S45-S46         |
| 7             | <sup>1</sup> H spectra of $\alpha,\beta$ -Unsaturated Ketones             | S47-S62         |

# 1. GS-MS Analysis:

## 1.1. GC-MS analysis of standard HCOOH:

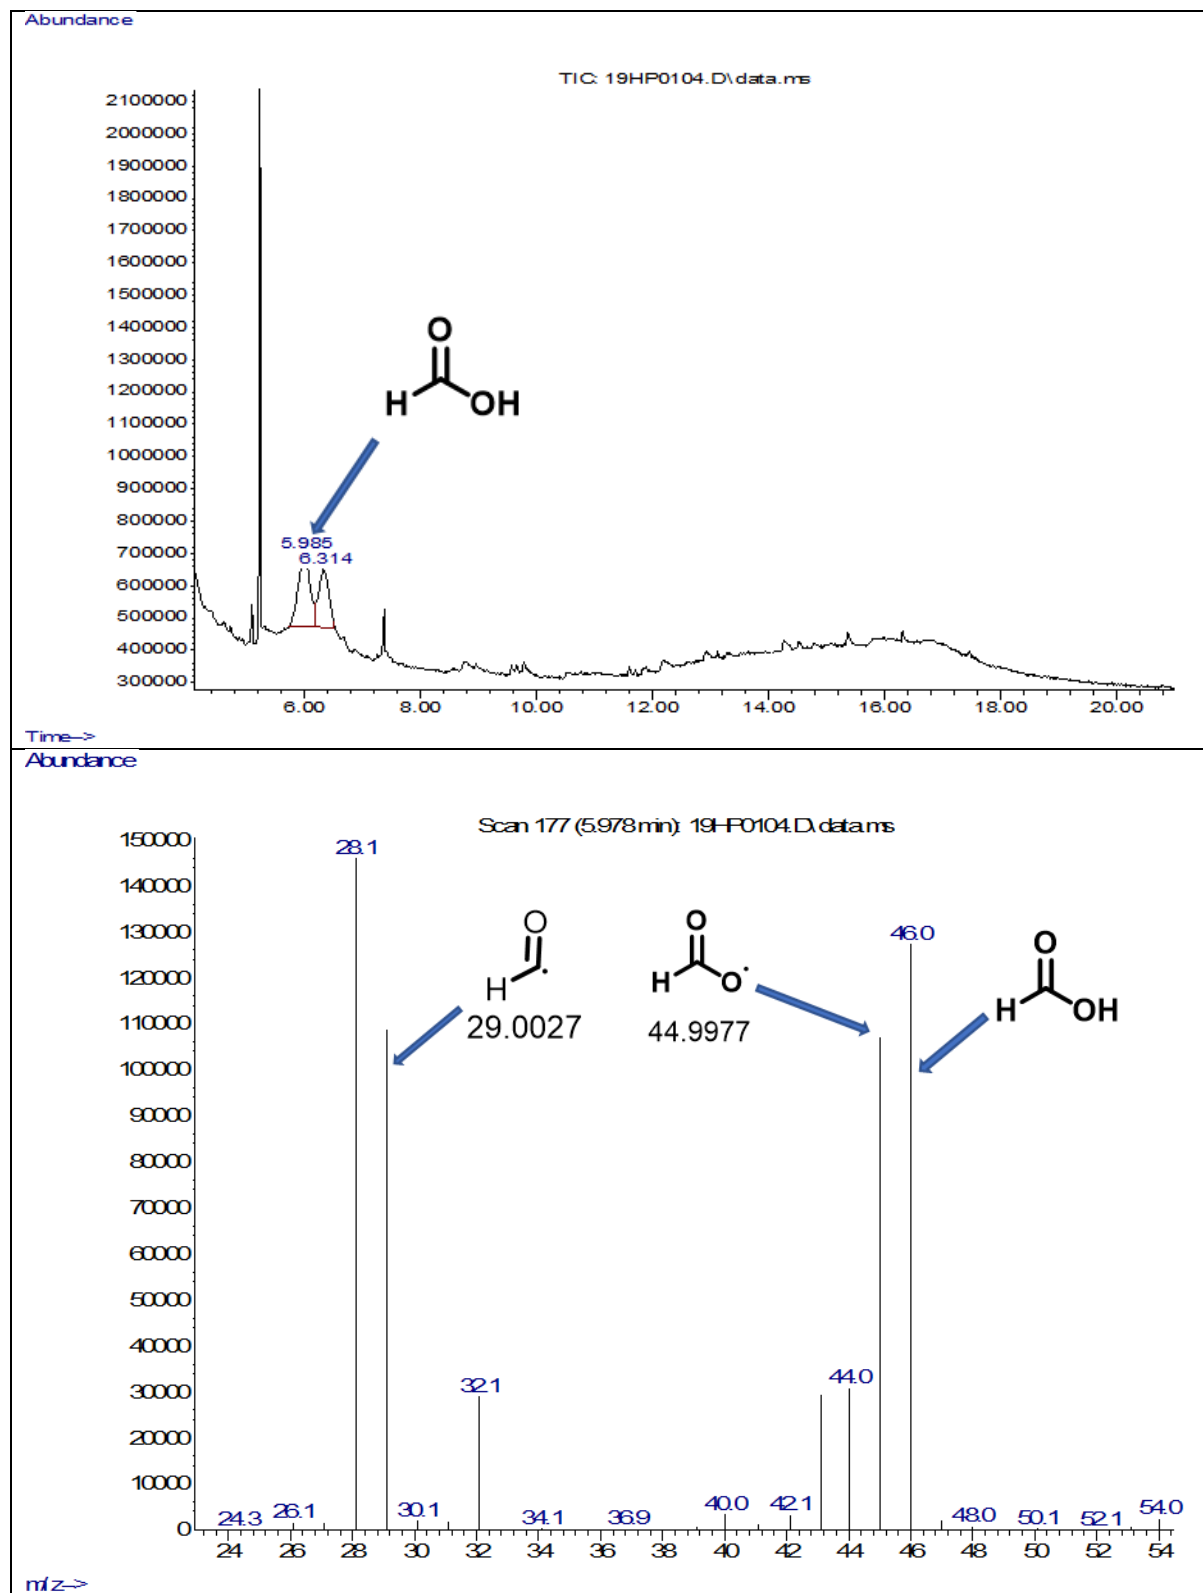

Figure S1. GC-MS Analysis of Standard Formic Acid.

## 1.2. GC-MS Analysis of Reaction Mixture:

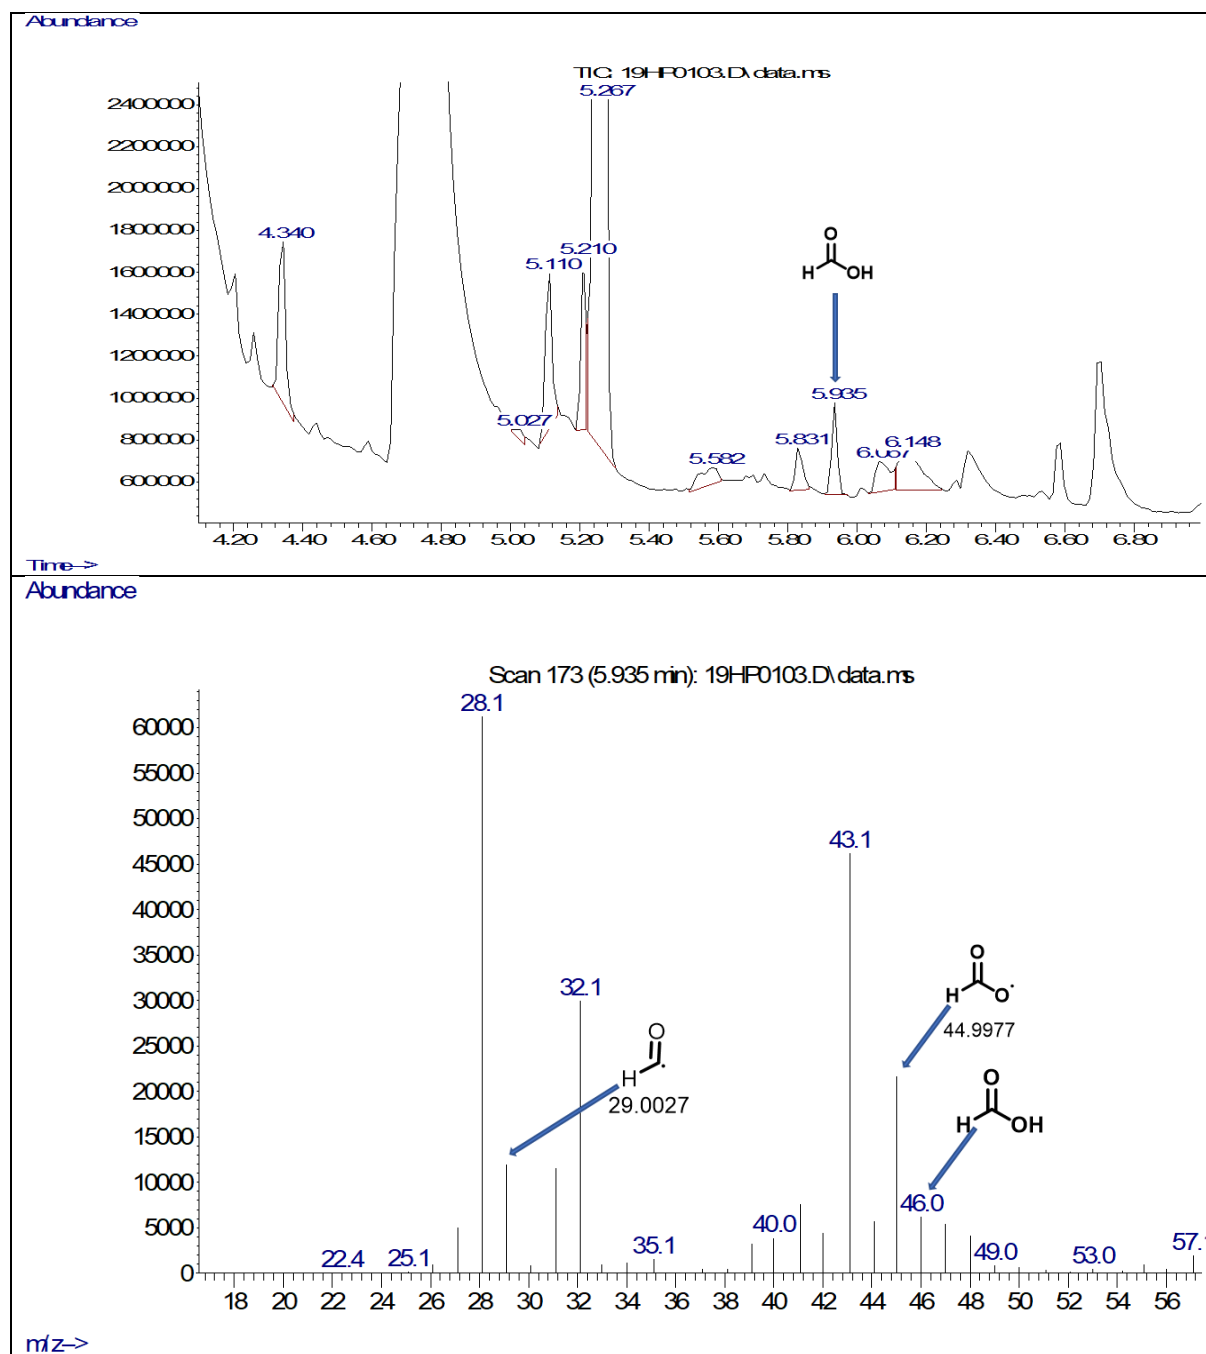

Figure S2. GC-MS Analysis of Reaction Mixture.

The GC-MS analysis was done using Agilent 7890A GC coupled with a mass detector. The injector and detector were operated at 250 °C, respectively. The sample (2 µL) injected in the splitless mode (30 s), and the oven temperature programmed as follows: 40 °C for 0 min, raised to 150 °C (10 °C/min), raised to 250 °C (20 °C/min). The GC-MS analysis of a standard sample of formic acid was carried out. The peak at 5.985 shows mass 46 m/z which corresponds to formic acid (**Figure S1**). Similar GC-MS analysis was carried out on reaction mixture, and a peak at 5.935 showed mass 46 m/z which corresponds to formic acid formed as a by-product in reaction (**Figure S2**).

**<sup>1</sup>H and <sup>13</sup>C NMR:**

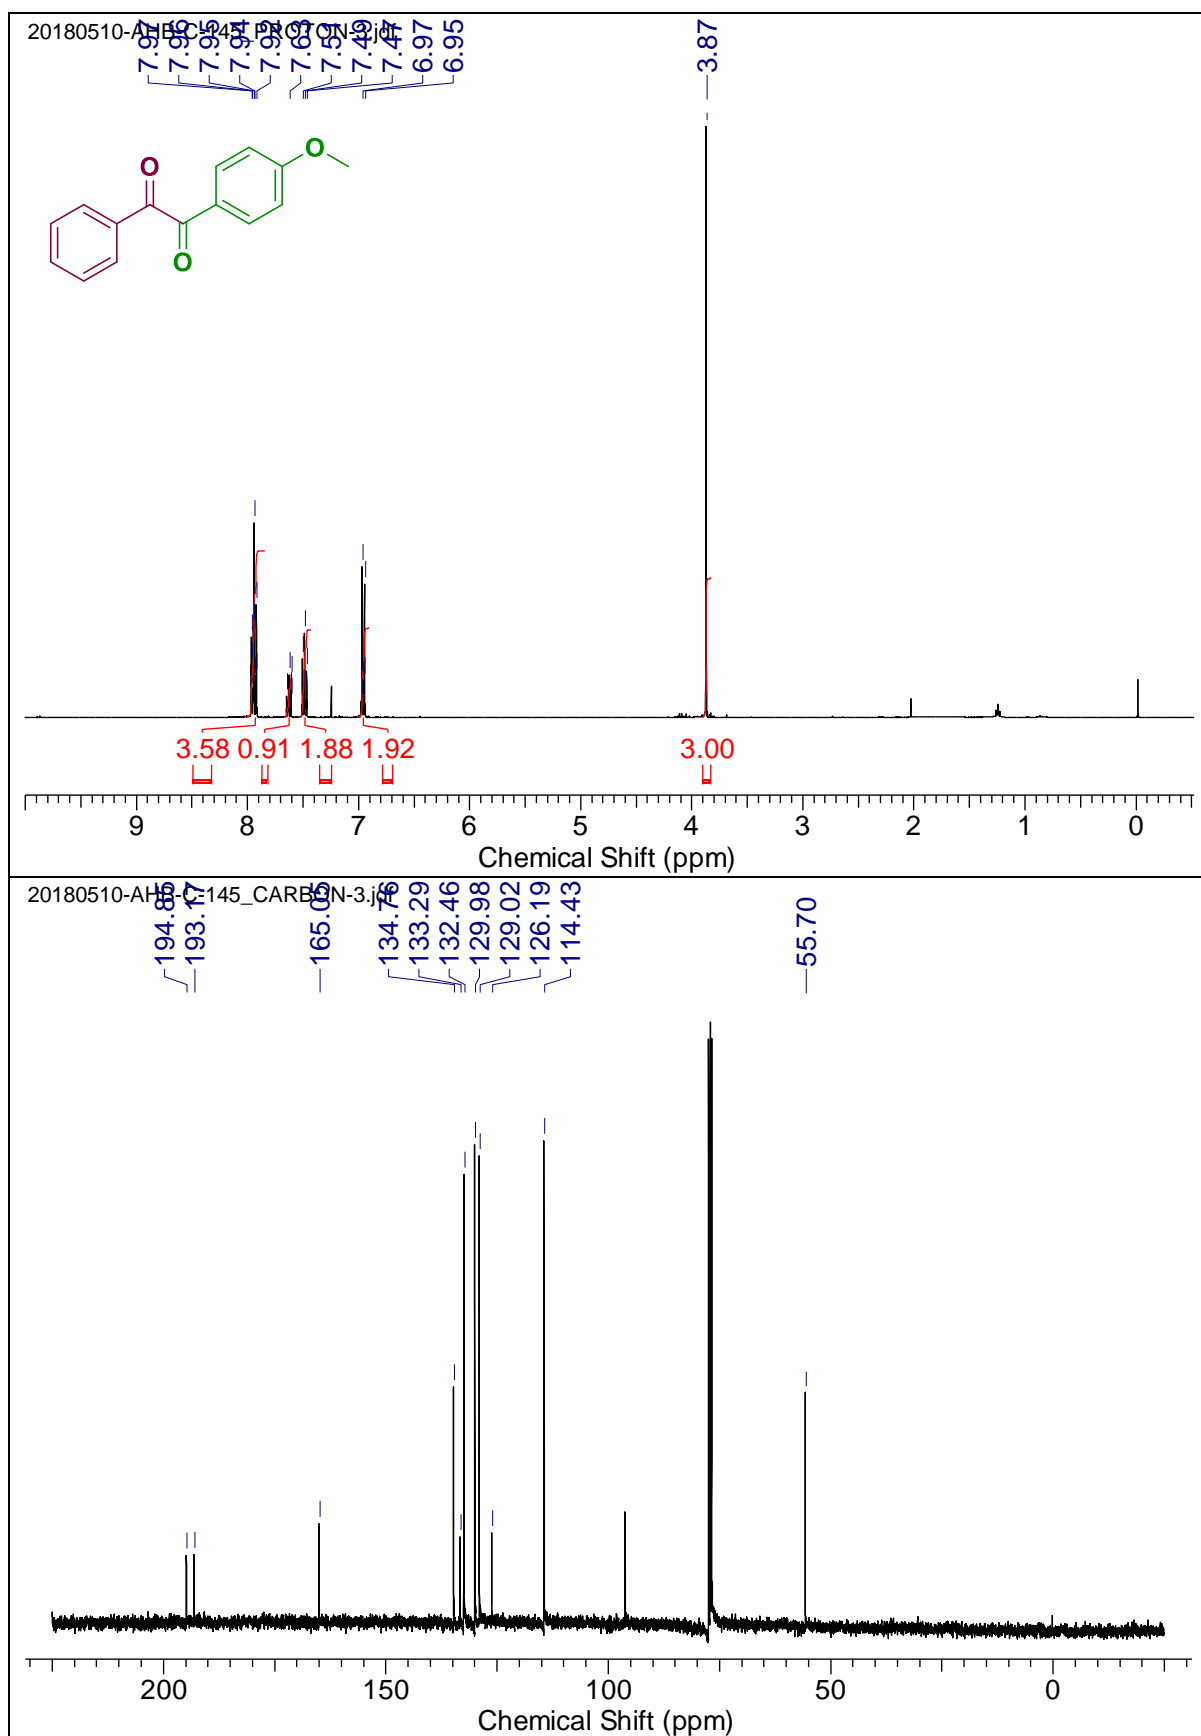

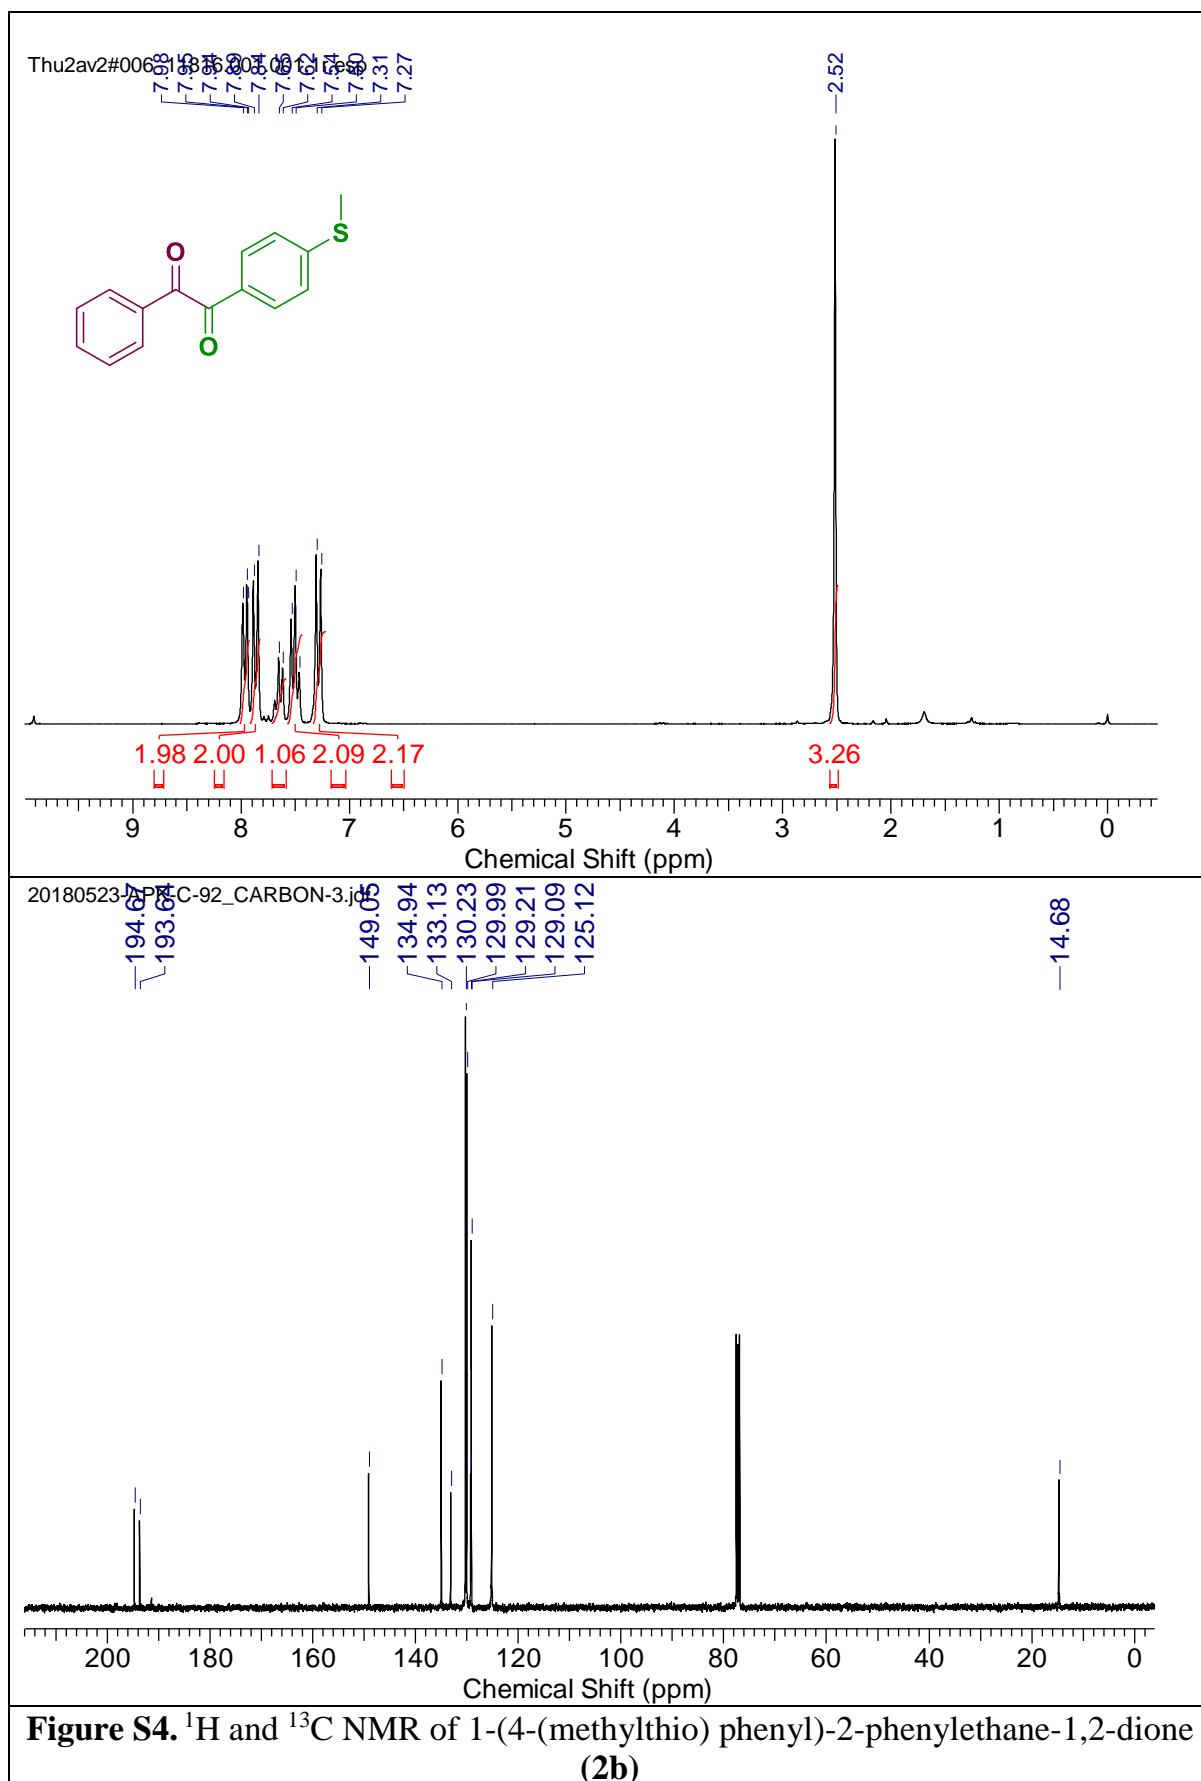

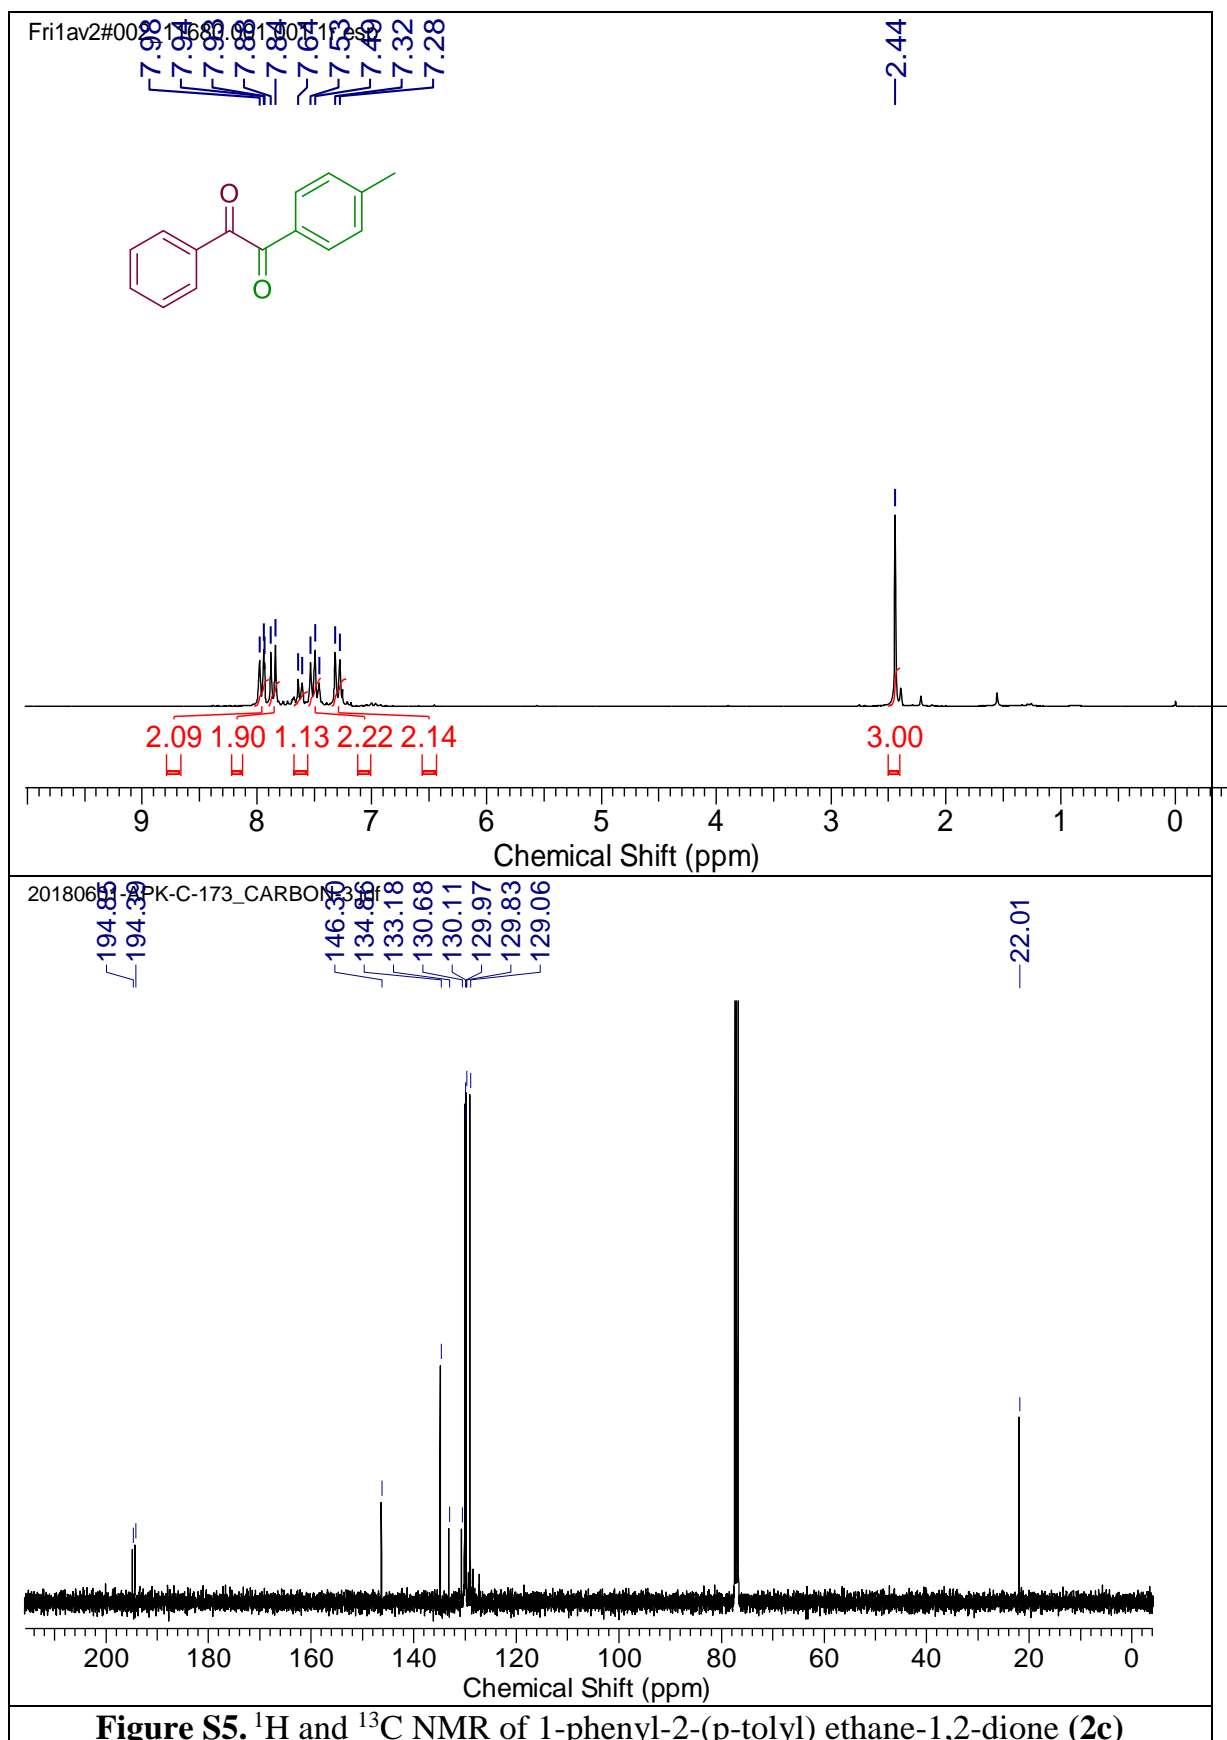

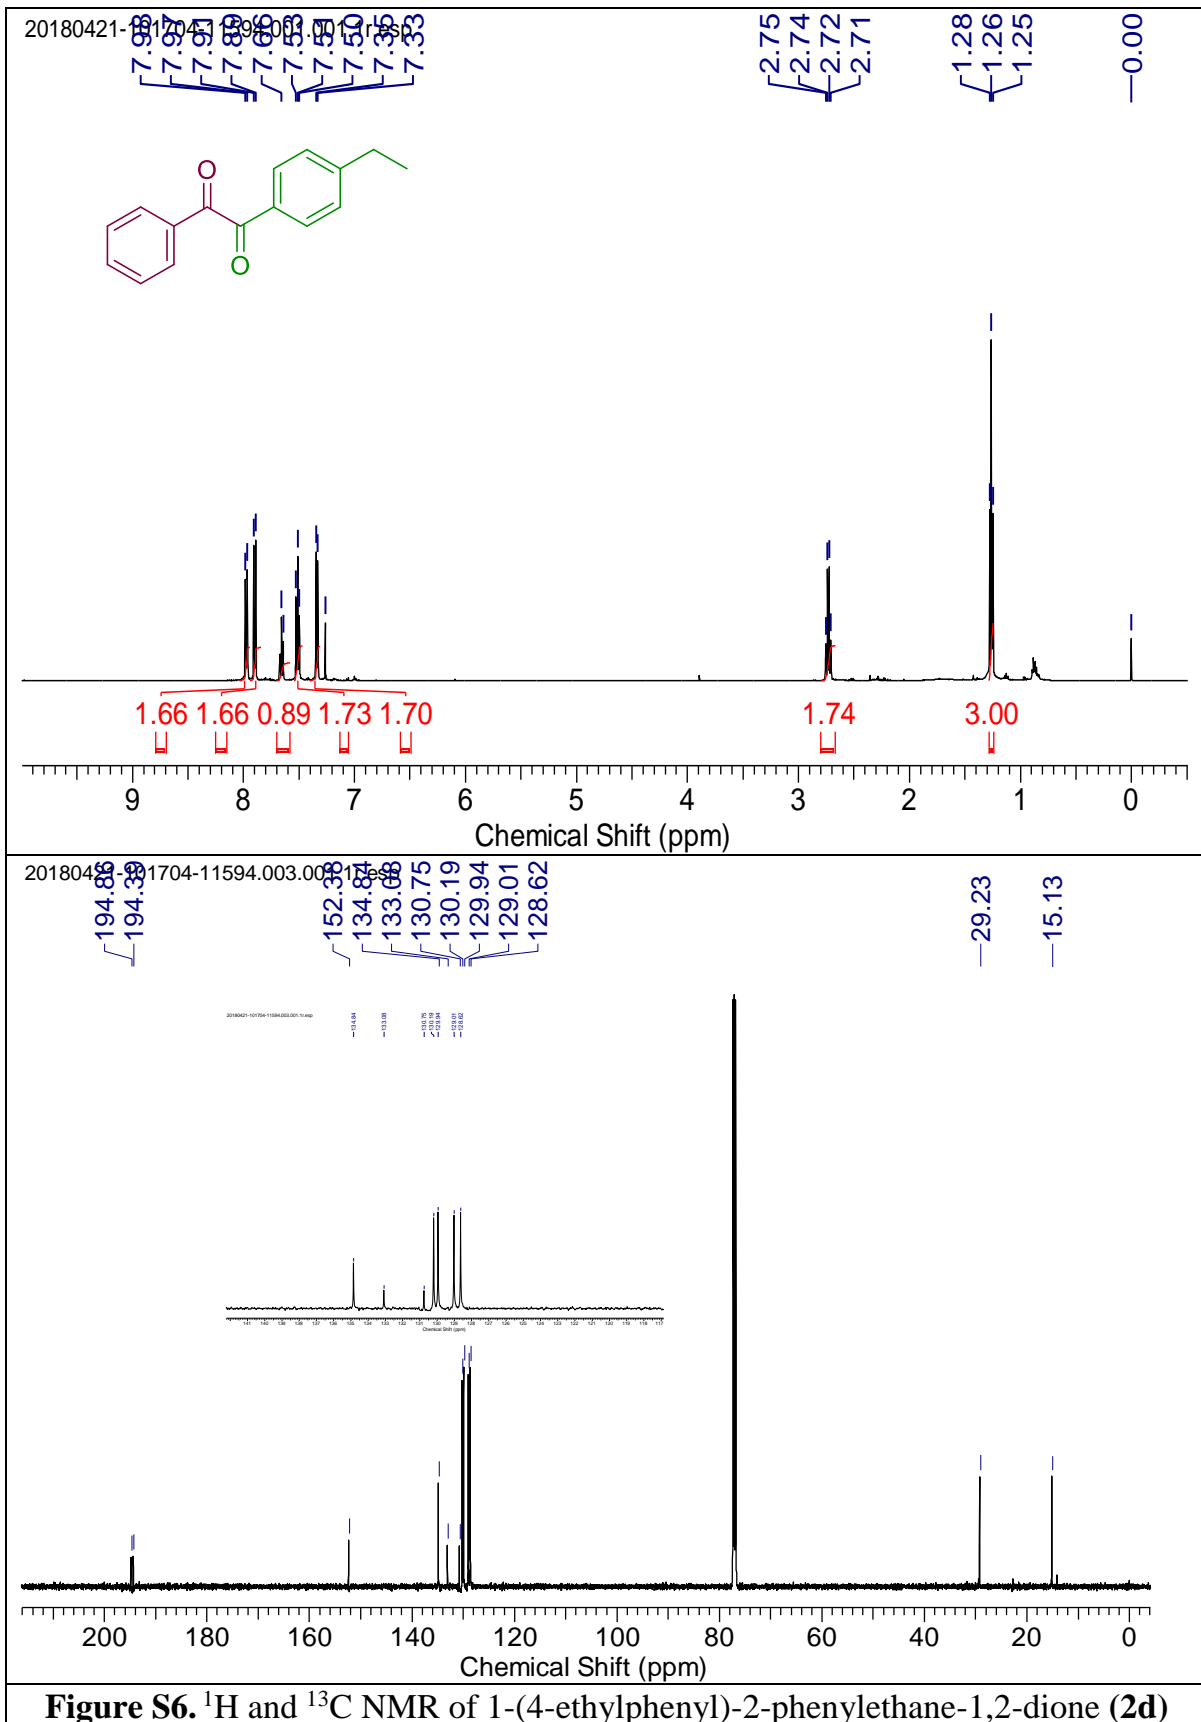

**Figure S6.** <sup>1</sup>H and <sup>13</sup>C NMR of 1-(4-ethylphenyl)-2-phenylethane-1,2-dione (2d)



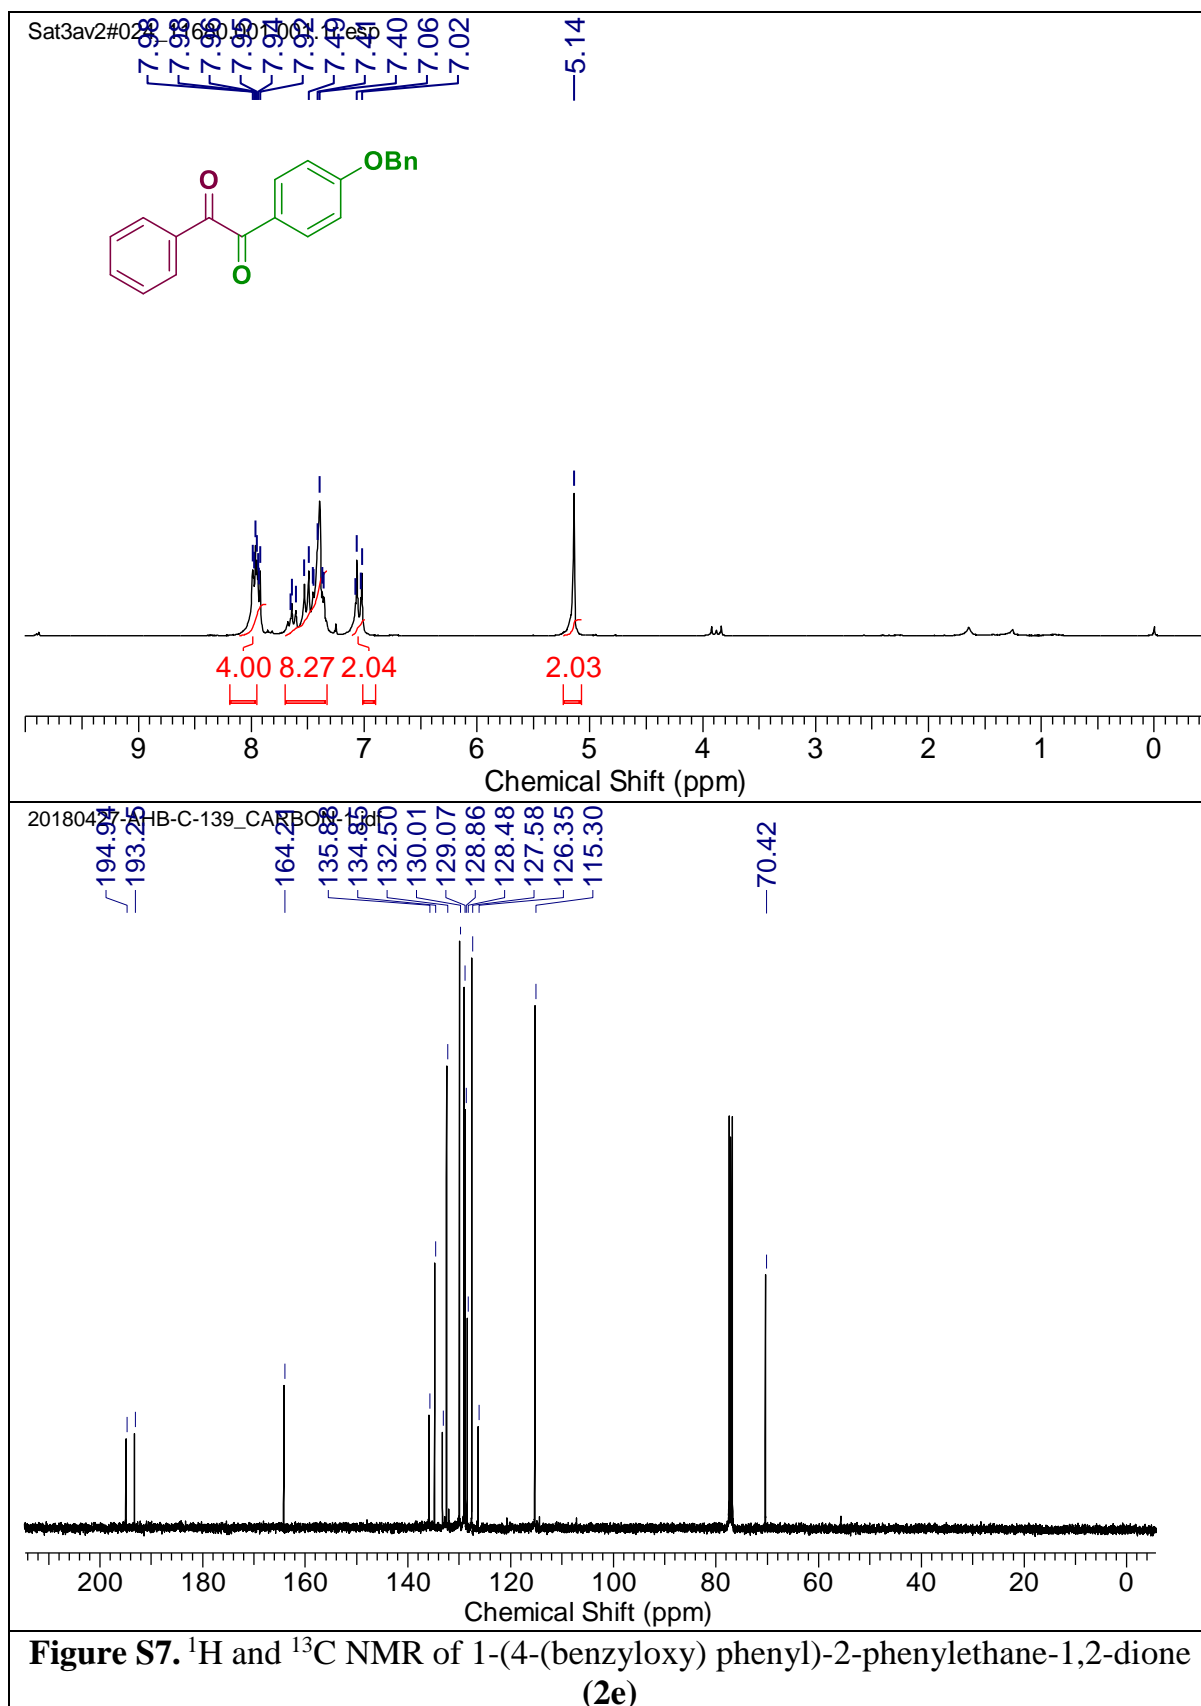

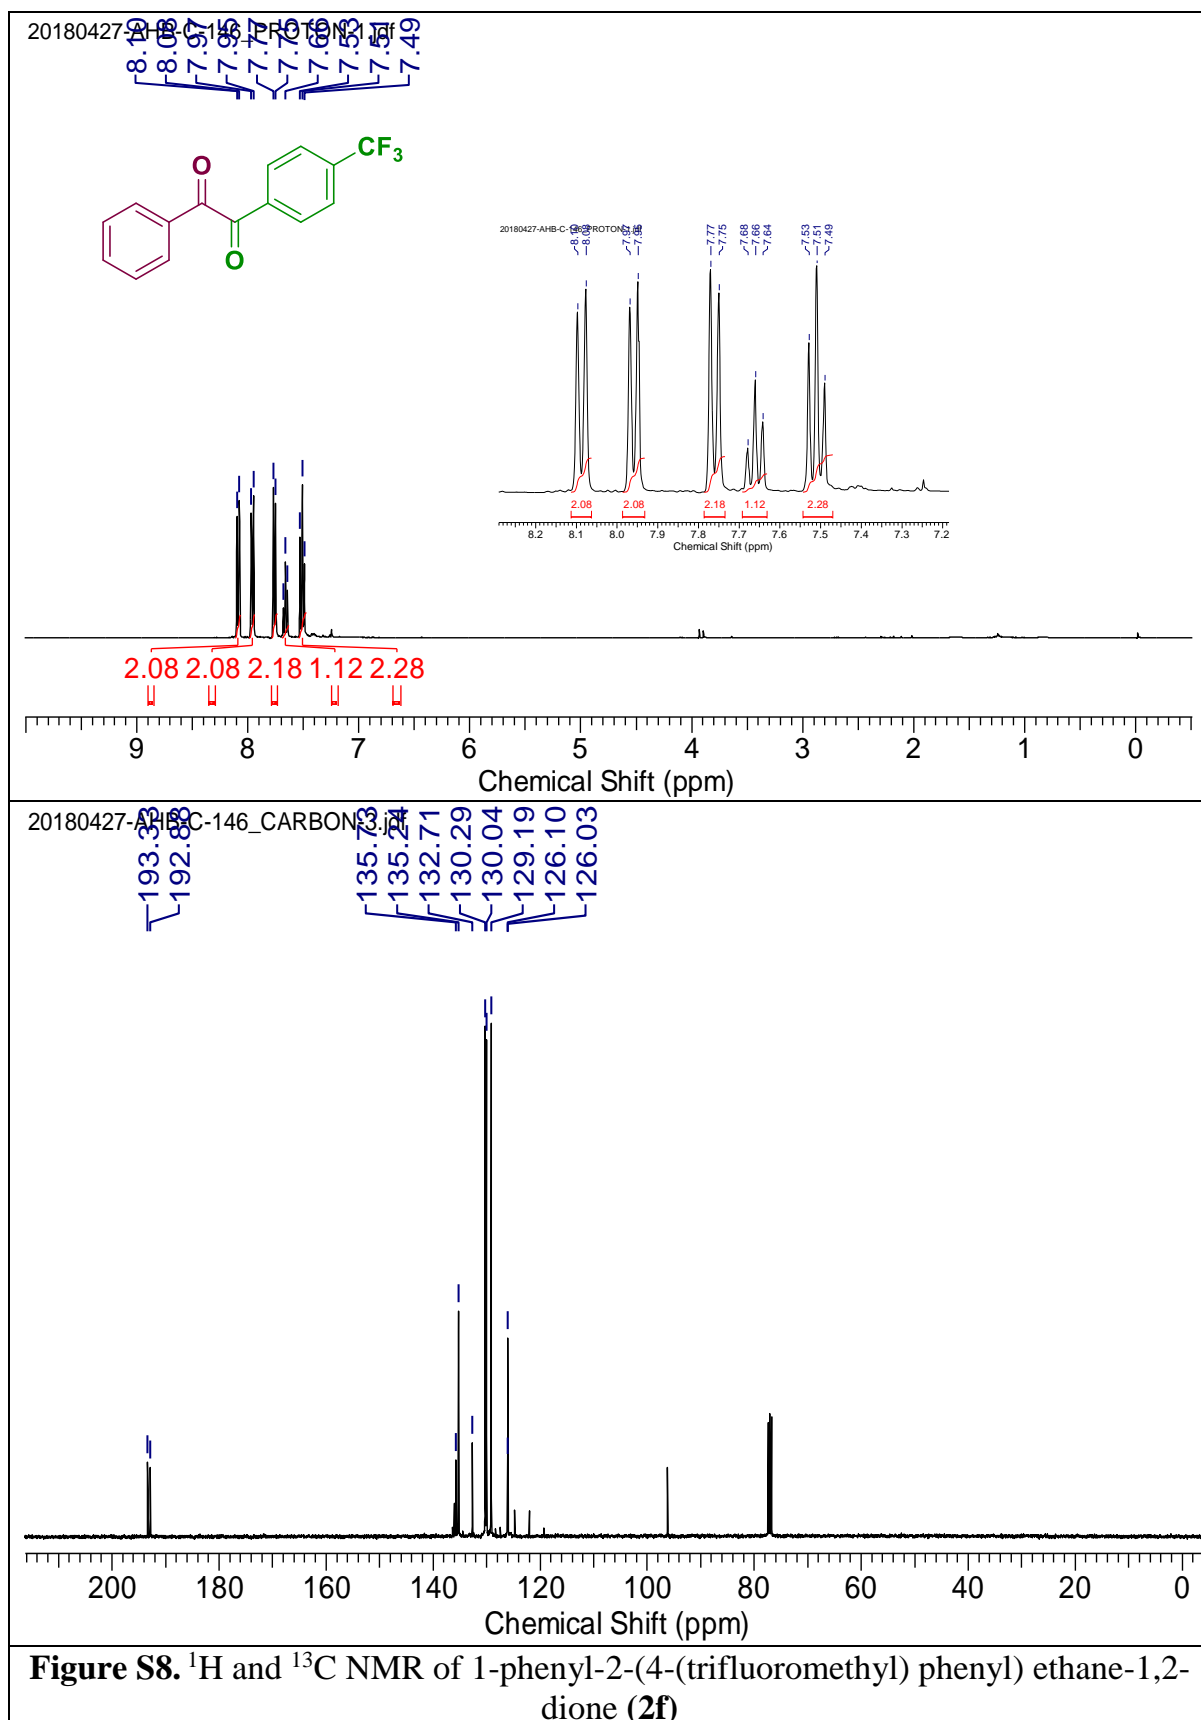

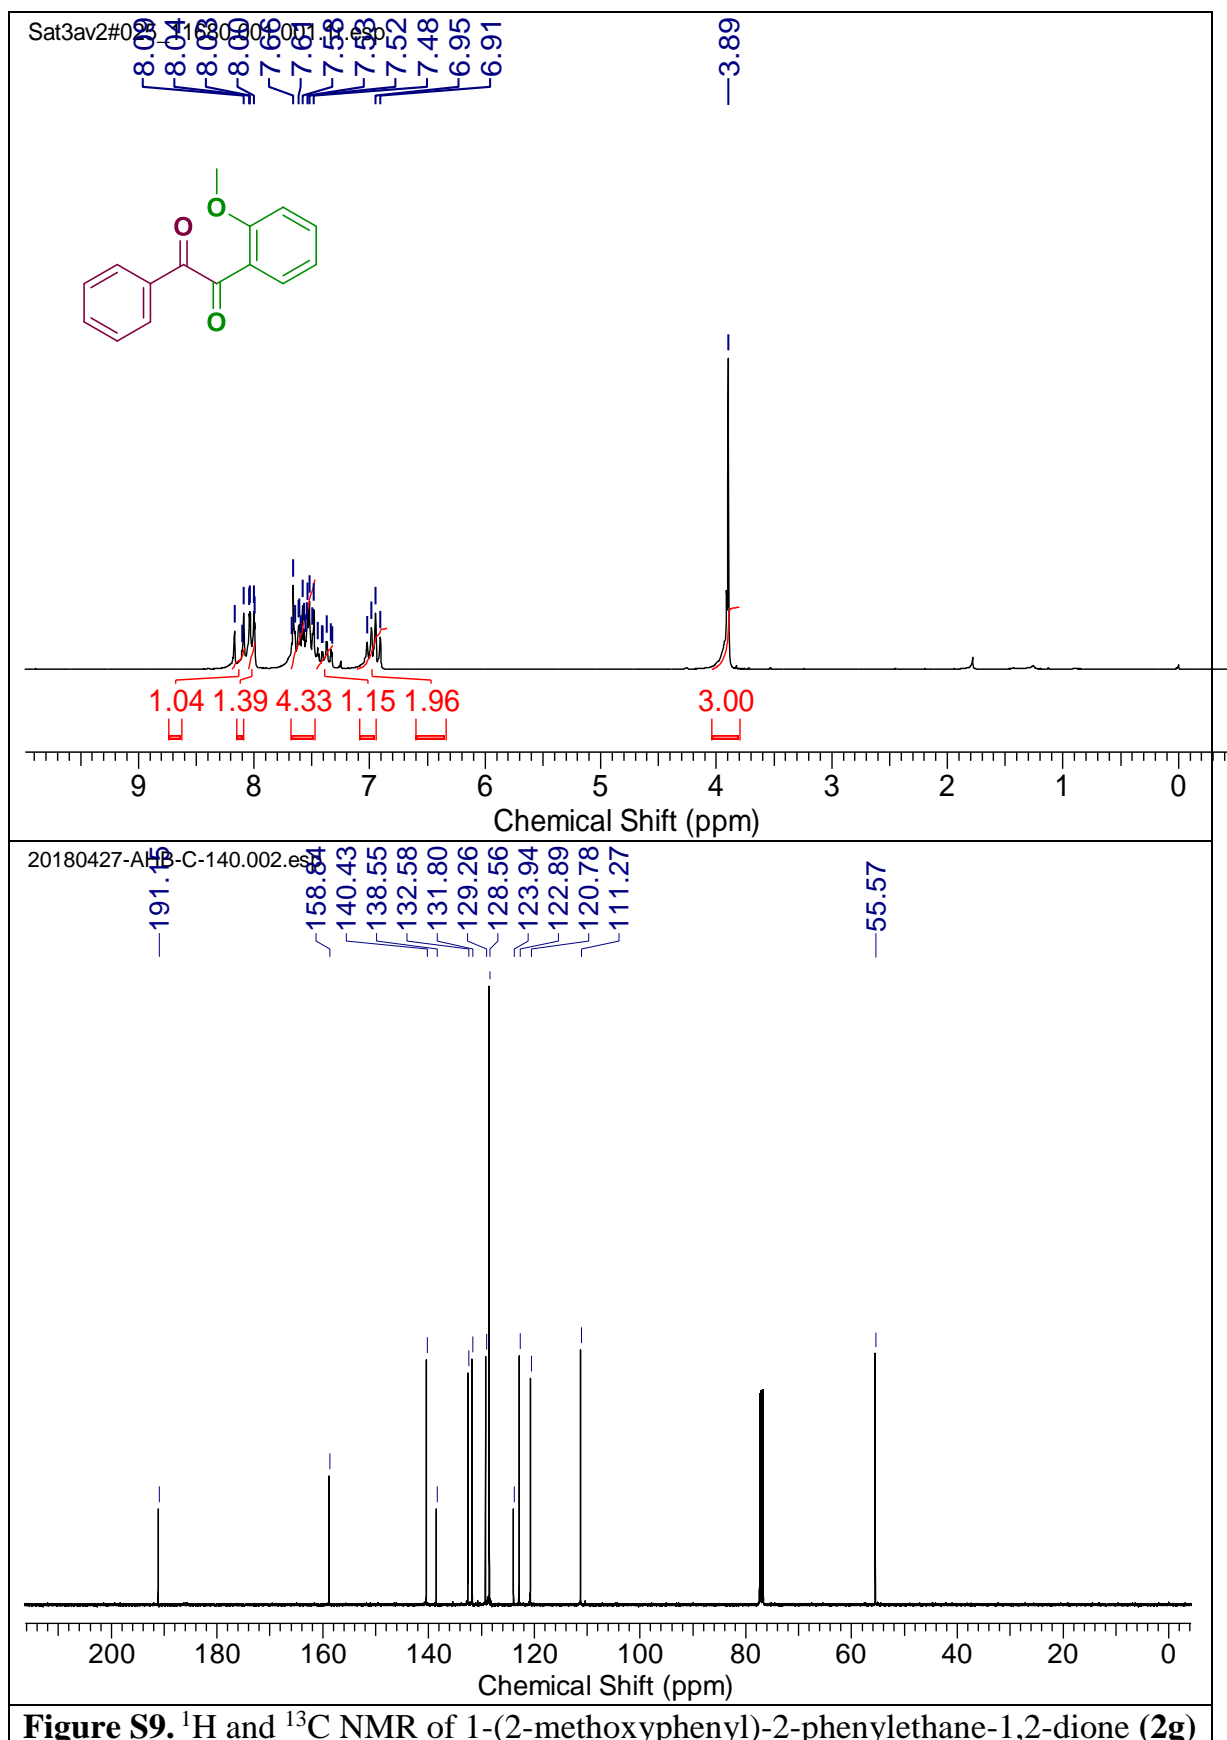

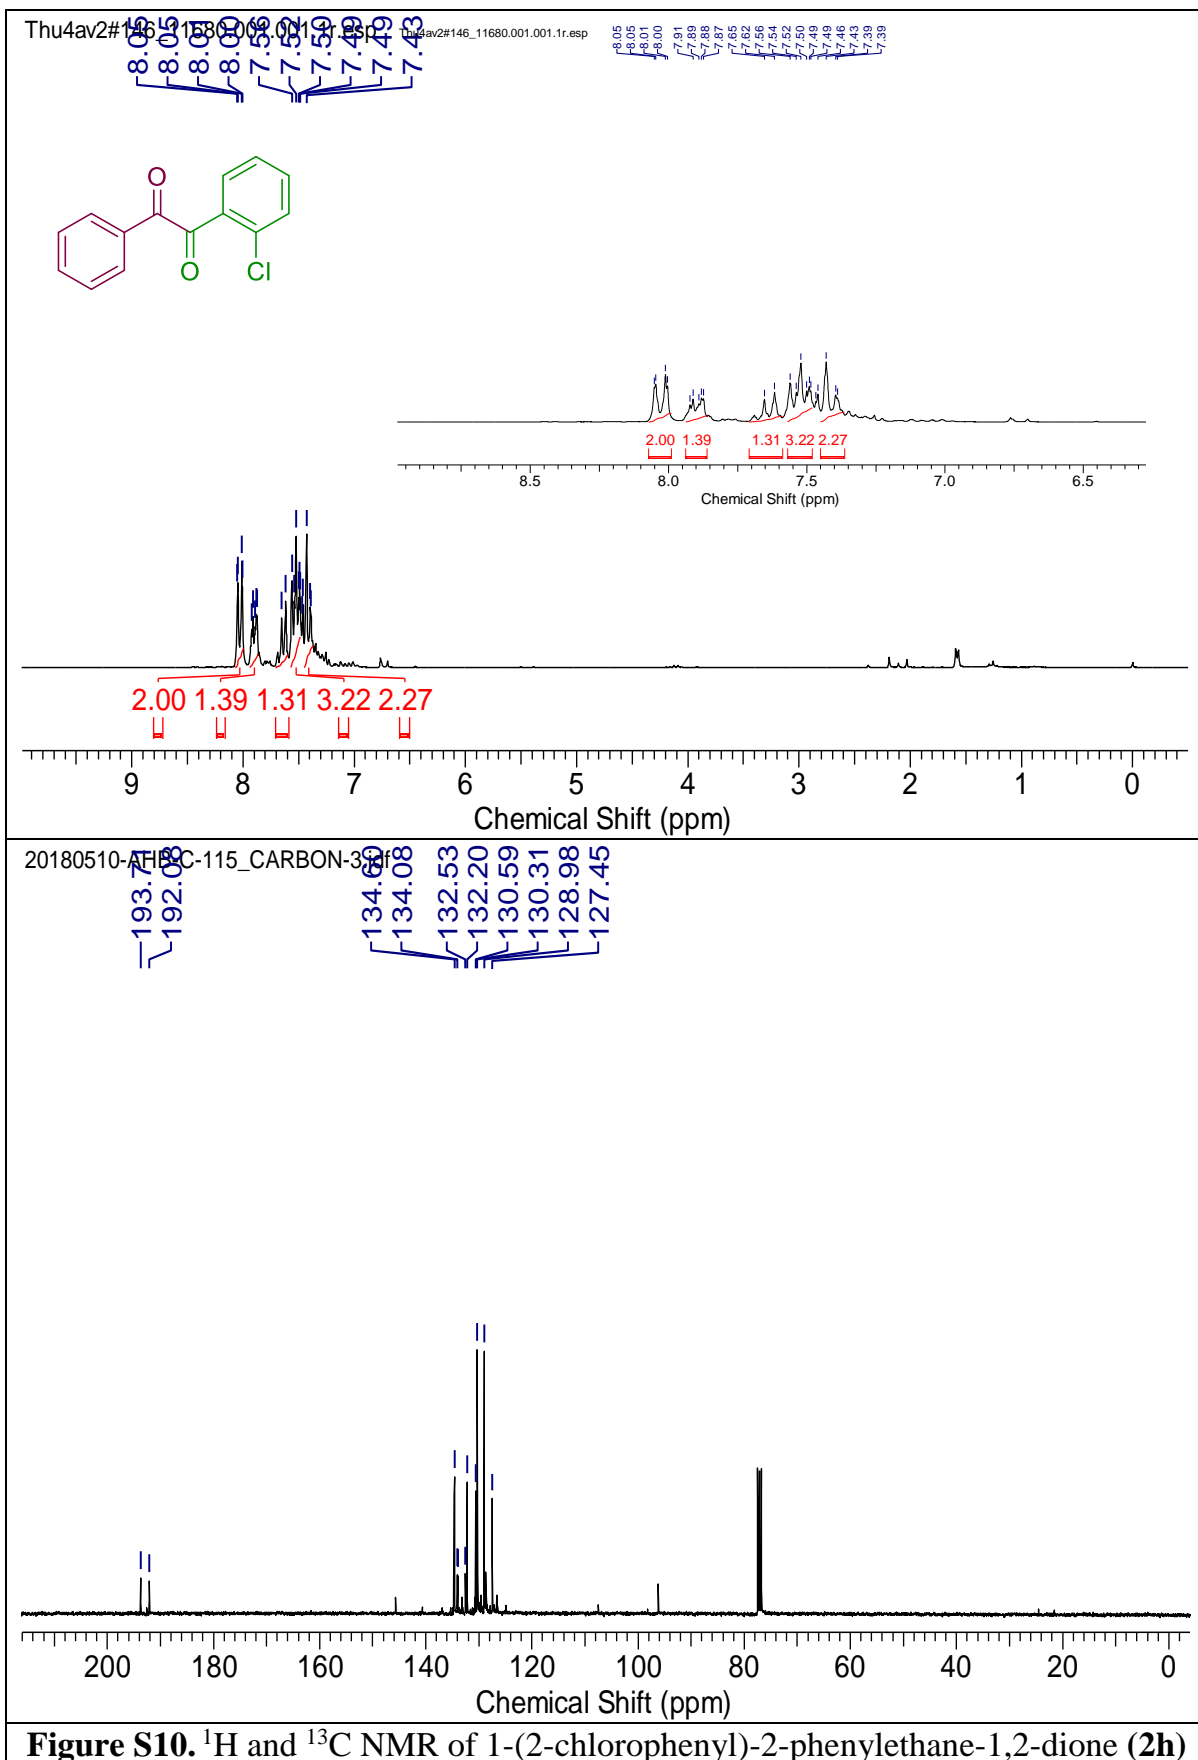

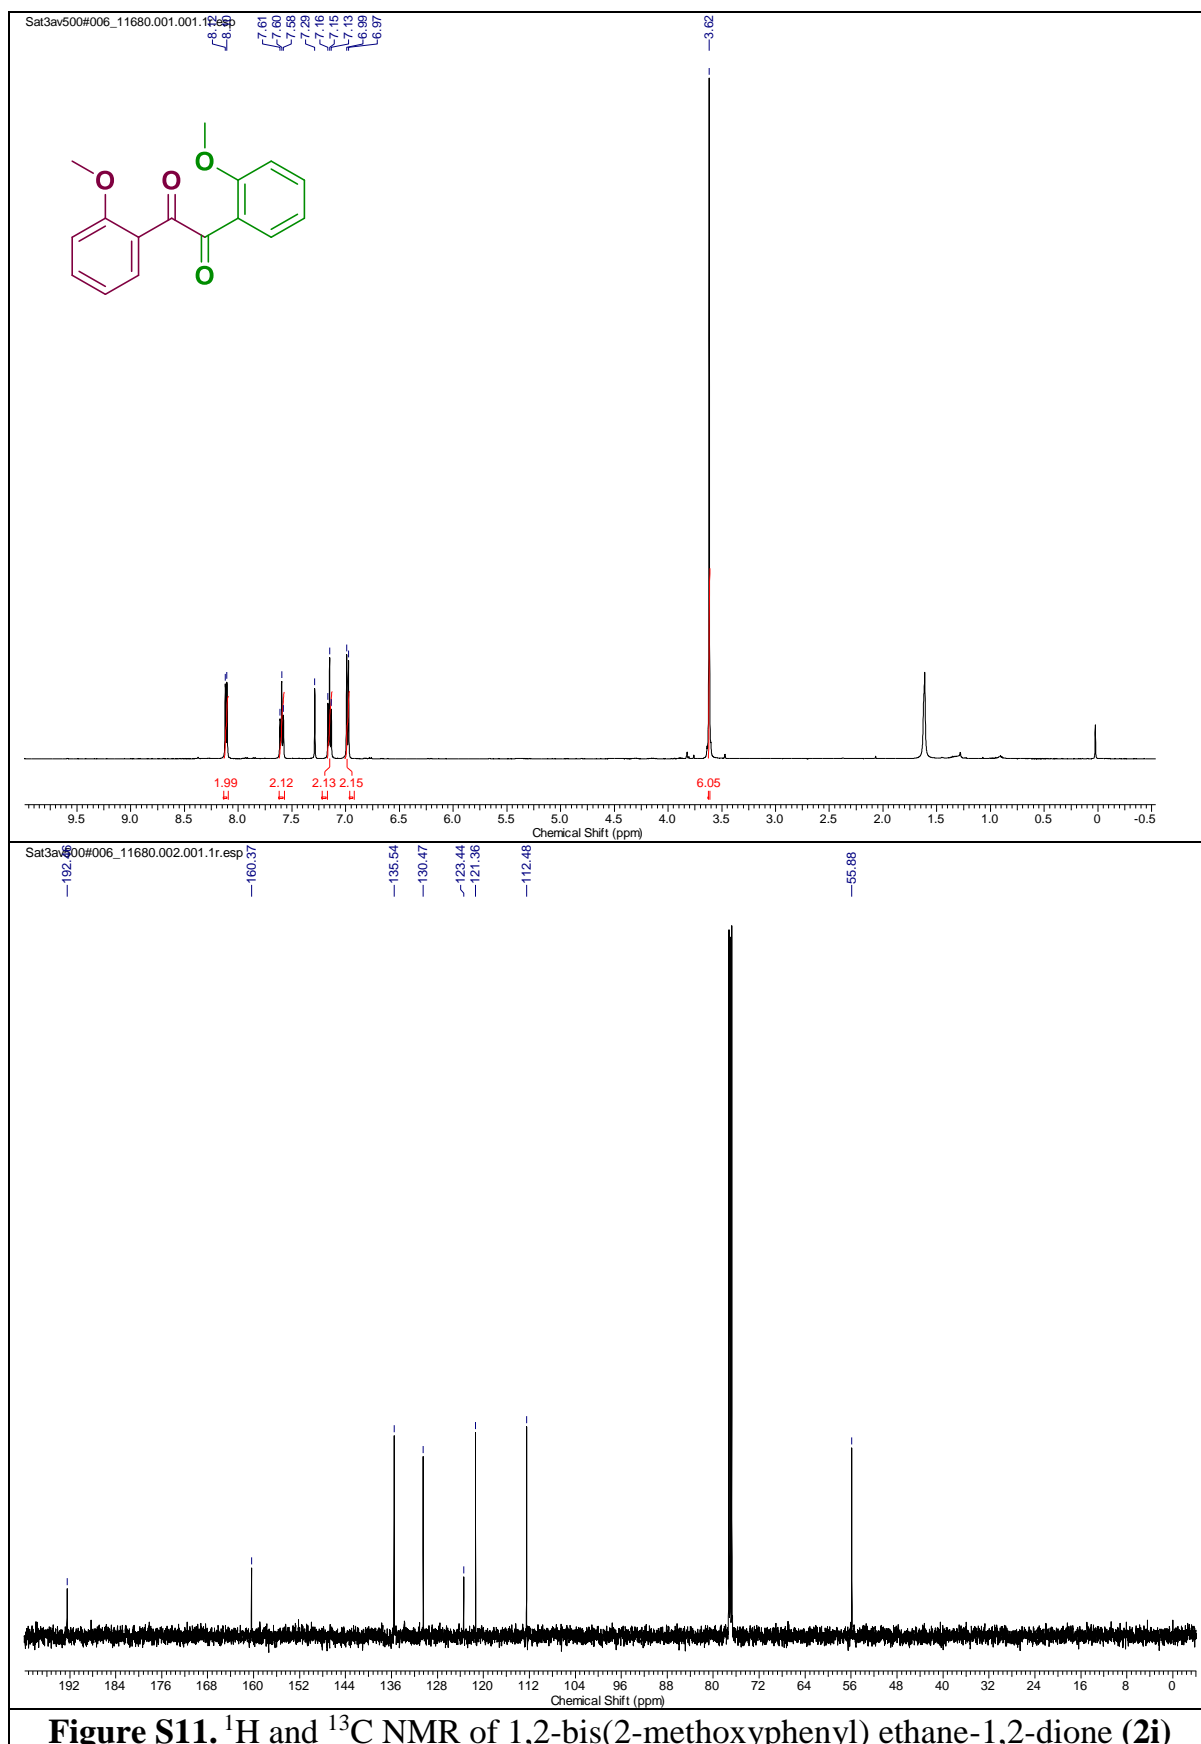

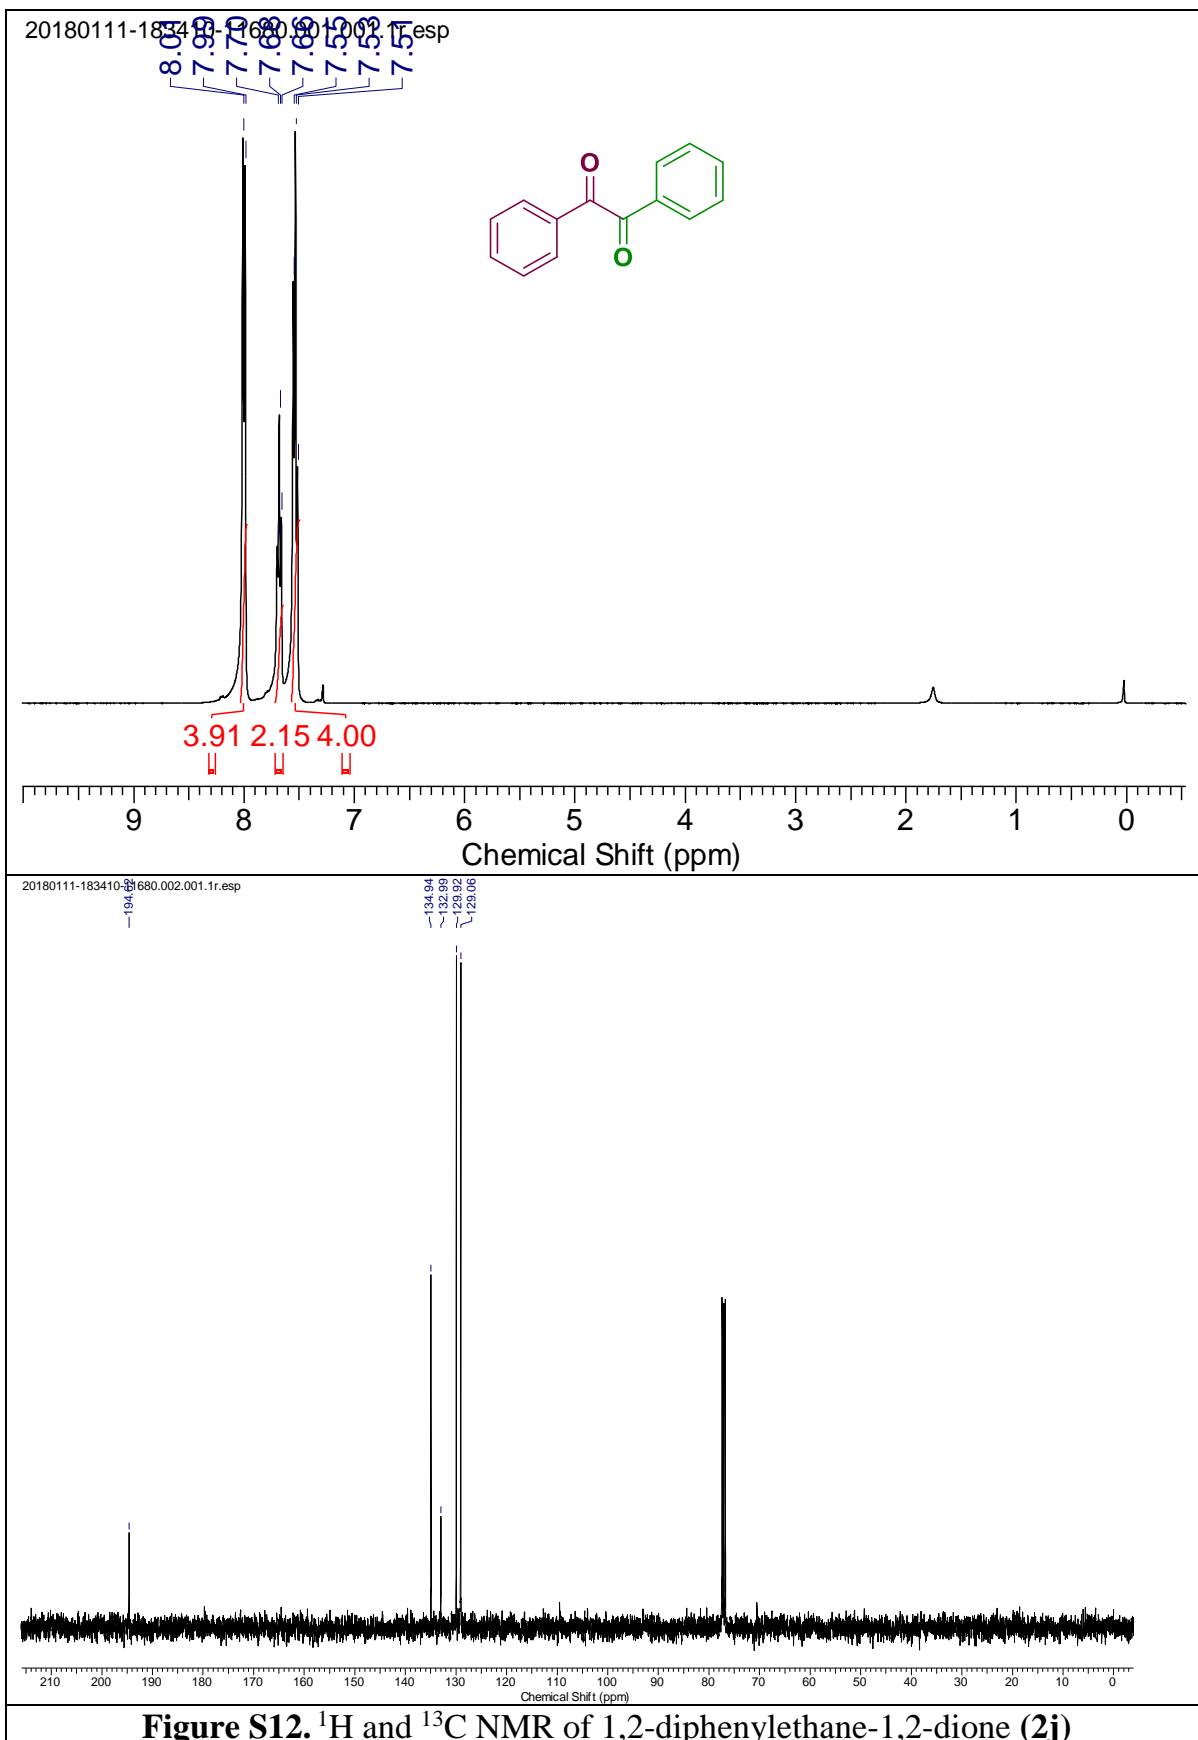

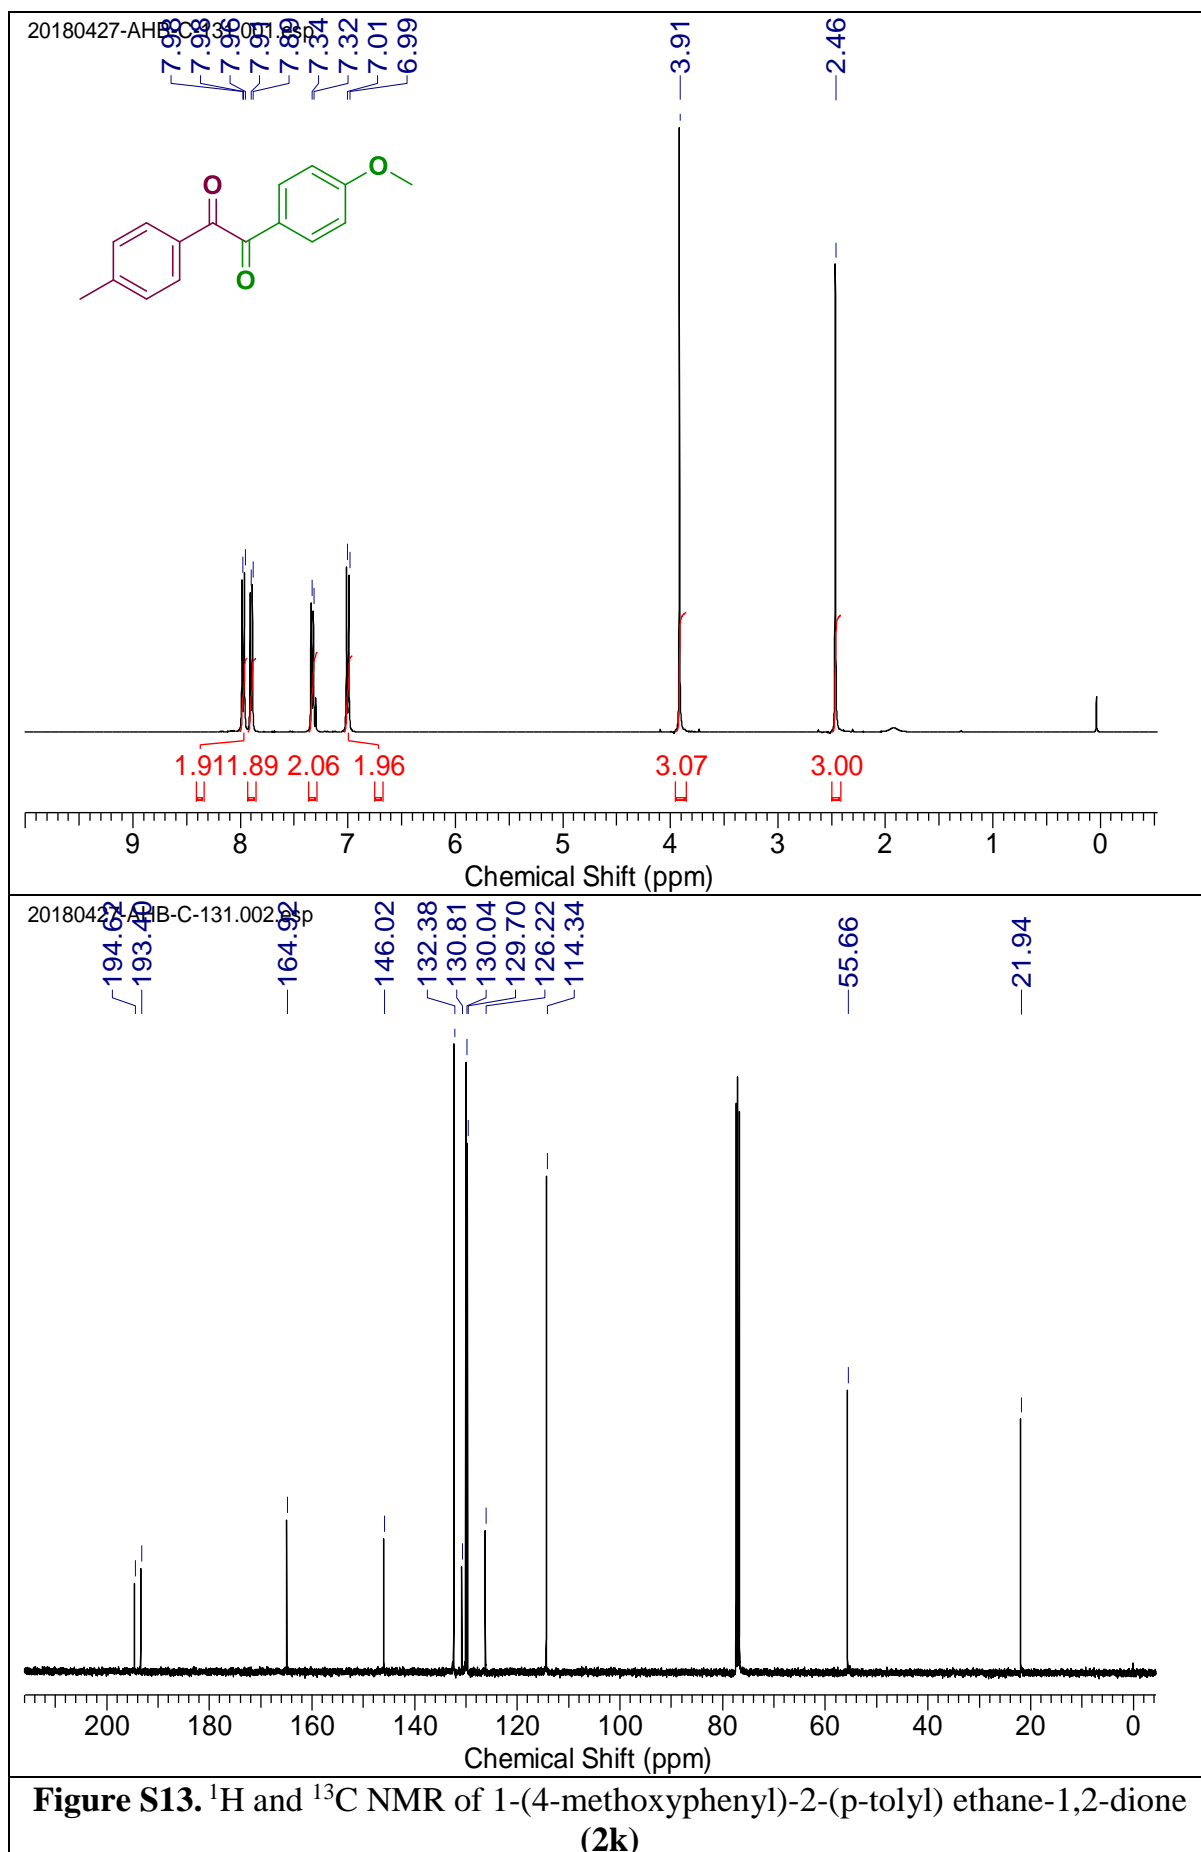

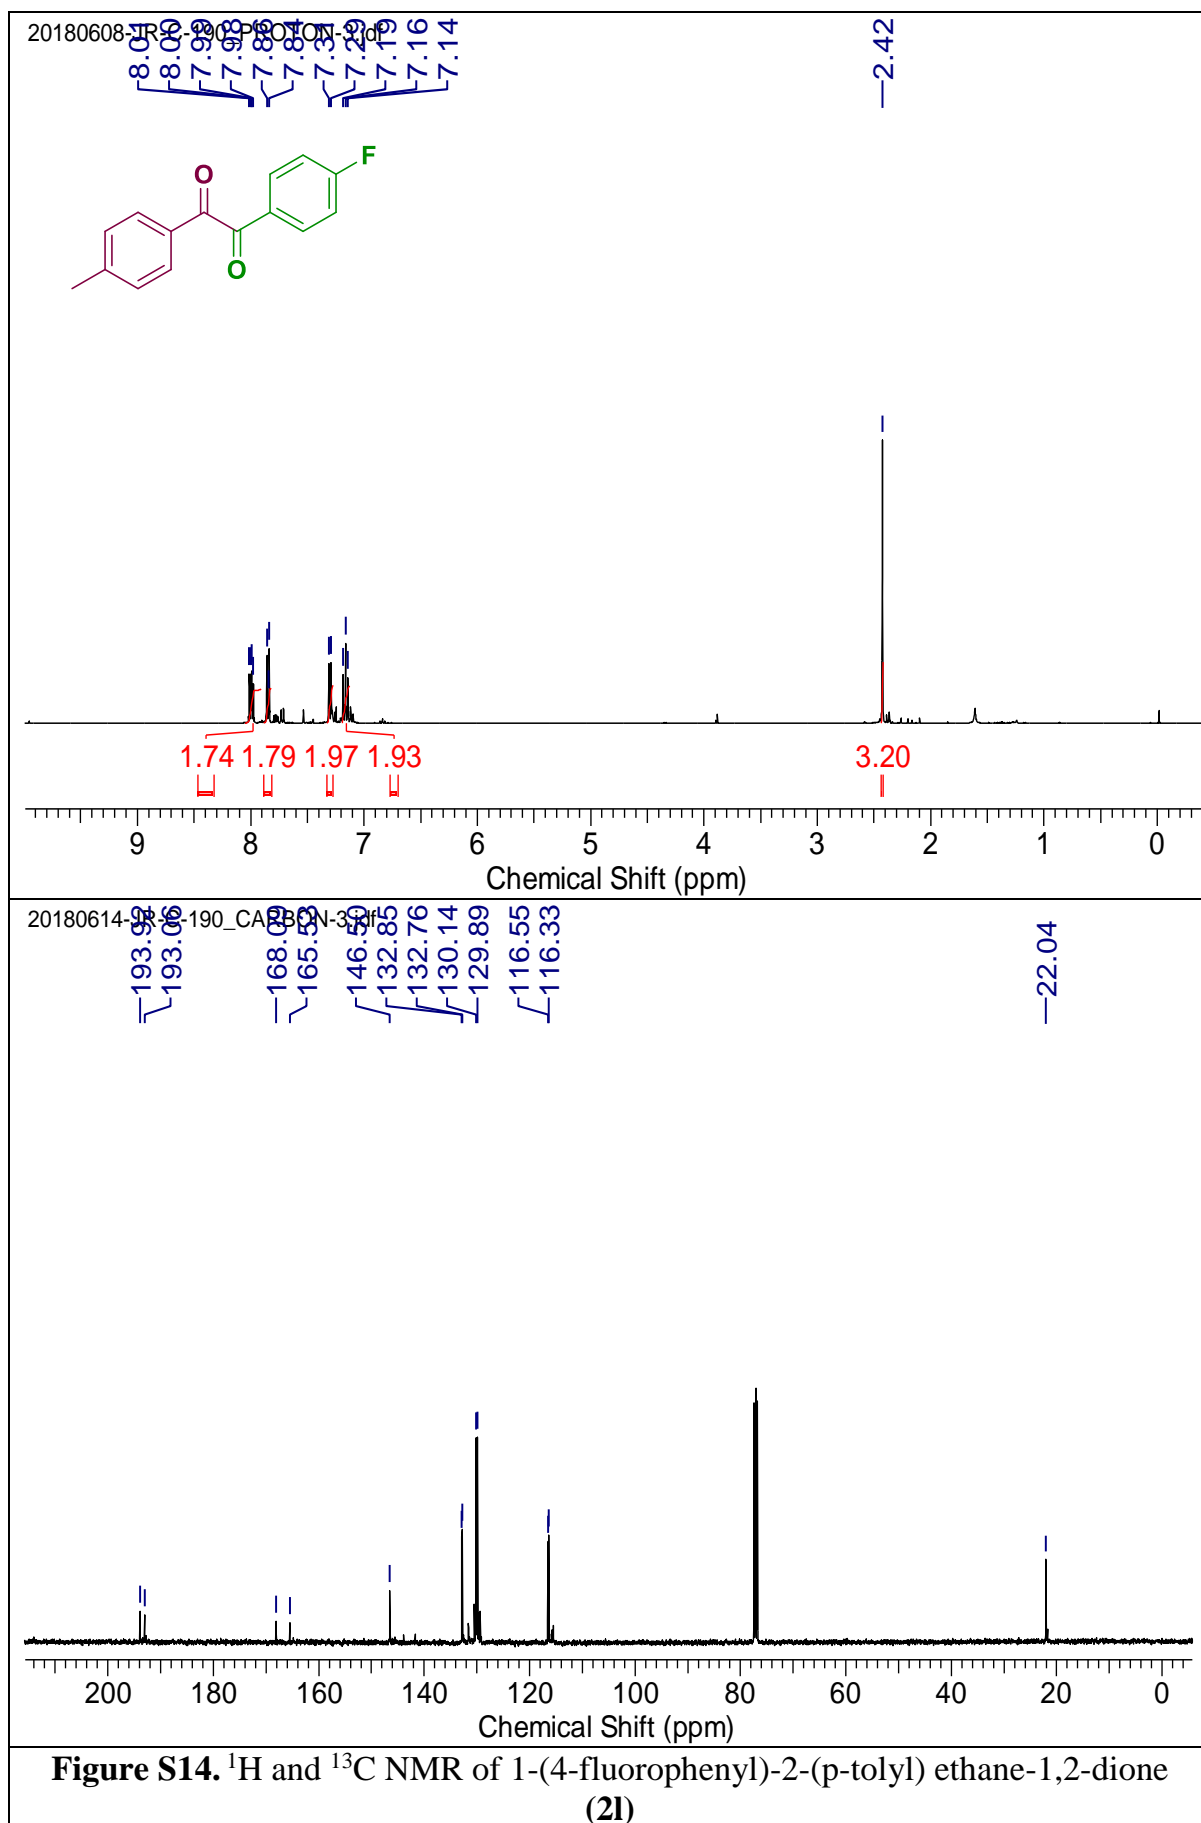



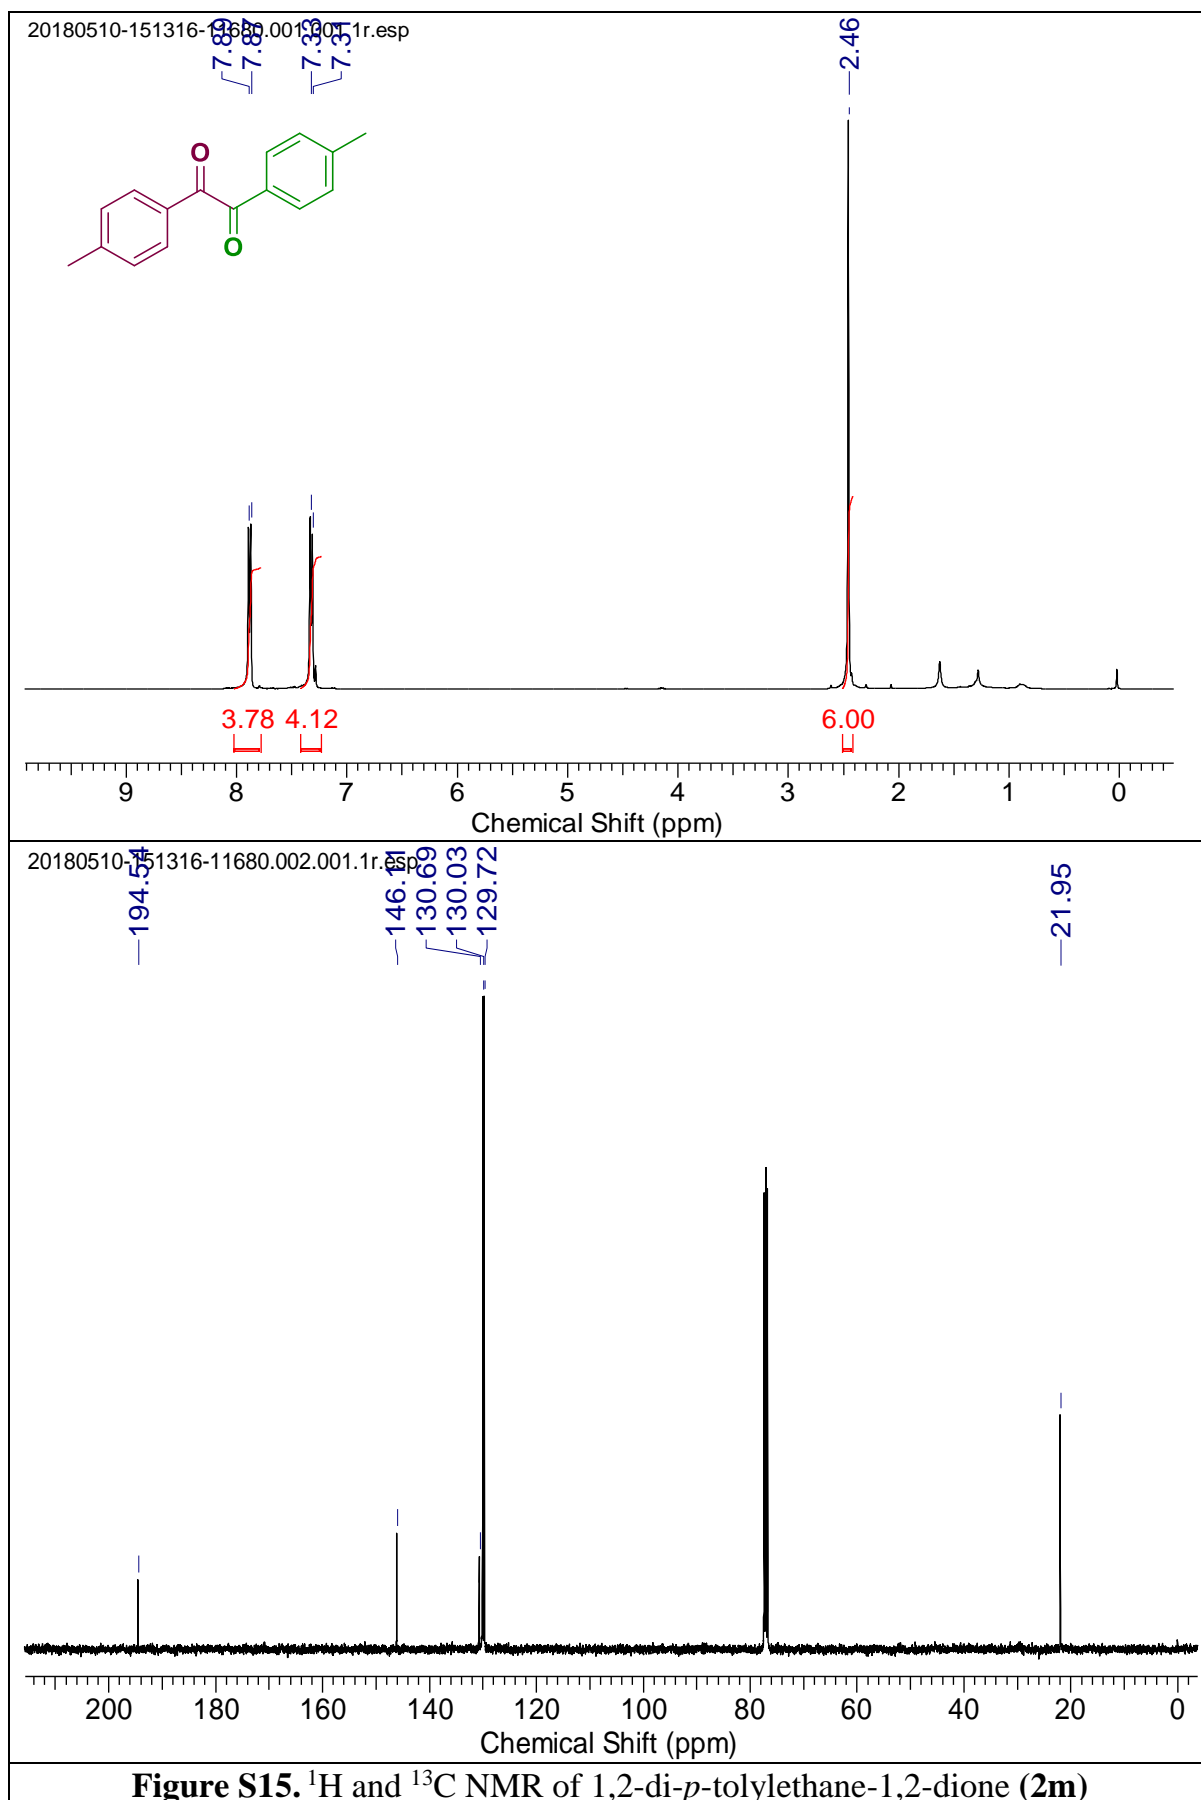

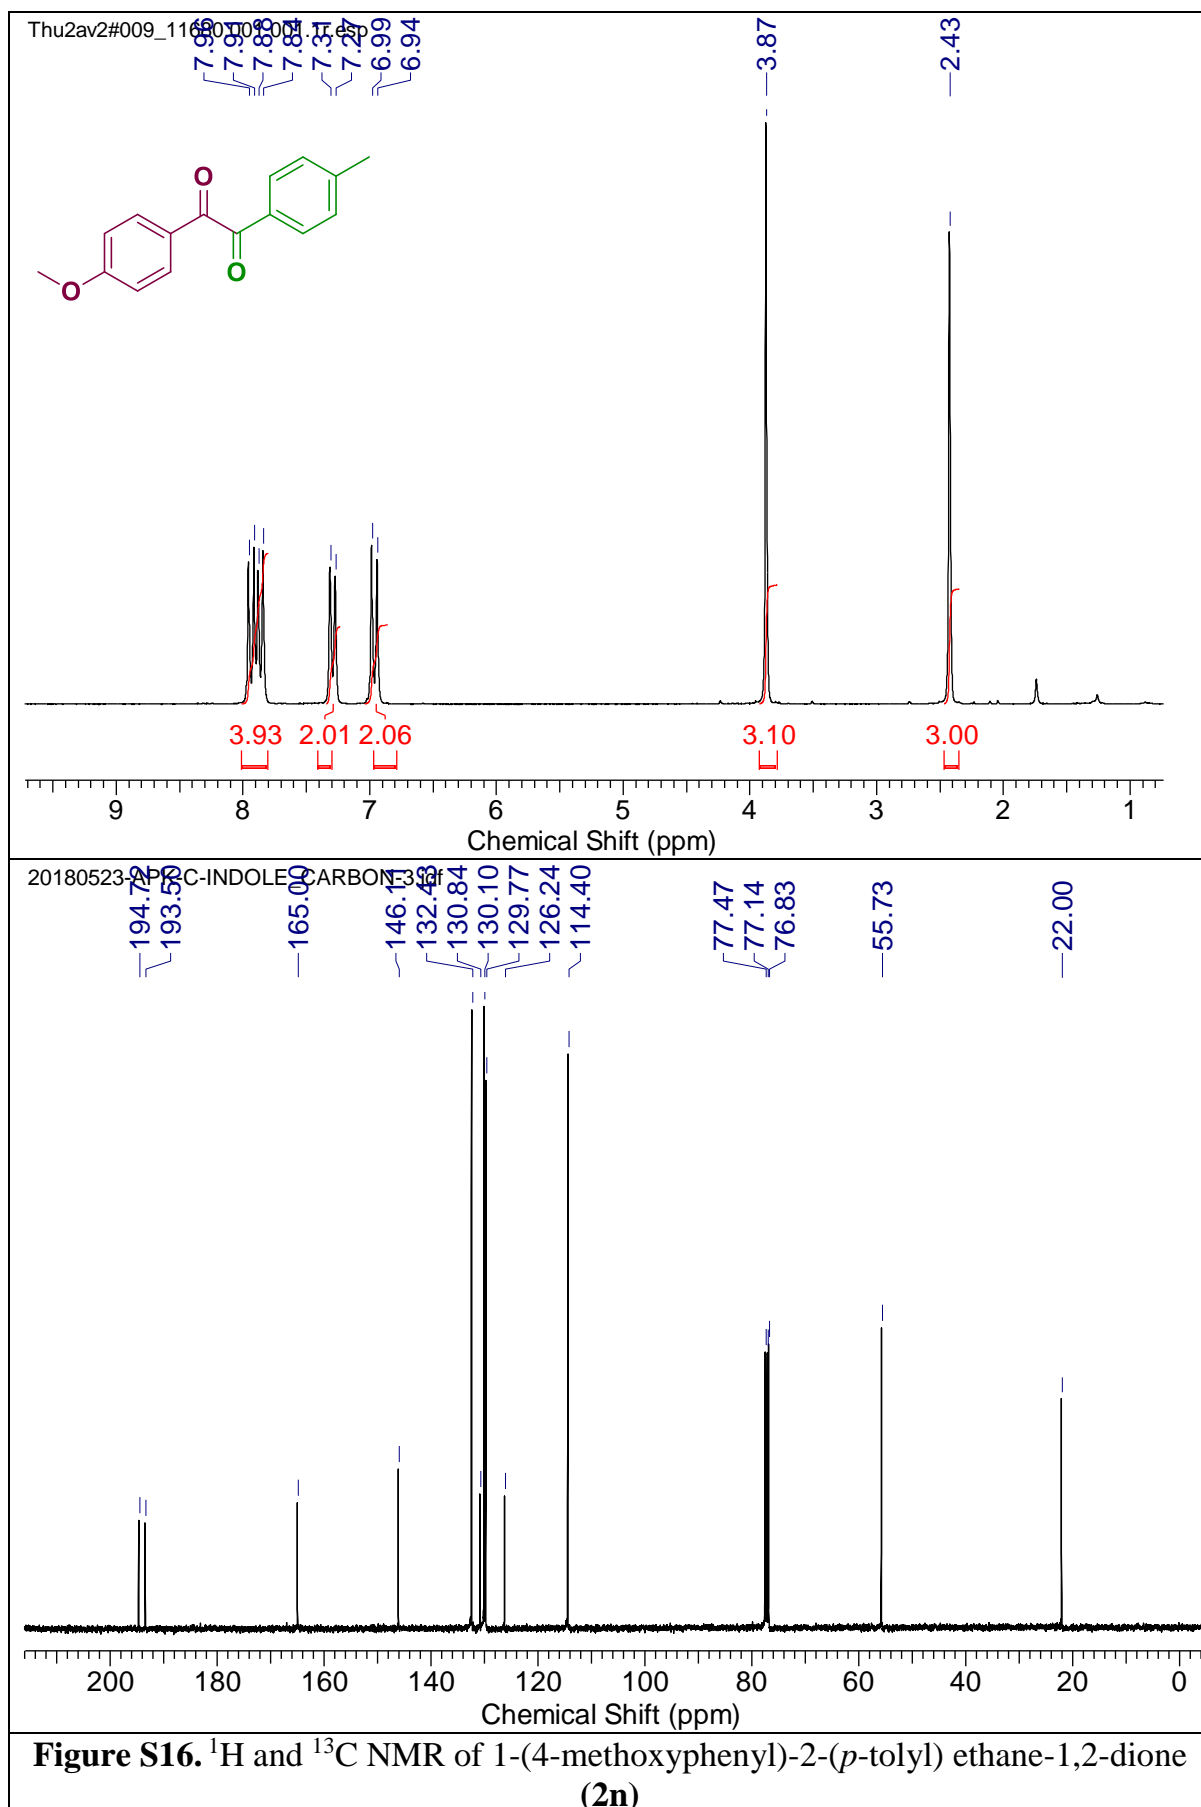

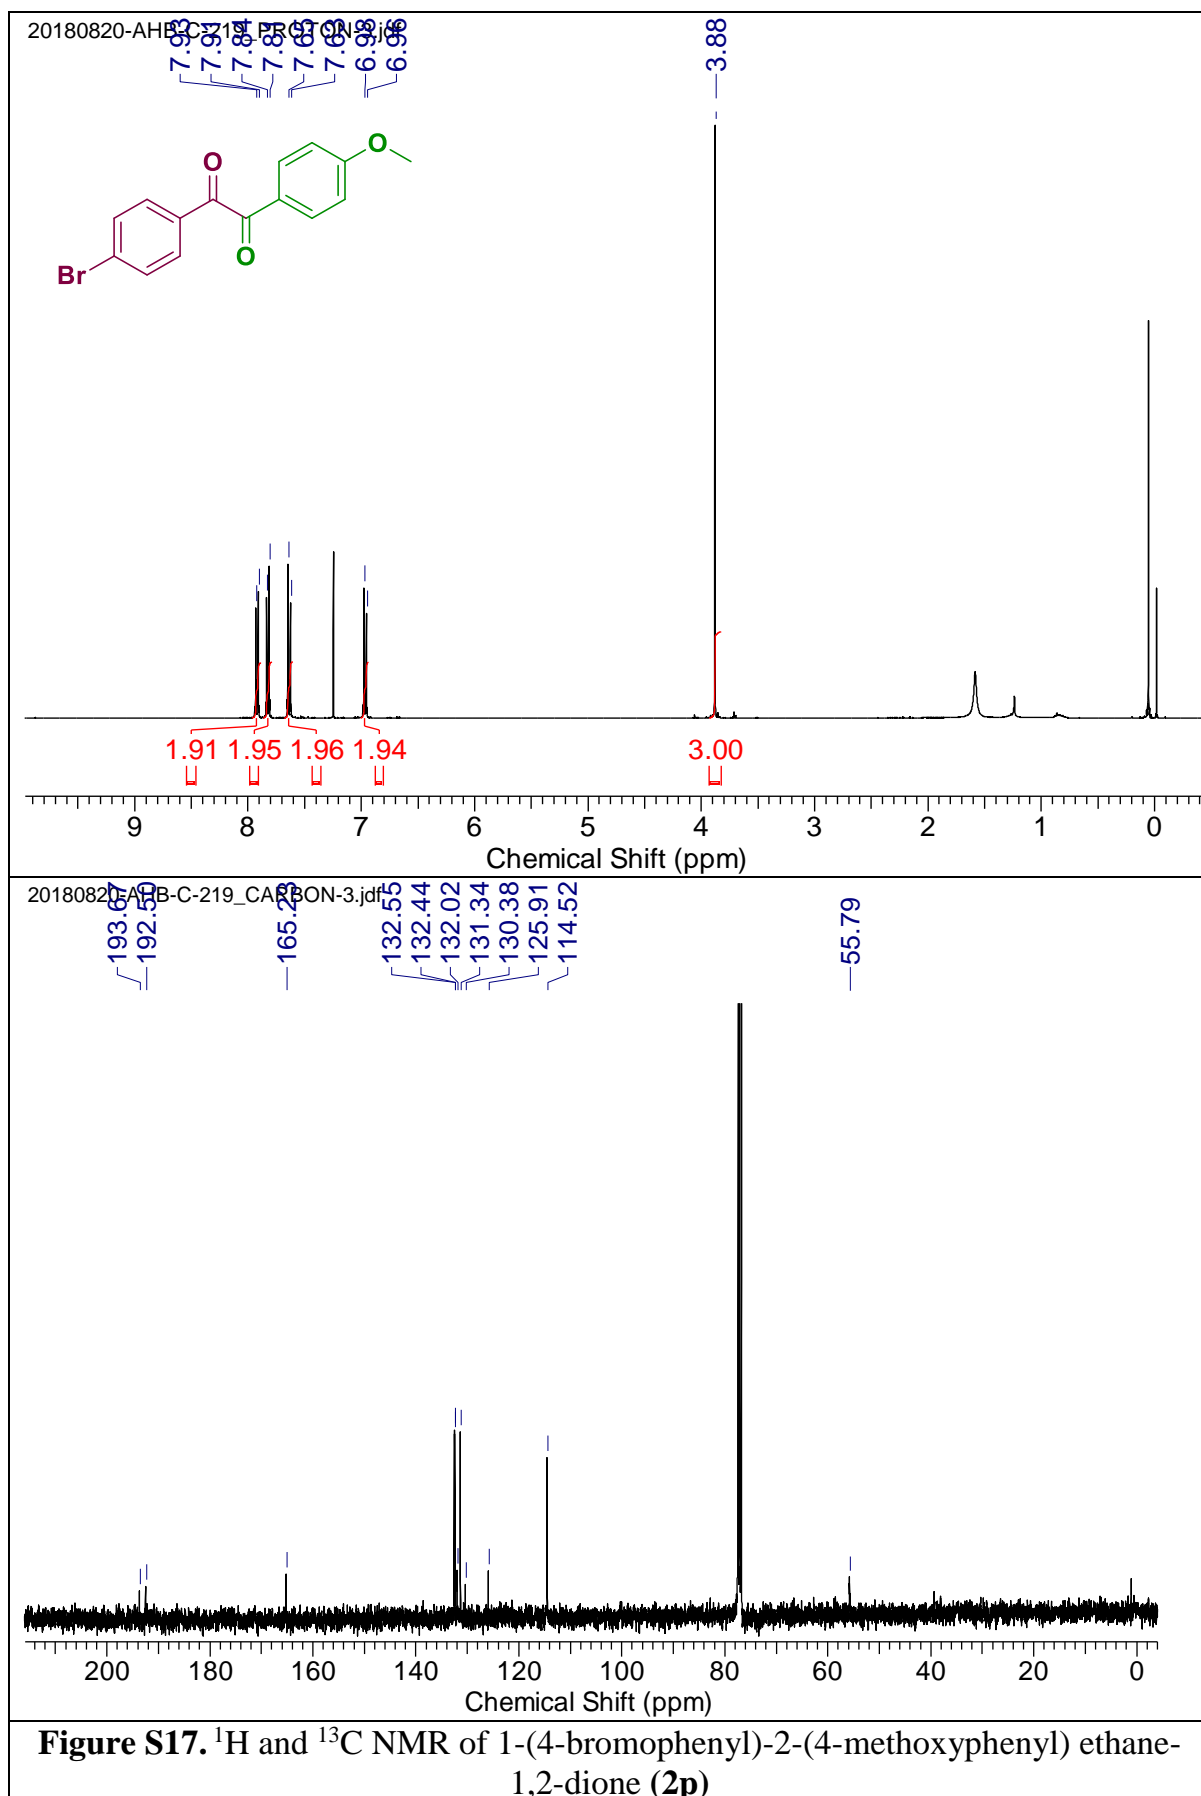

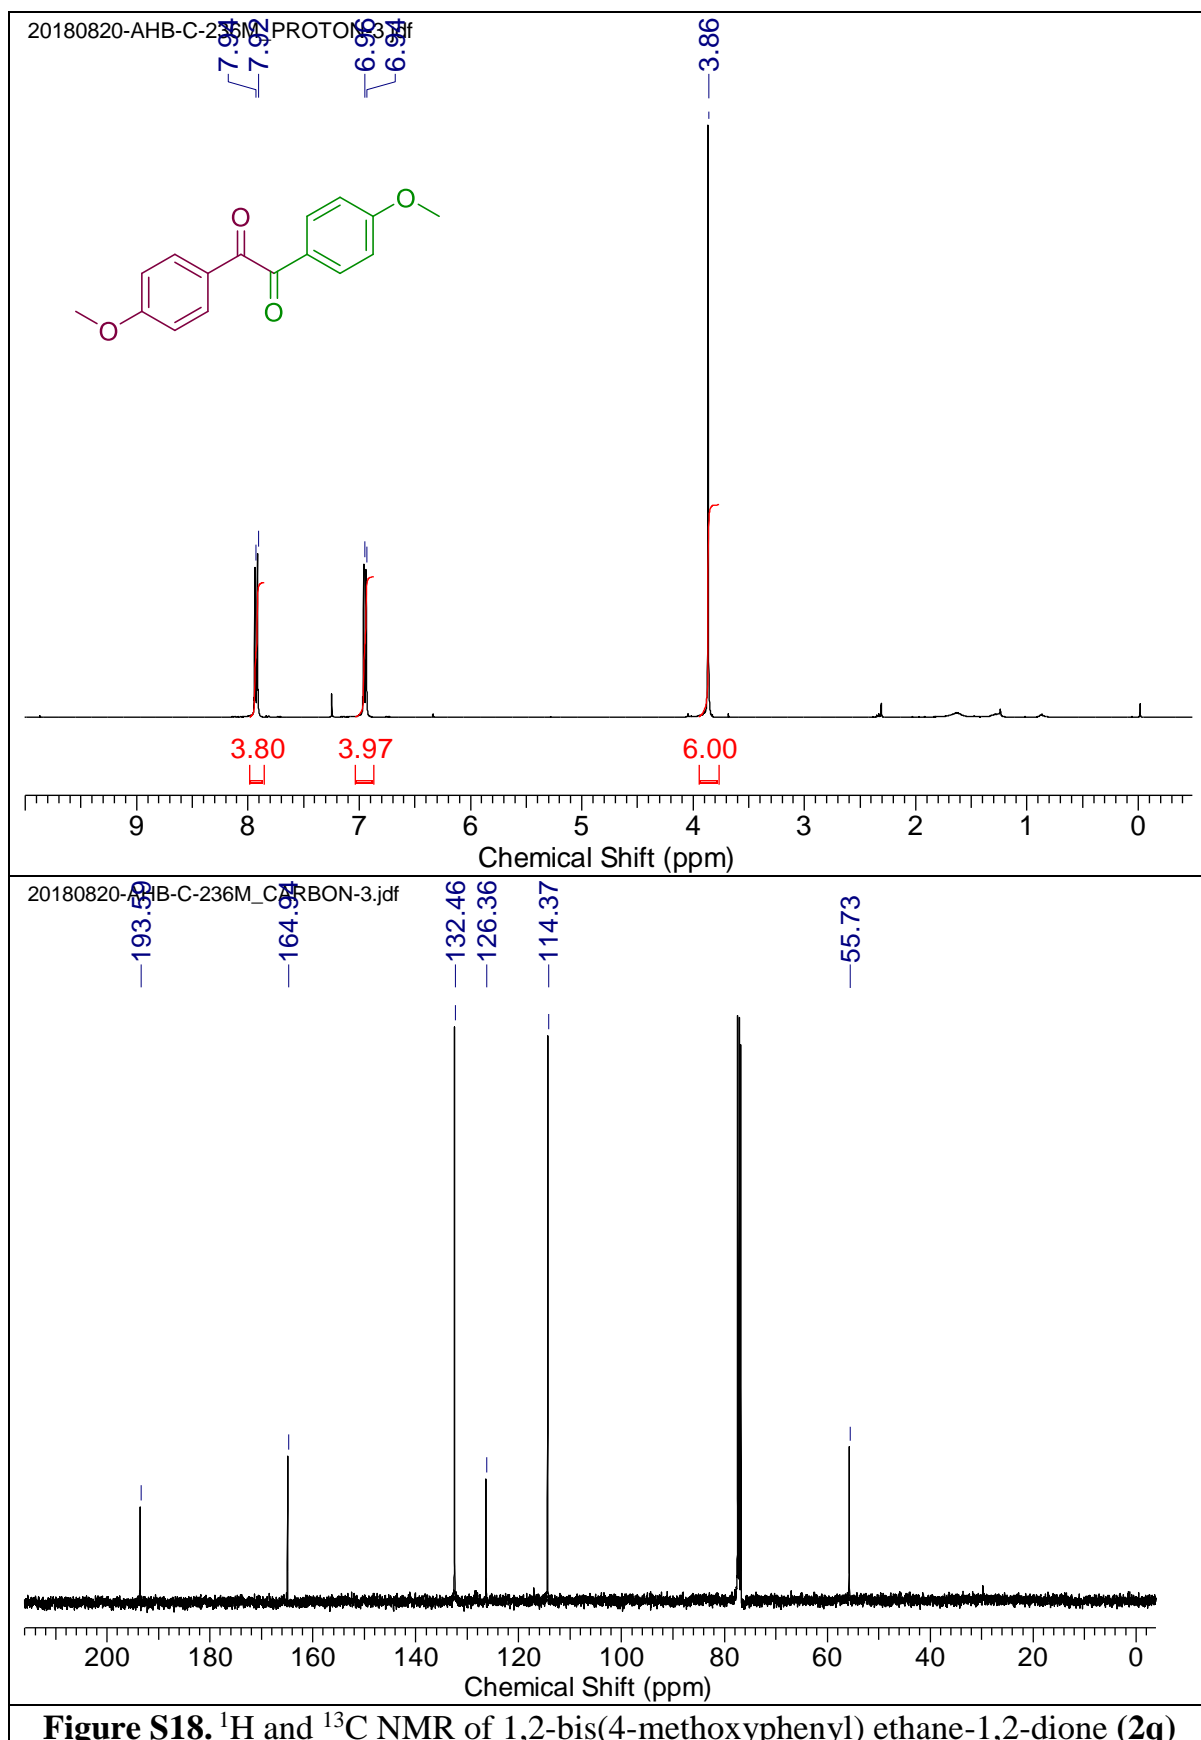

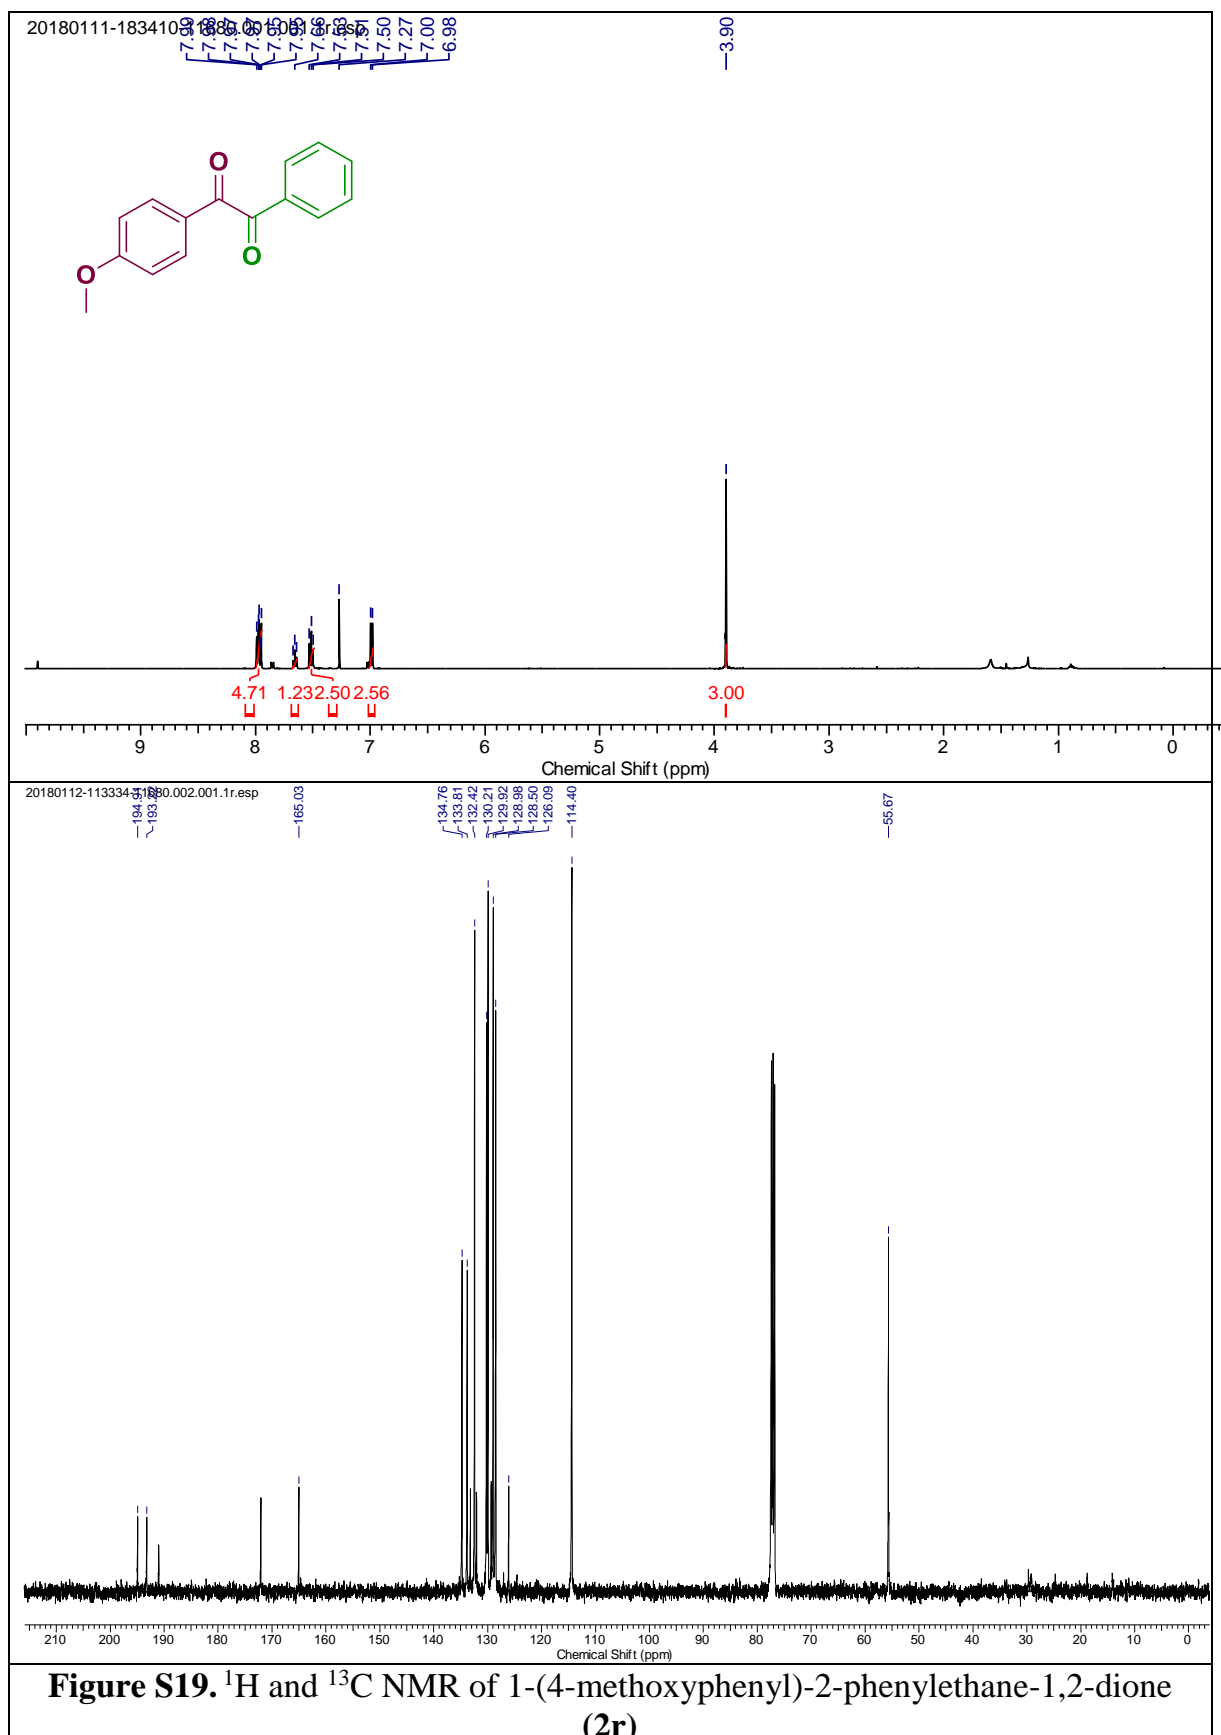

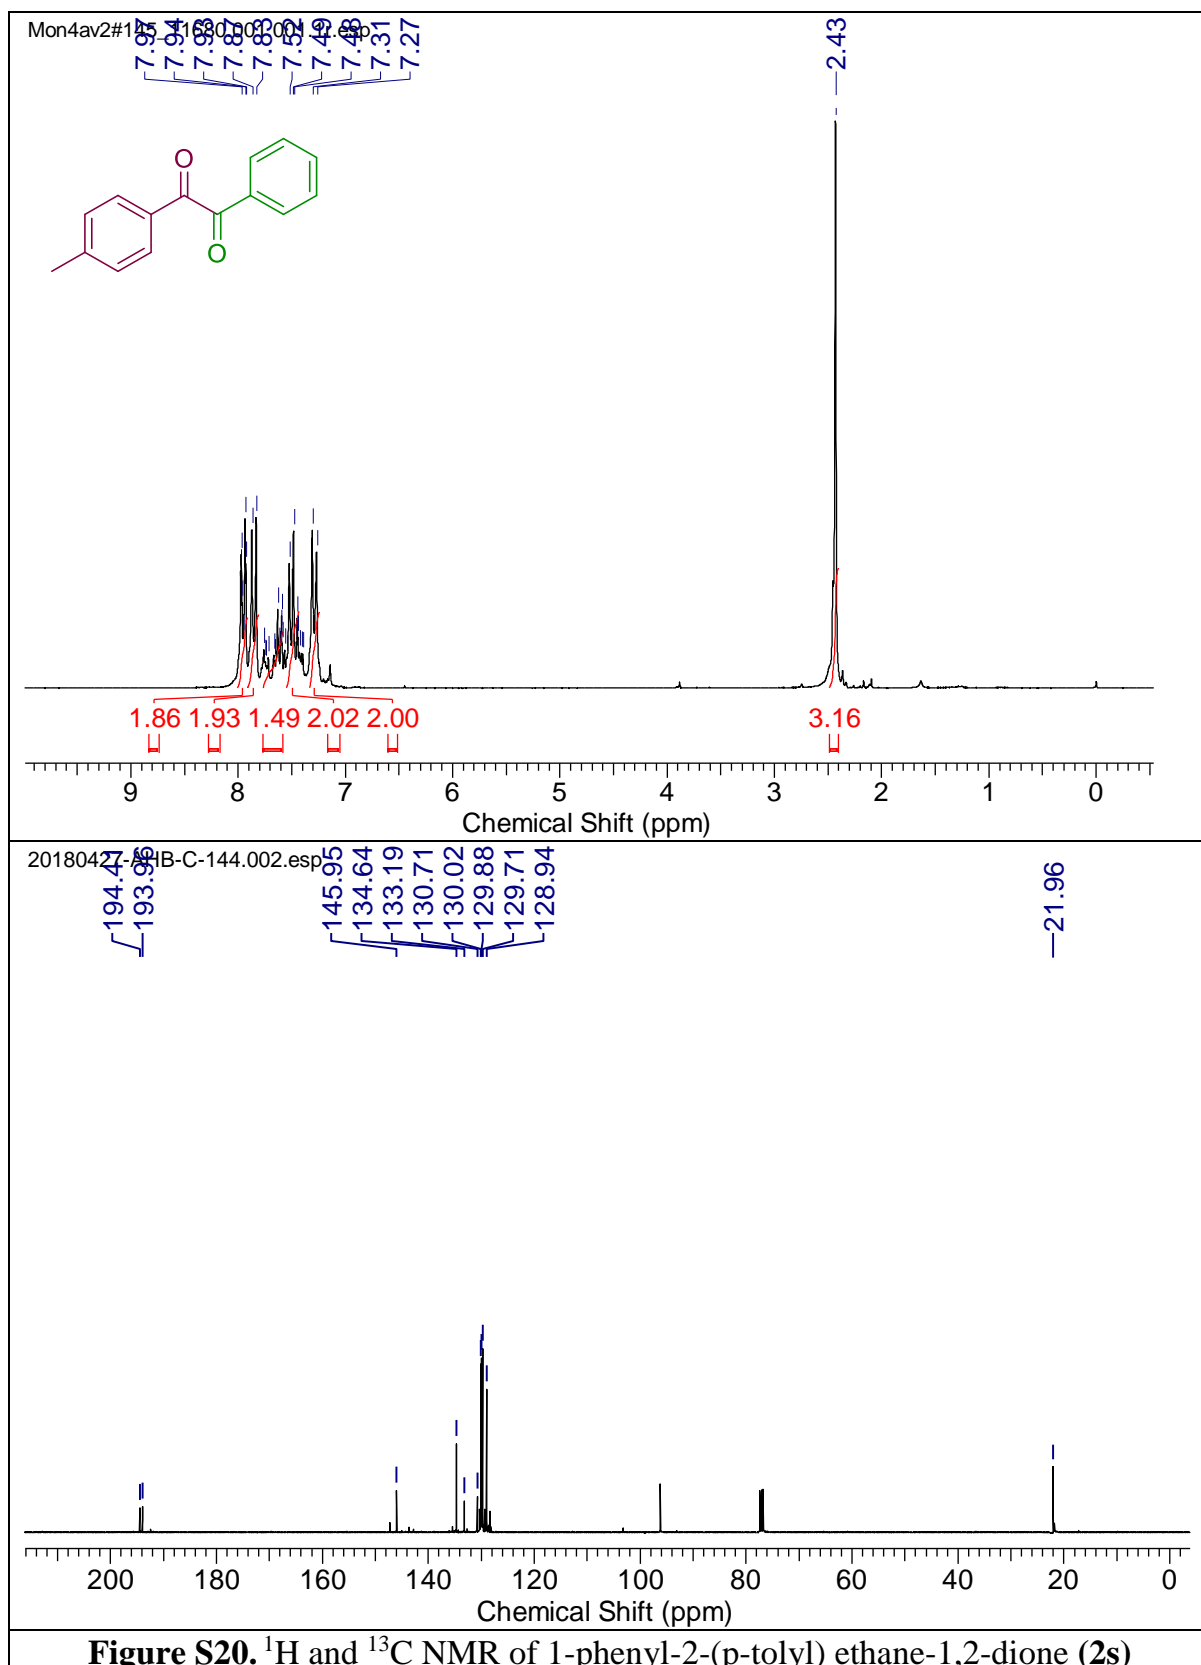

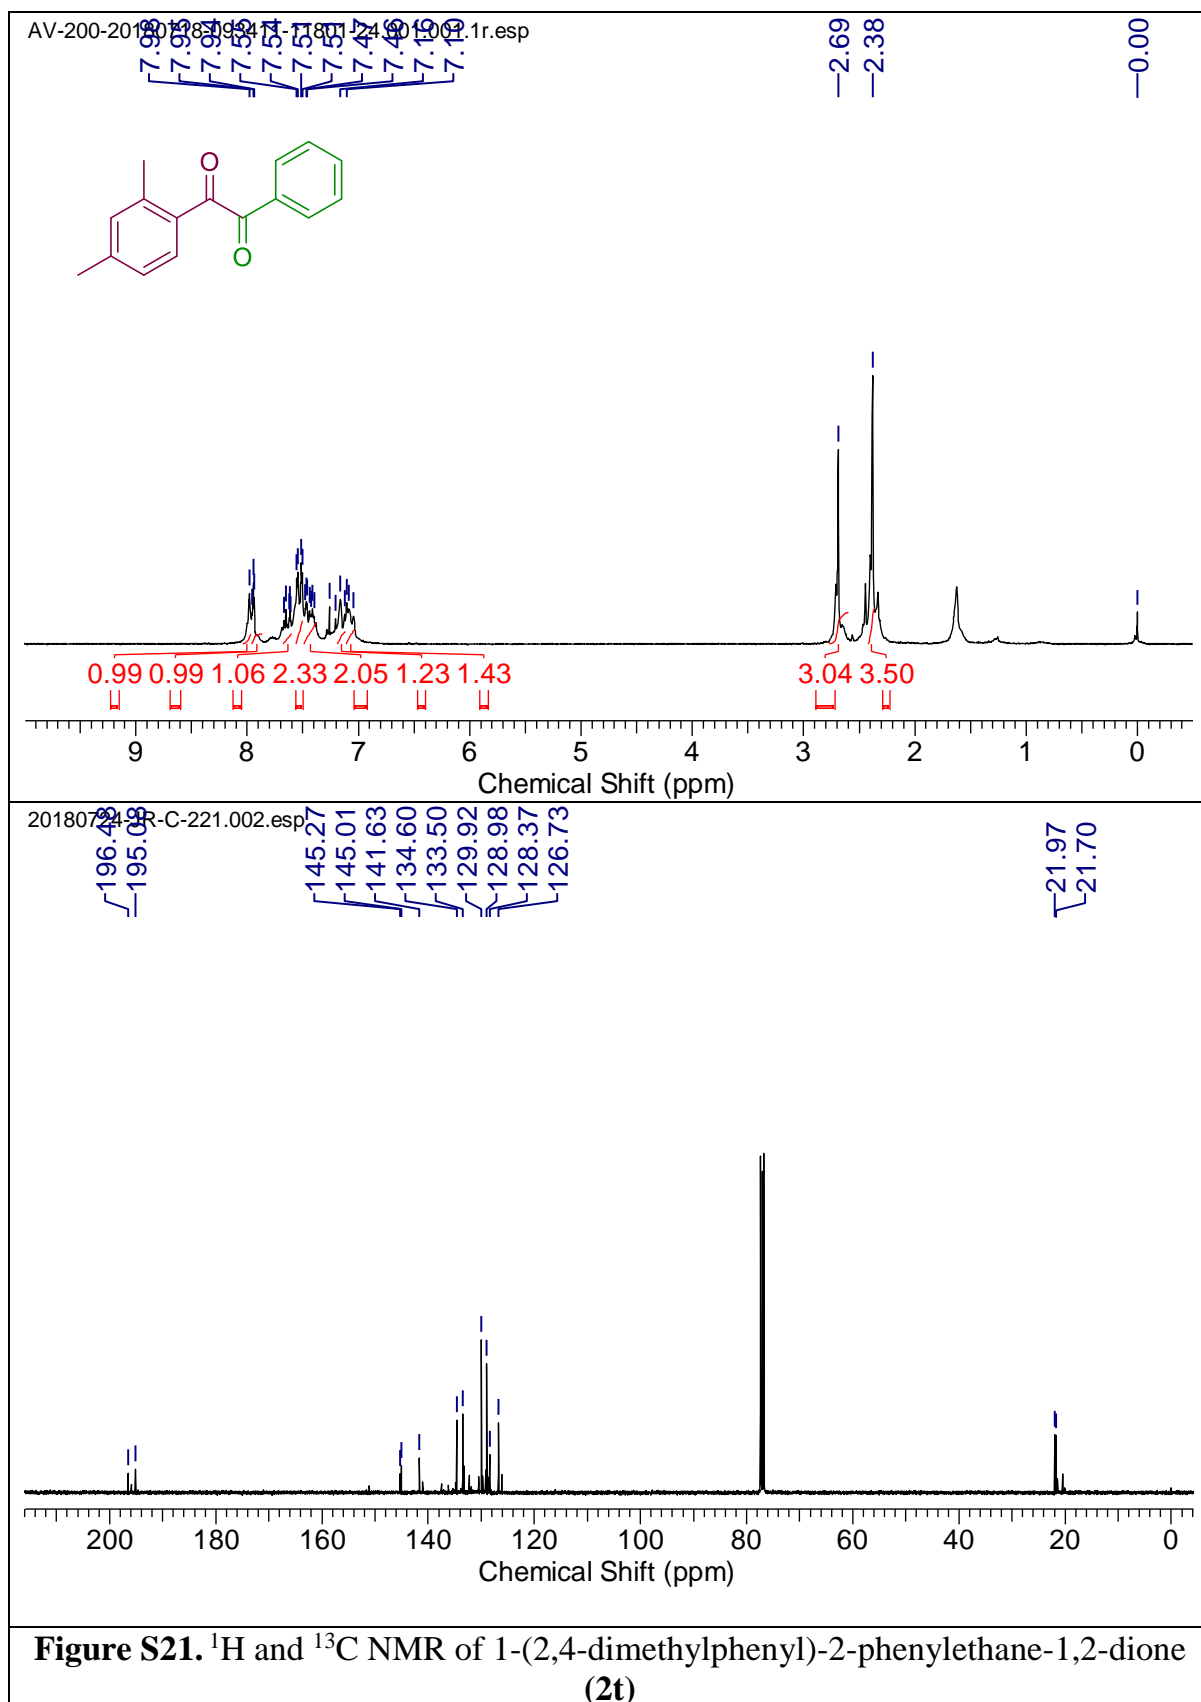

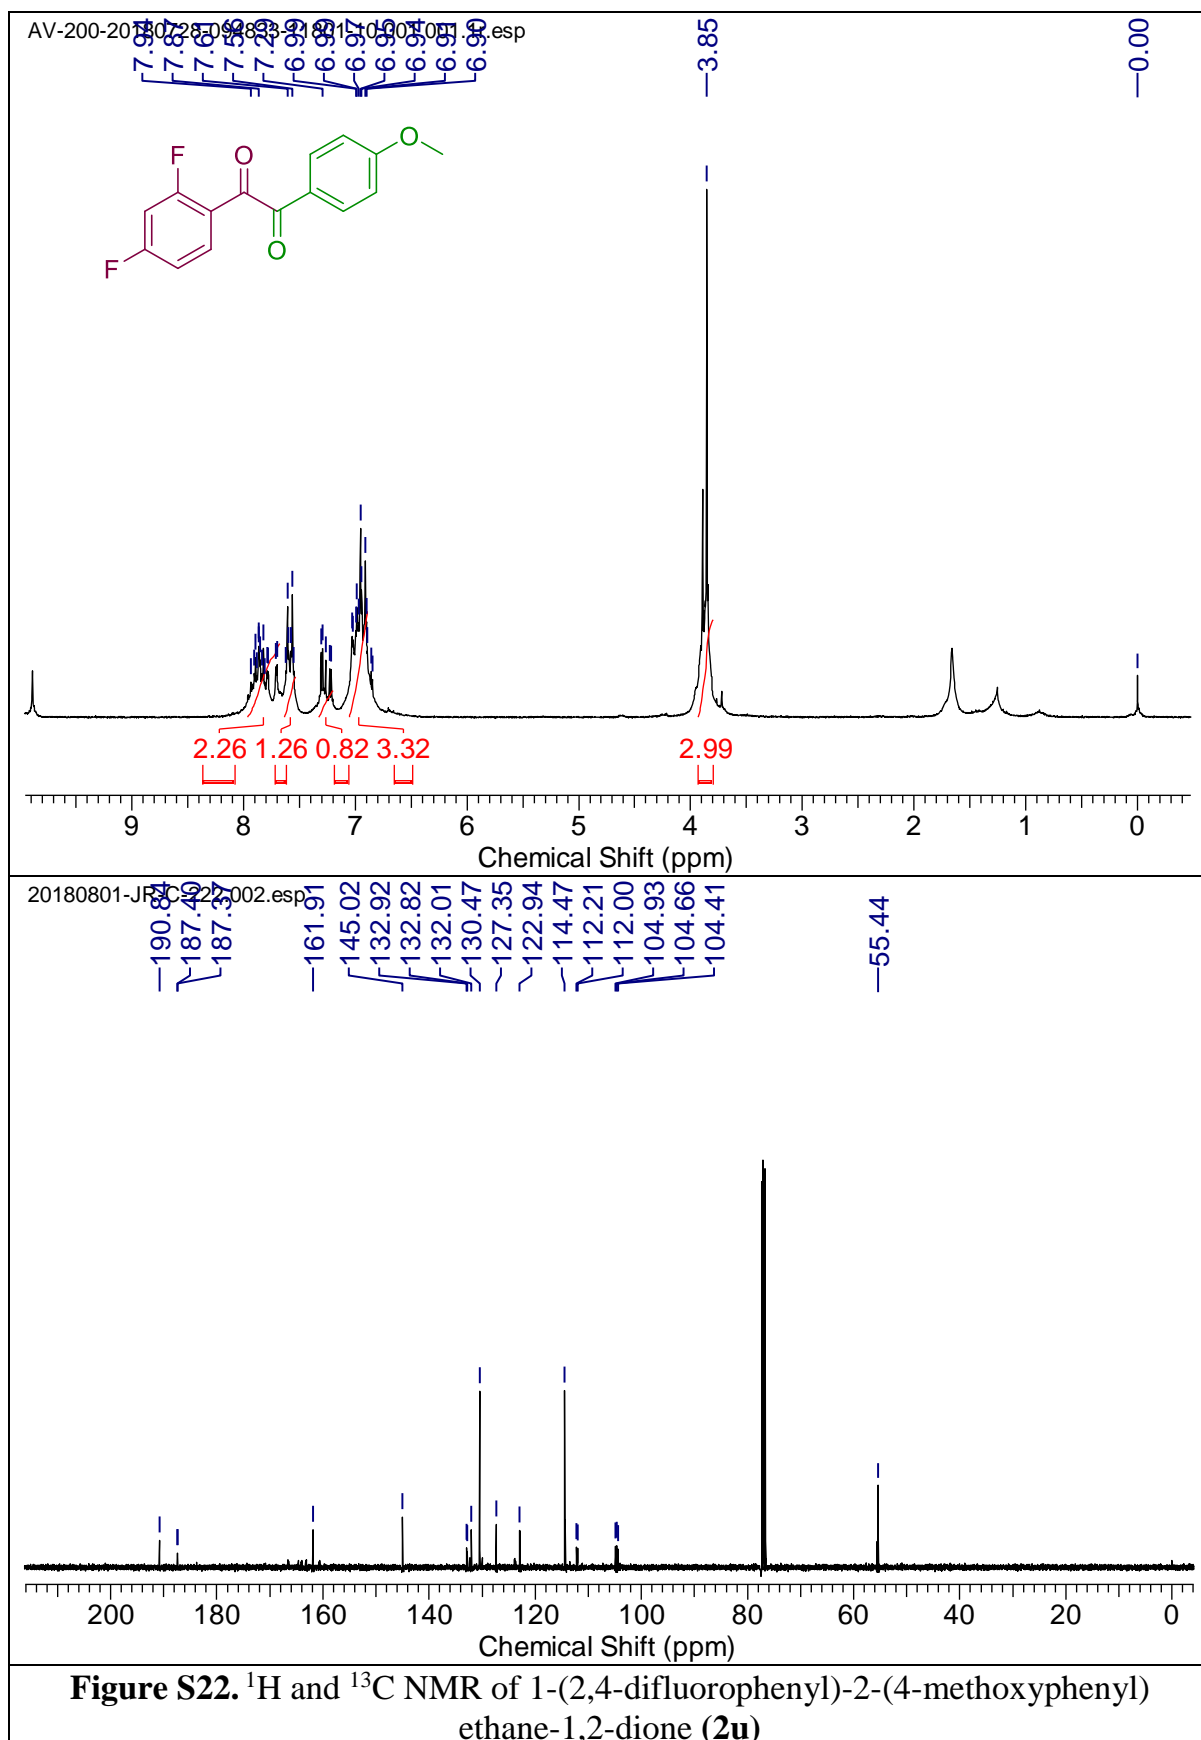



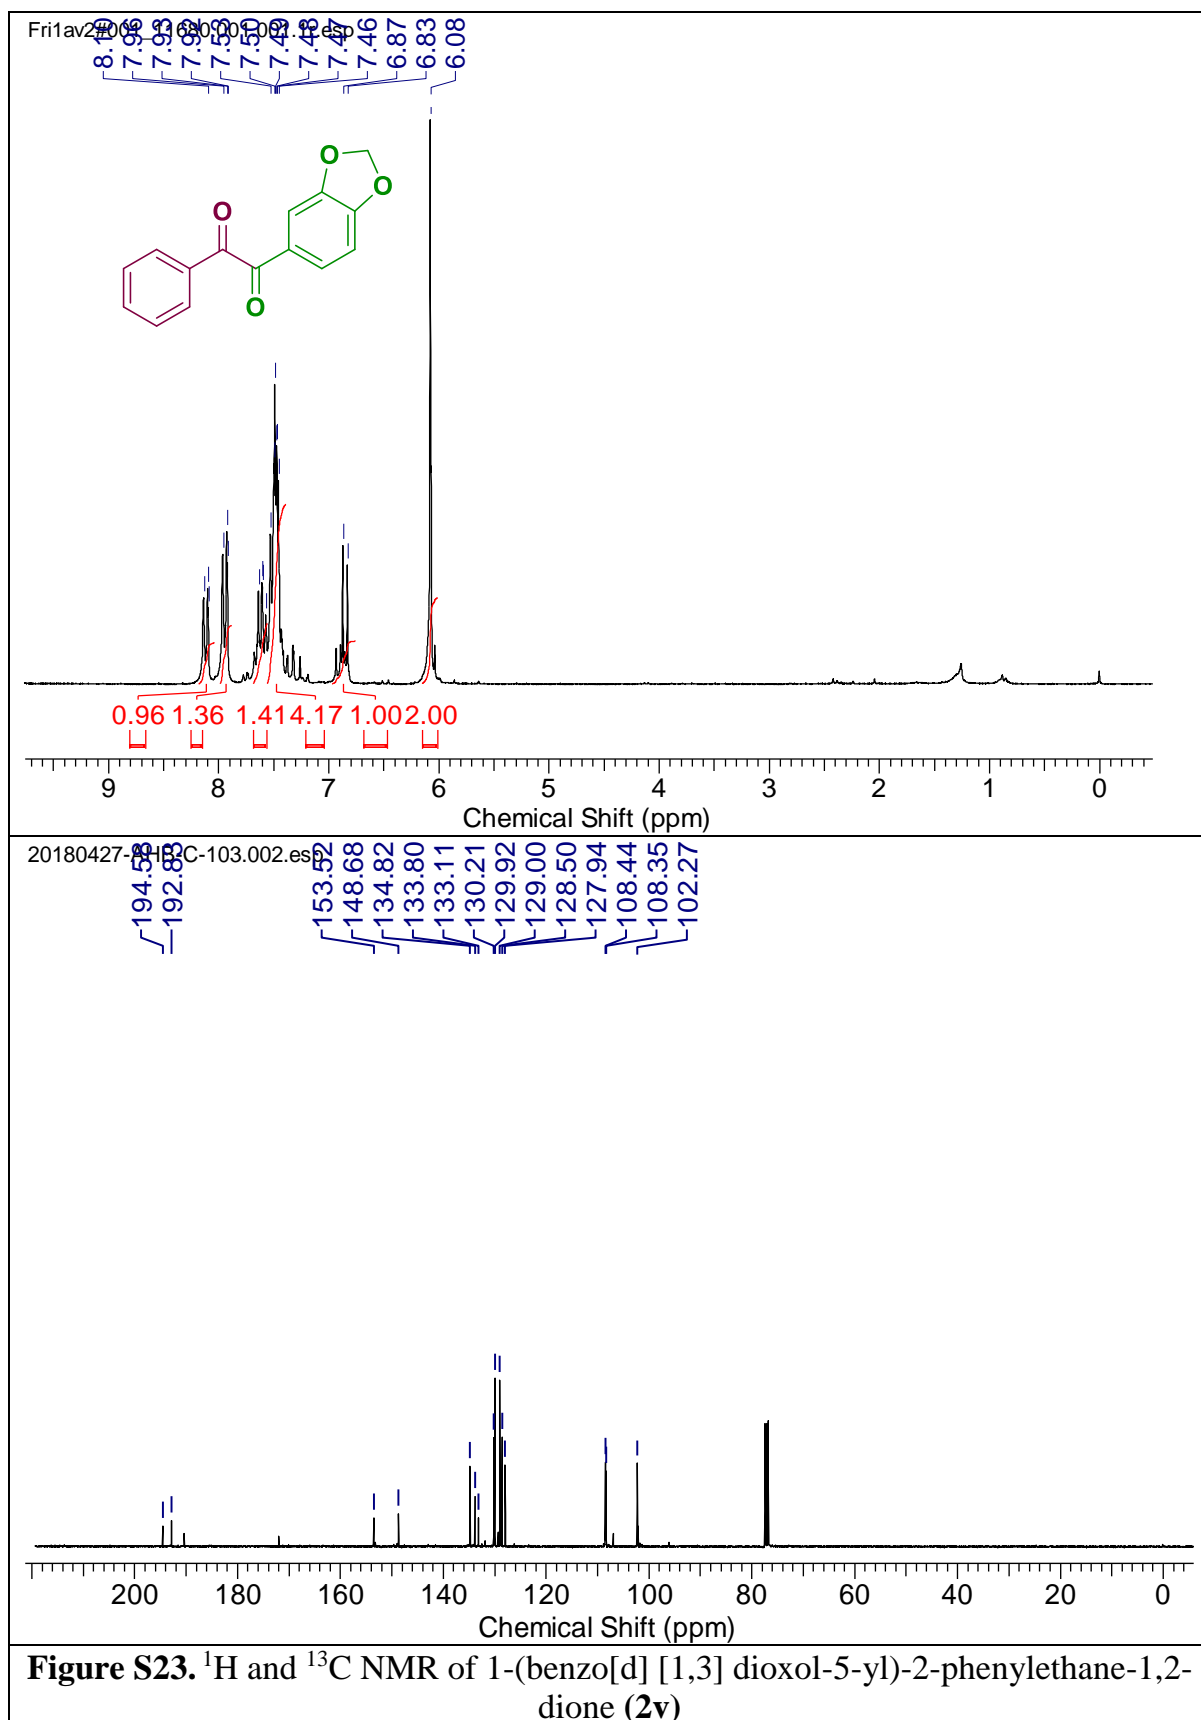

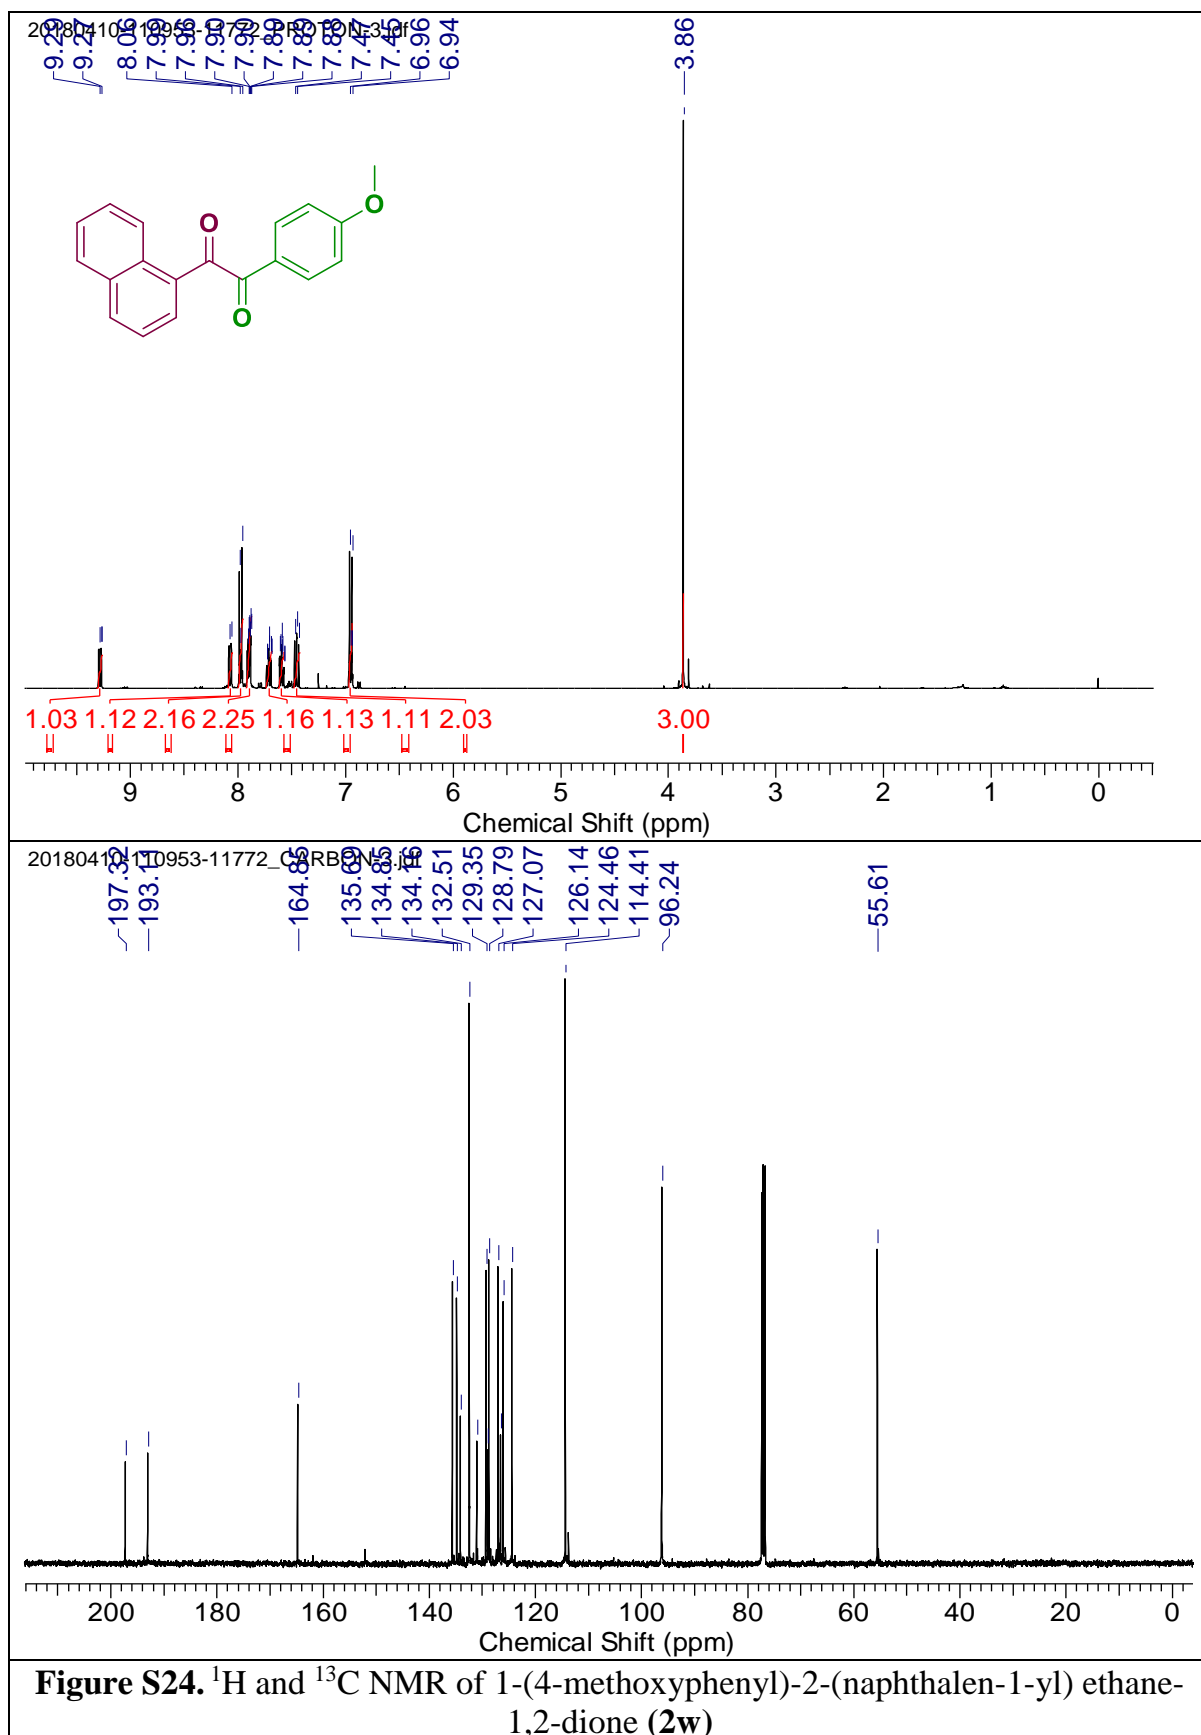

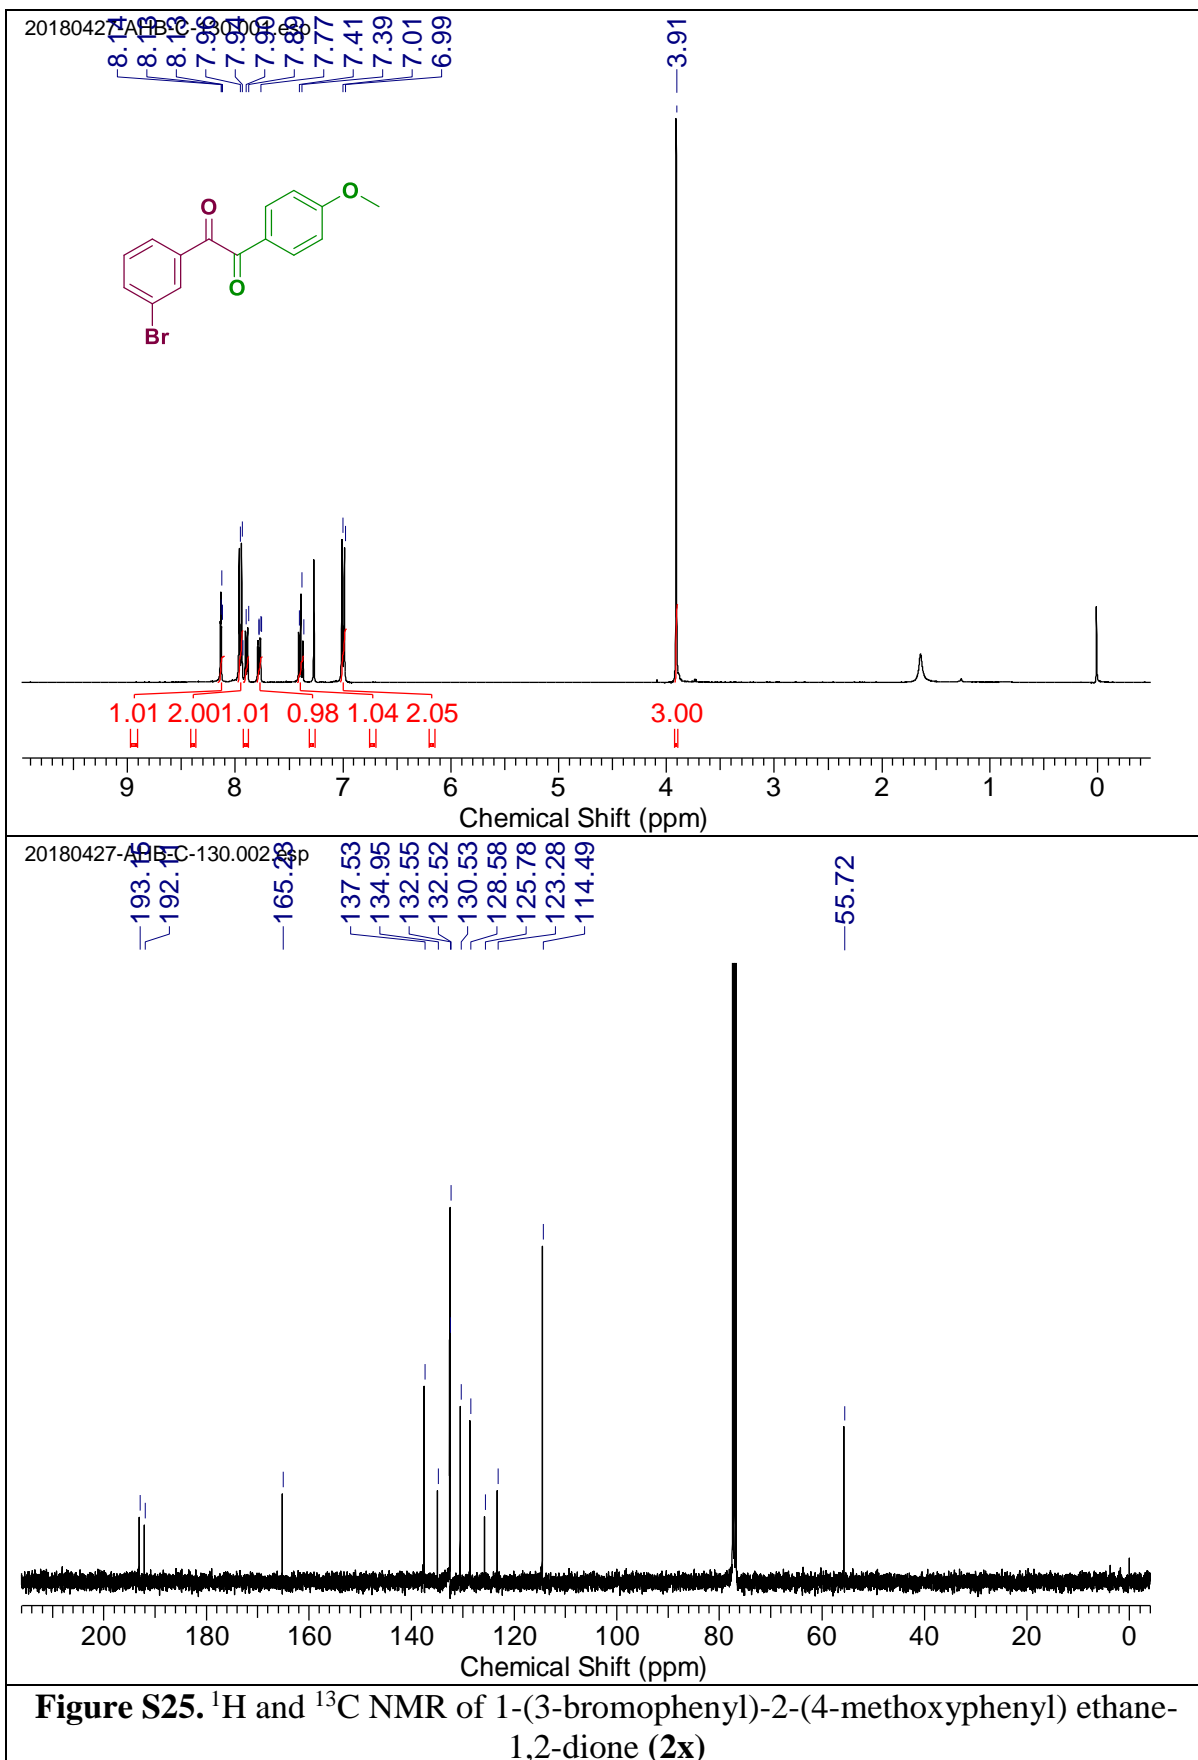

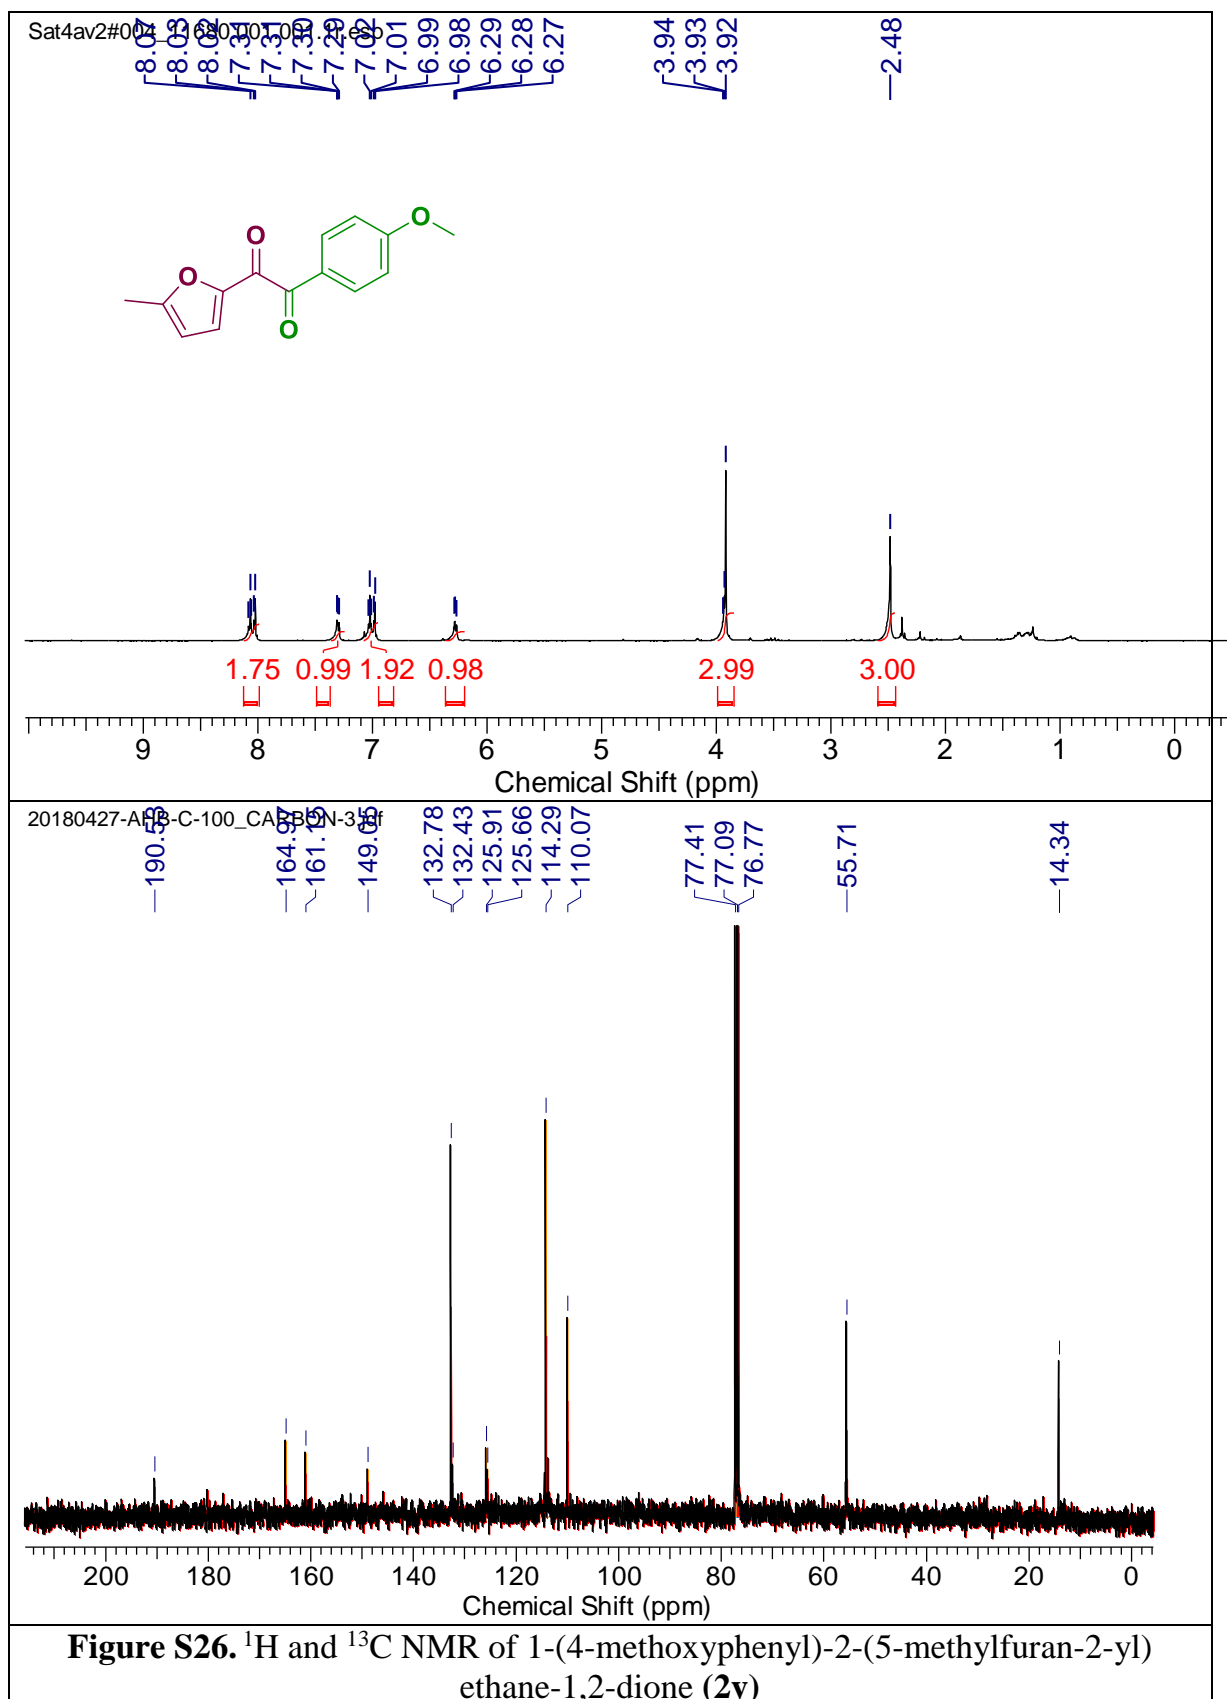

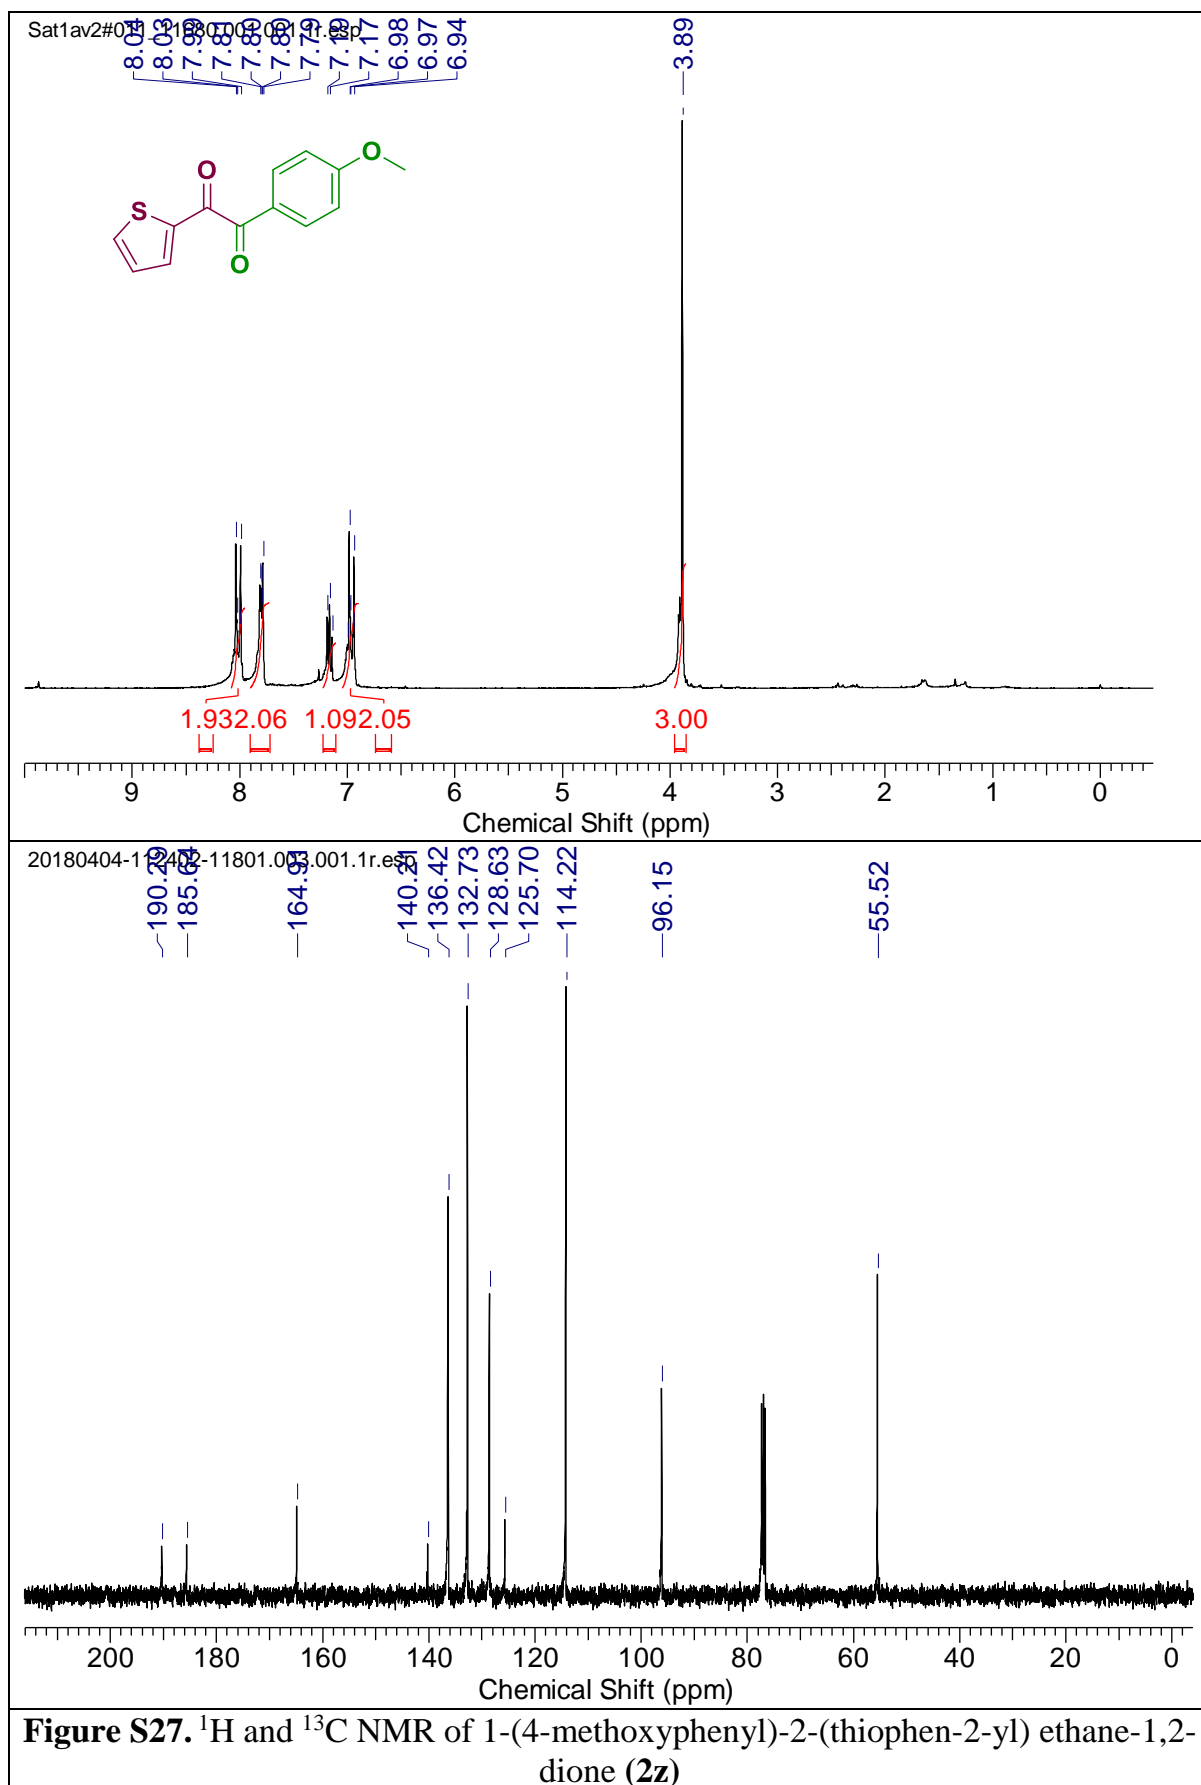

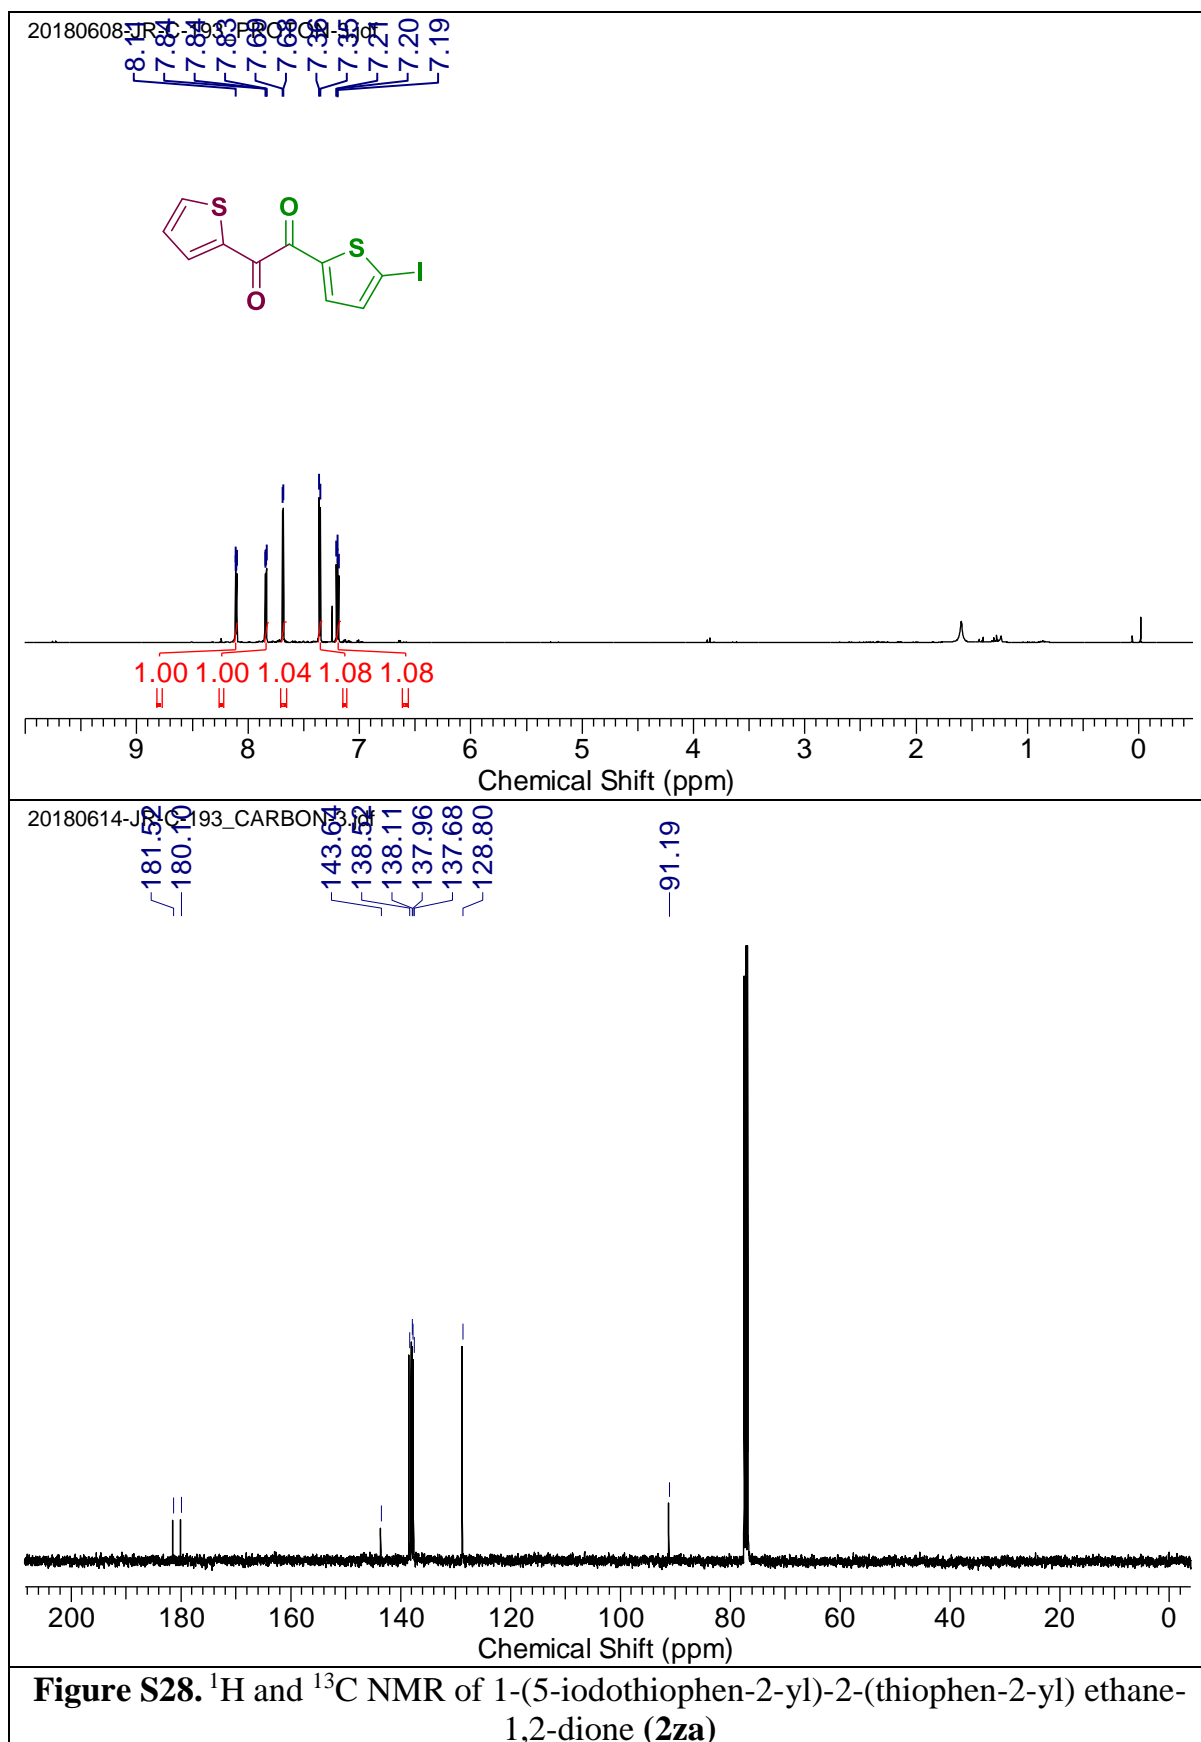

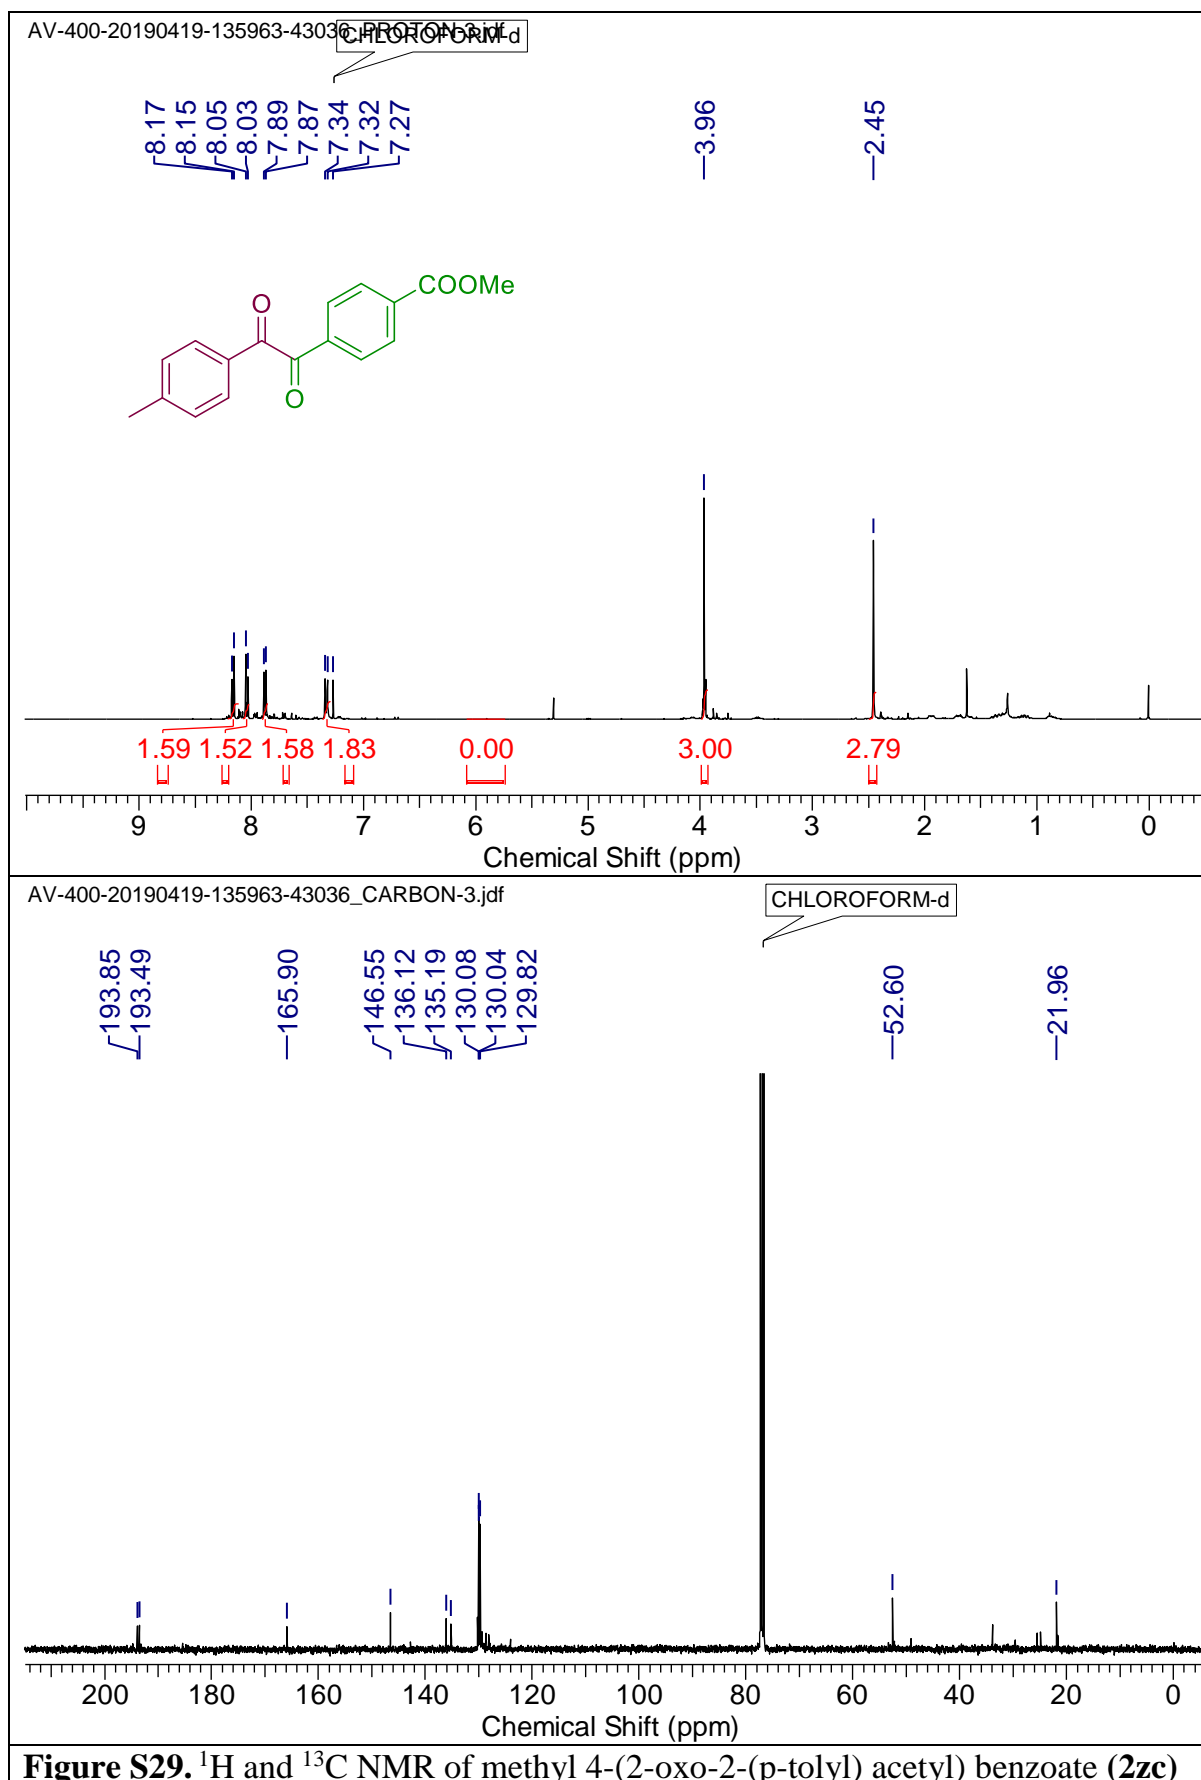

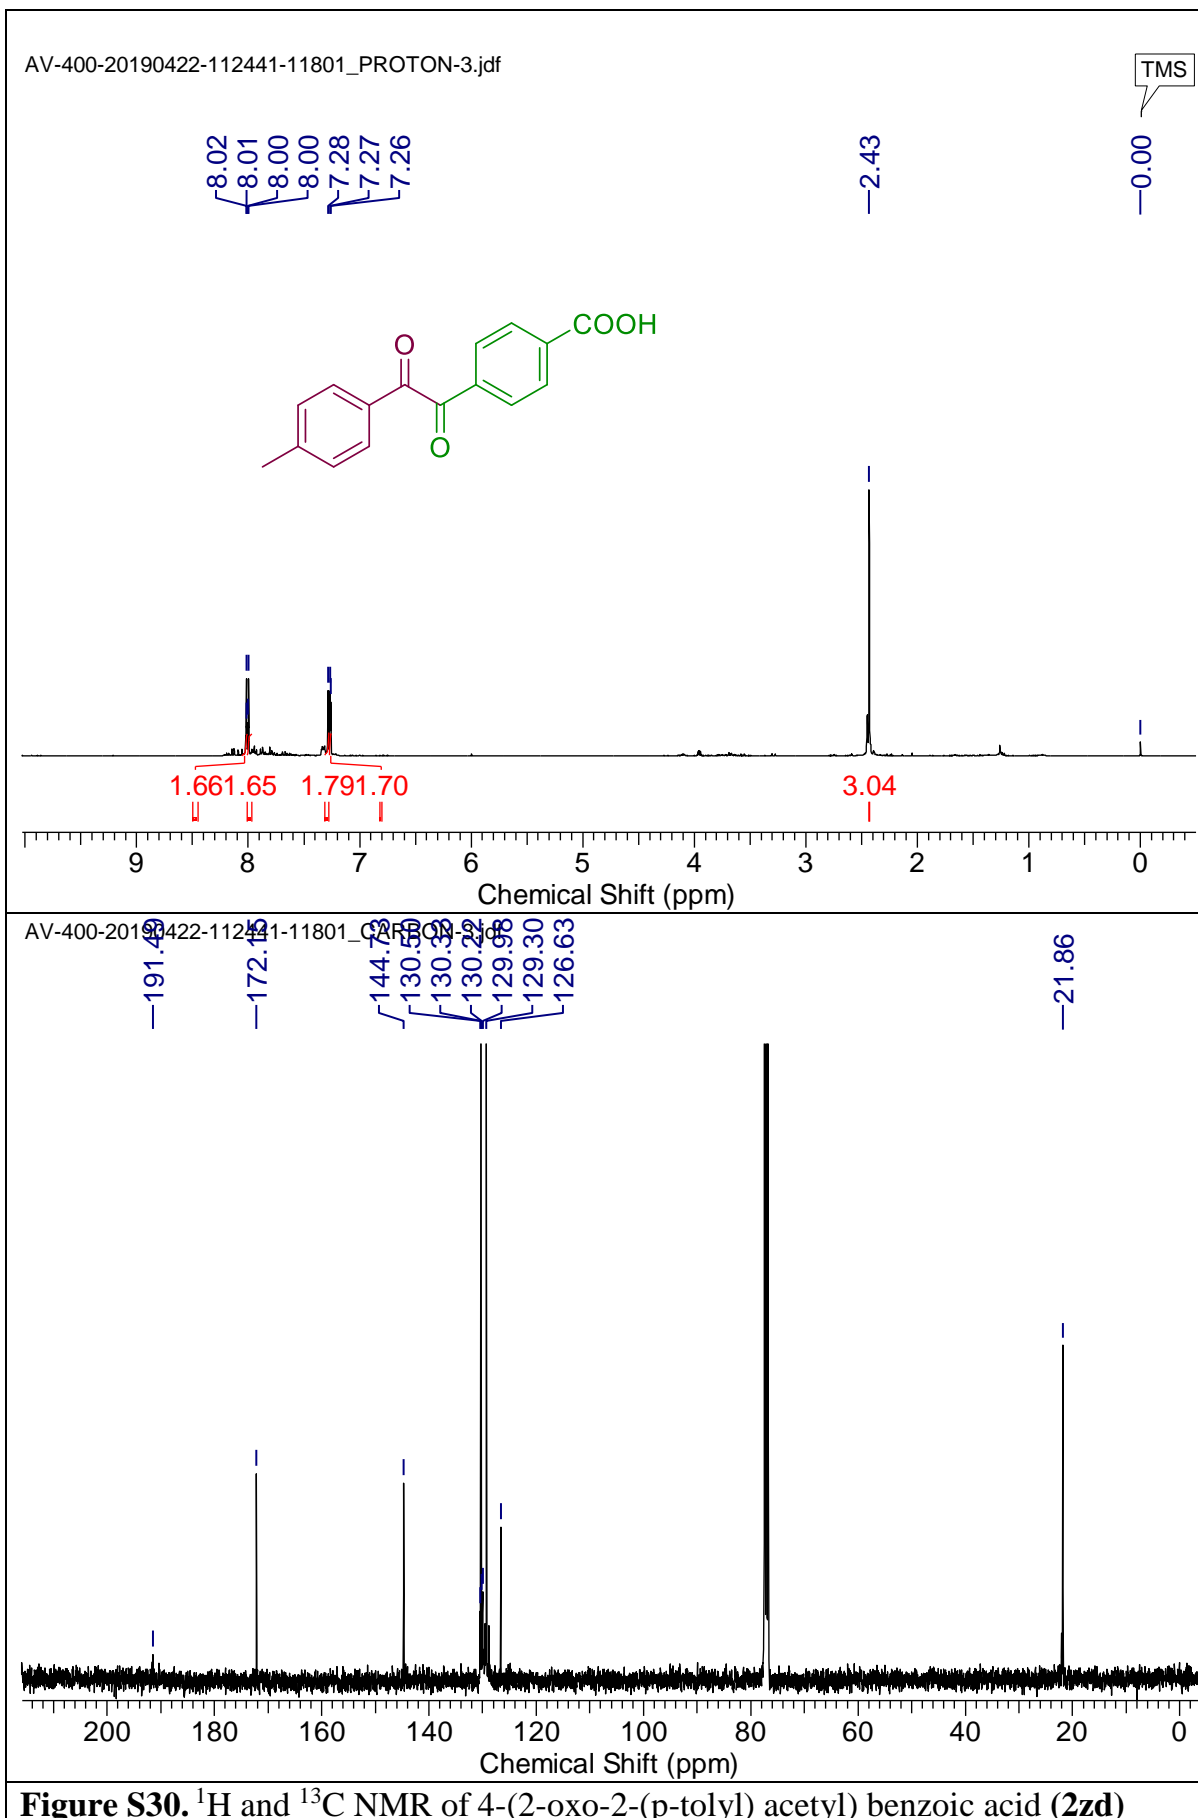



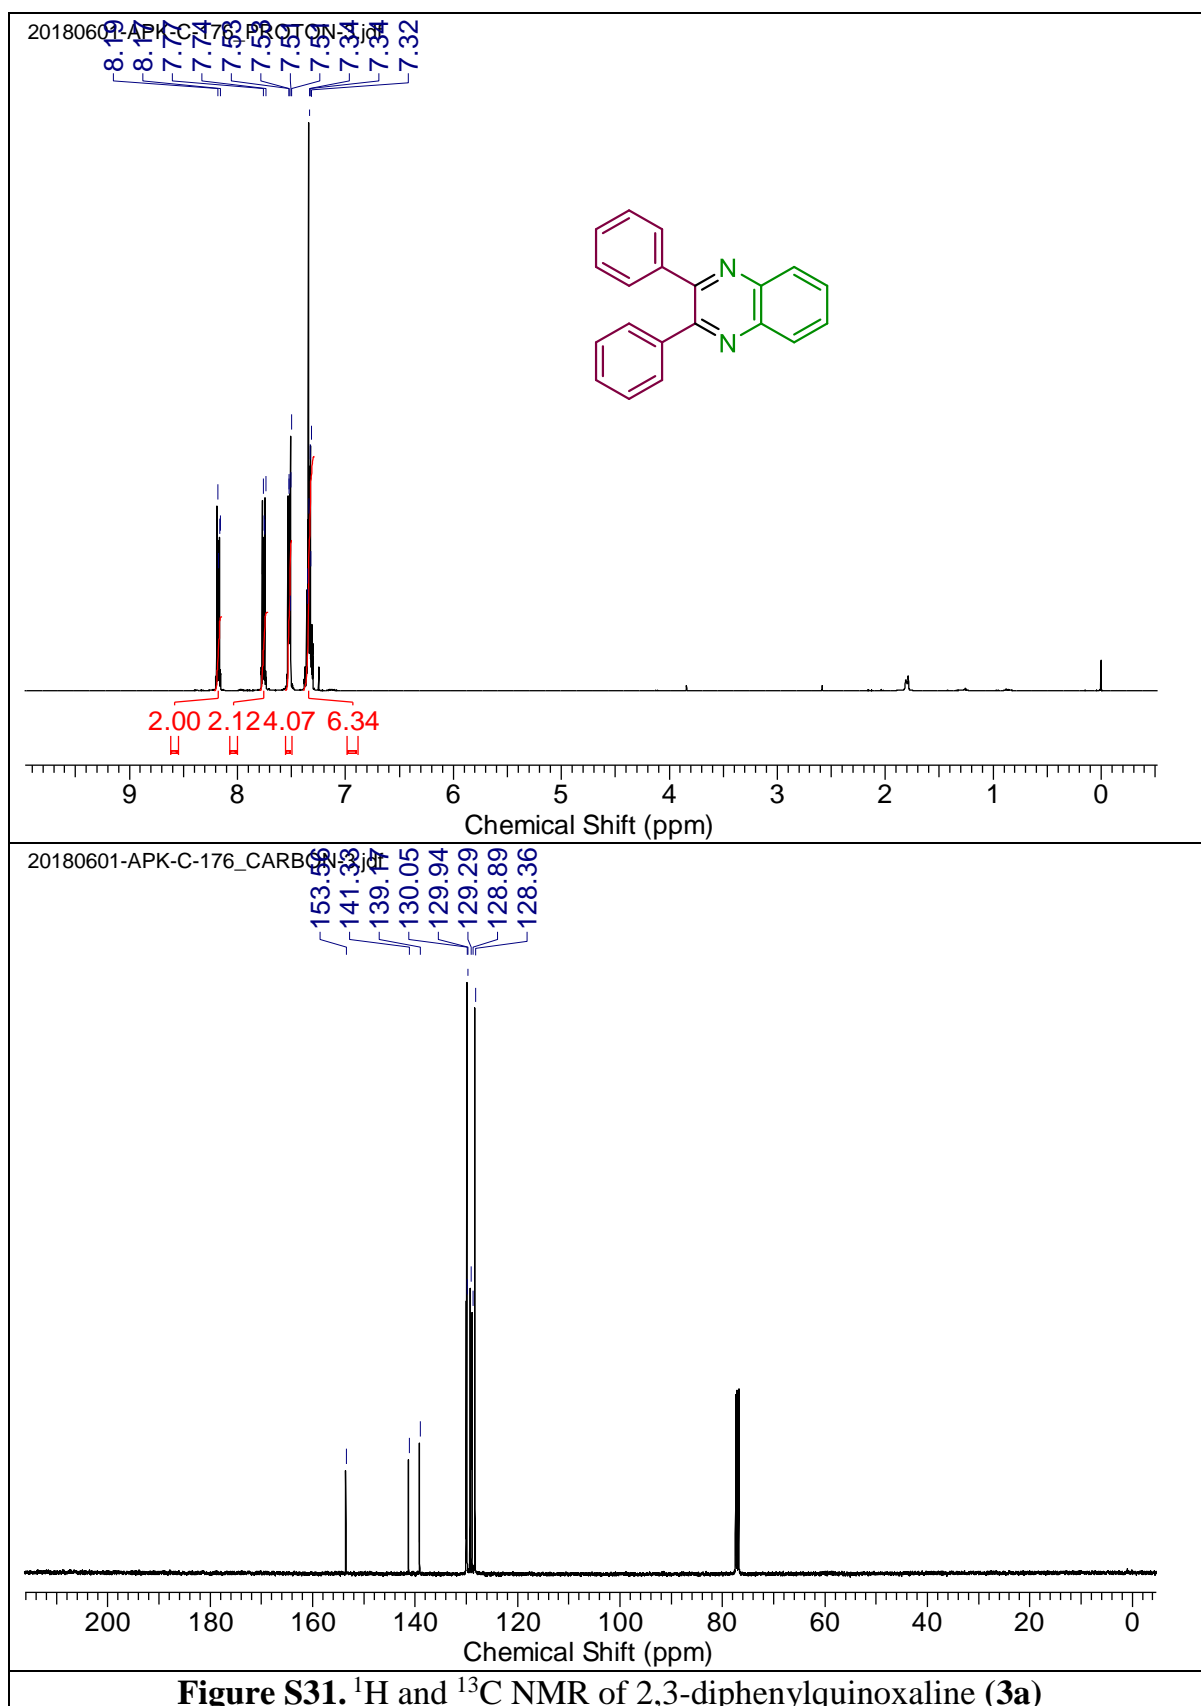

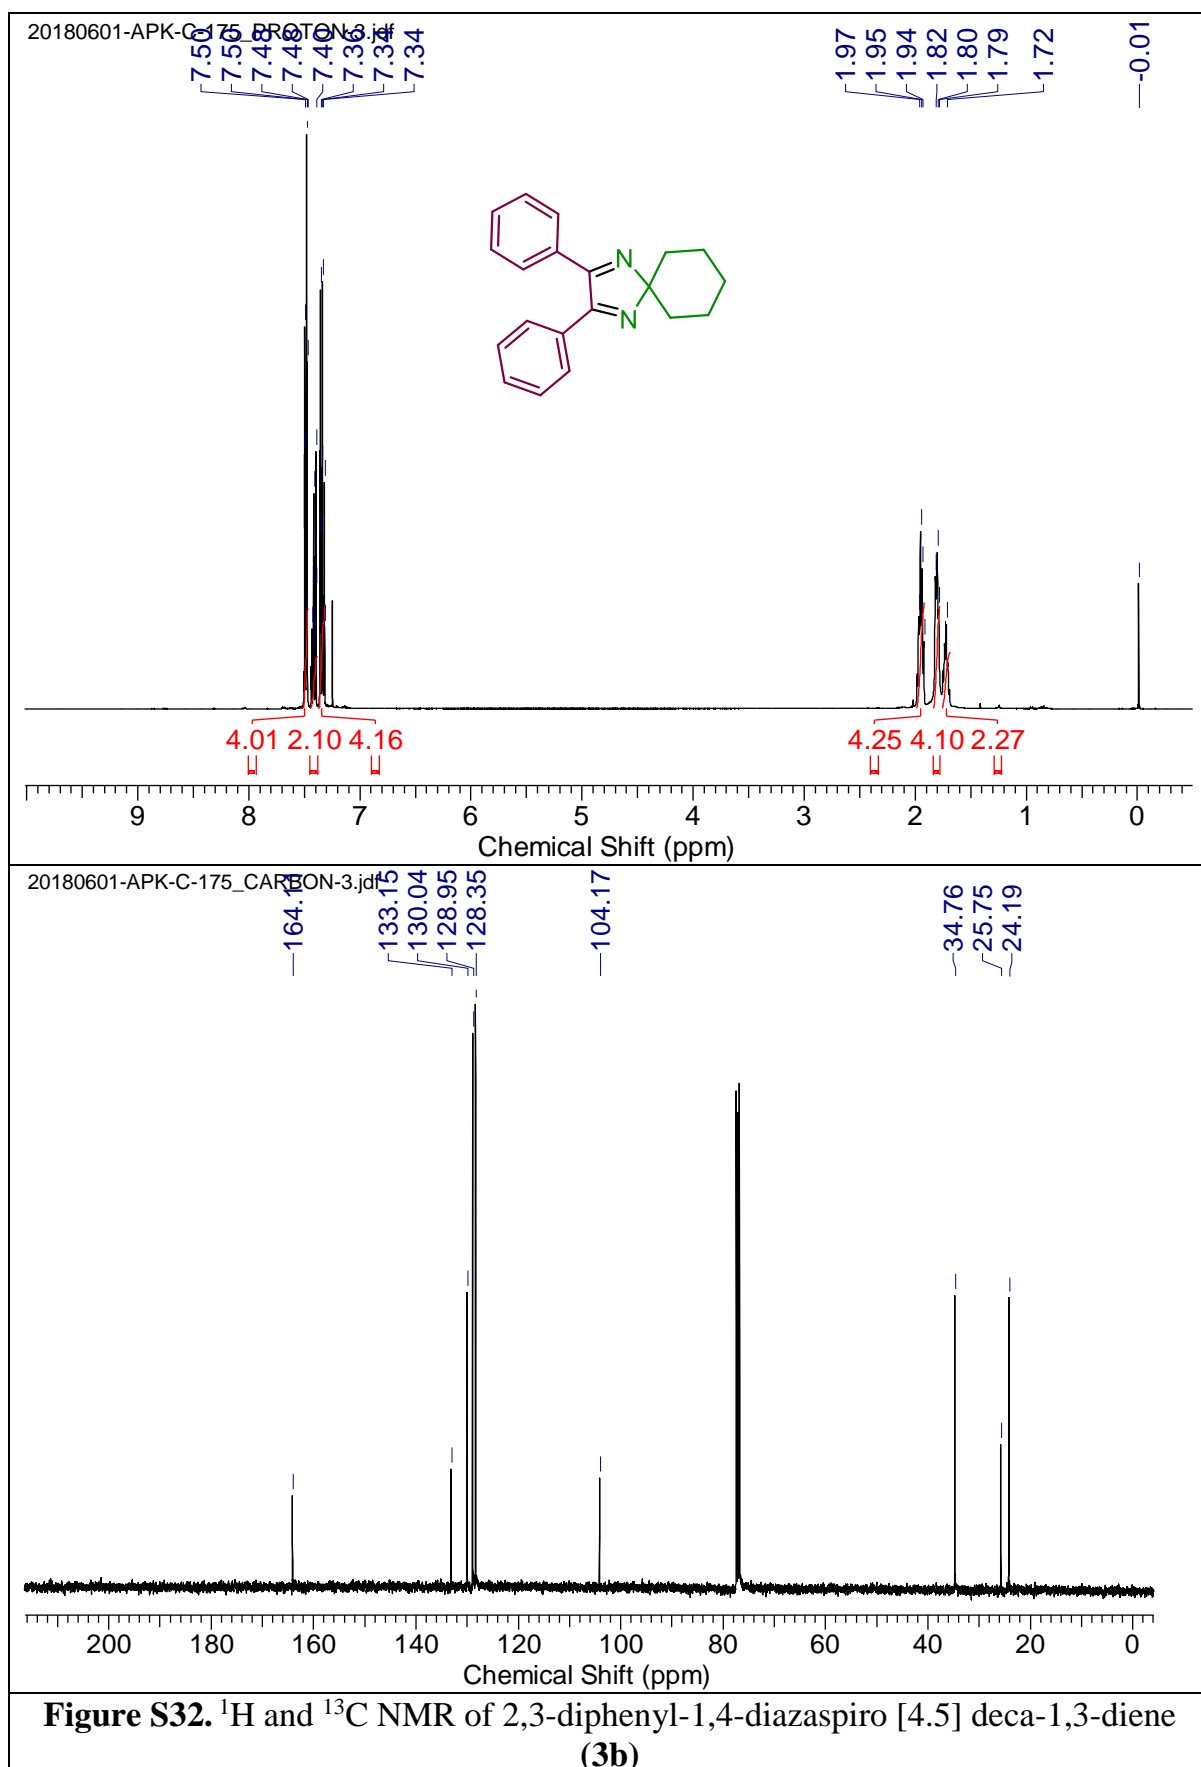

20180820-AHB-C-224\_PROTON-3.jdf

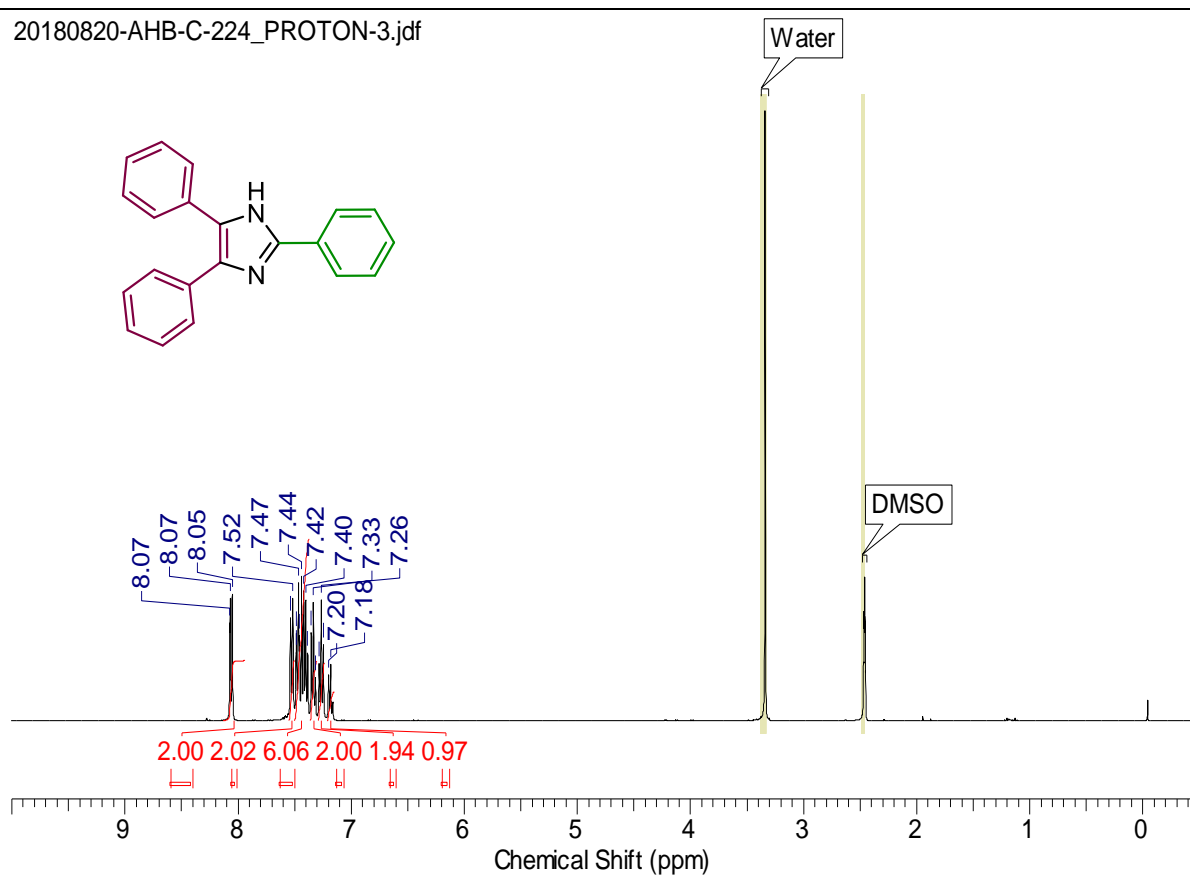

20180820-AHB-C-224\_CARBON-3.jdf

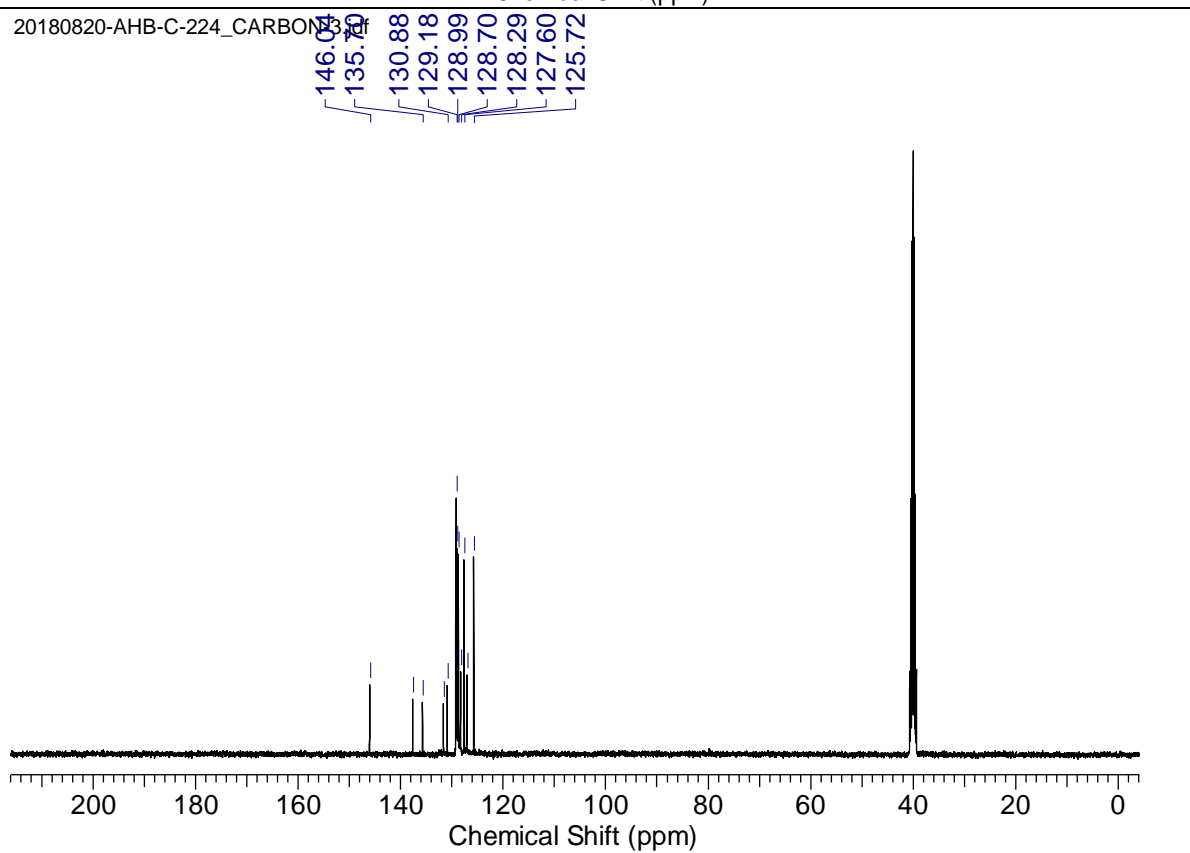

**Figure S33.**  $^1\text{H}$  and  $^{13}\text{C}$  NMR of 2,4,5-triphenyl-1H-imidazole (**3c**)

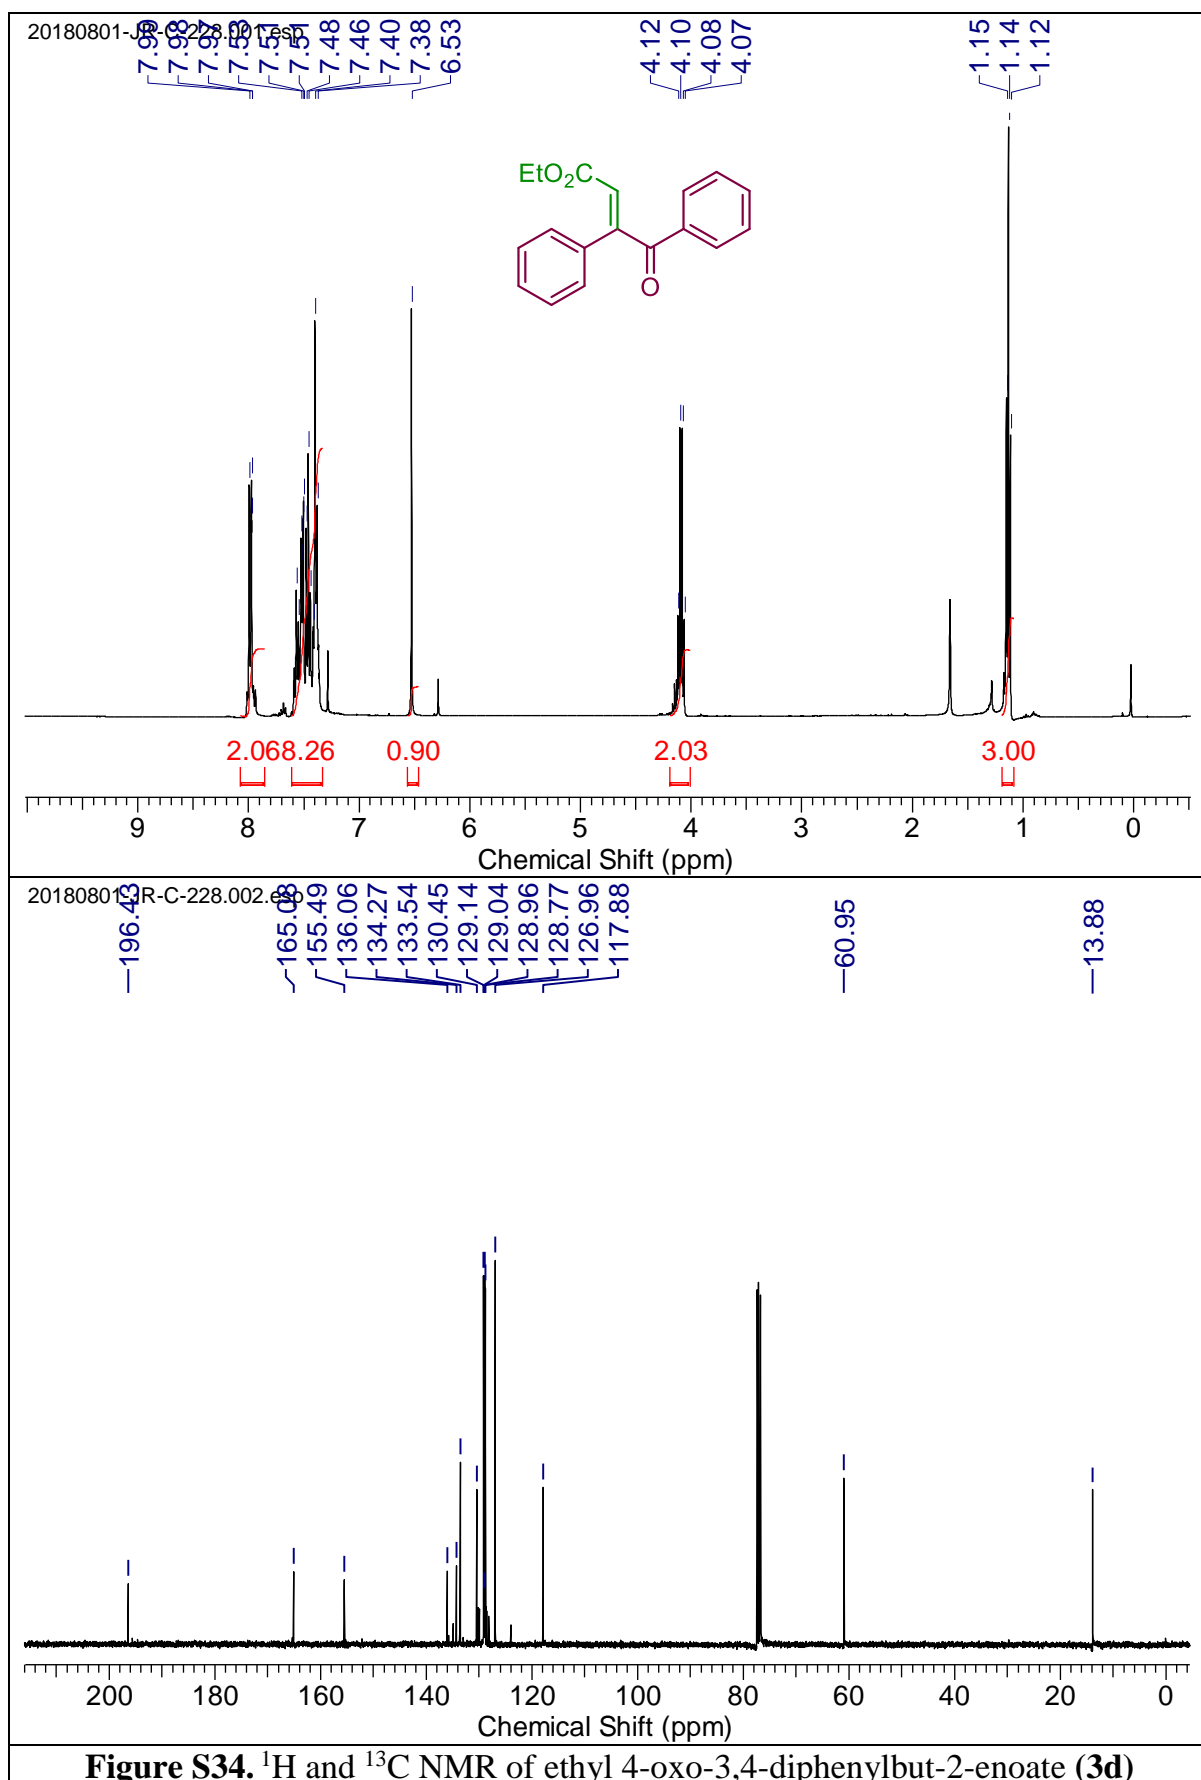

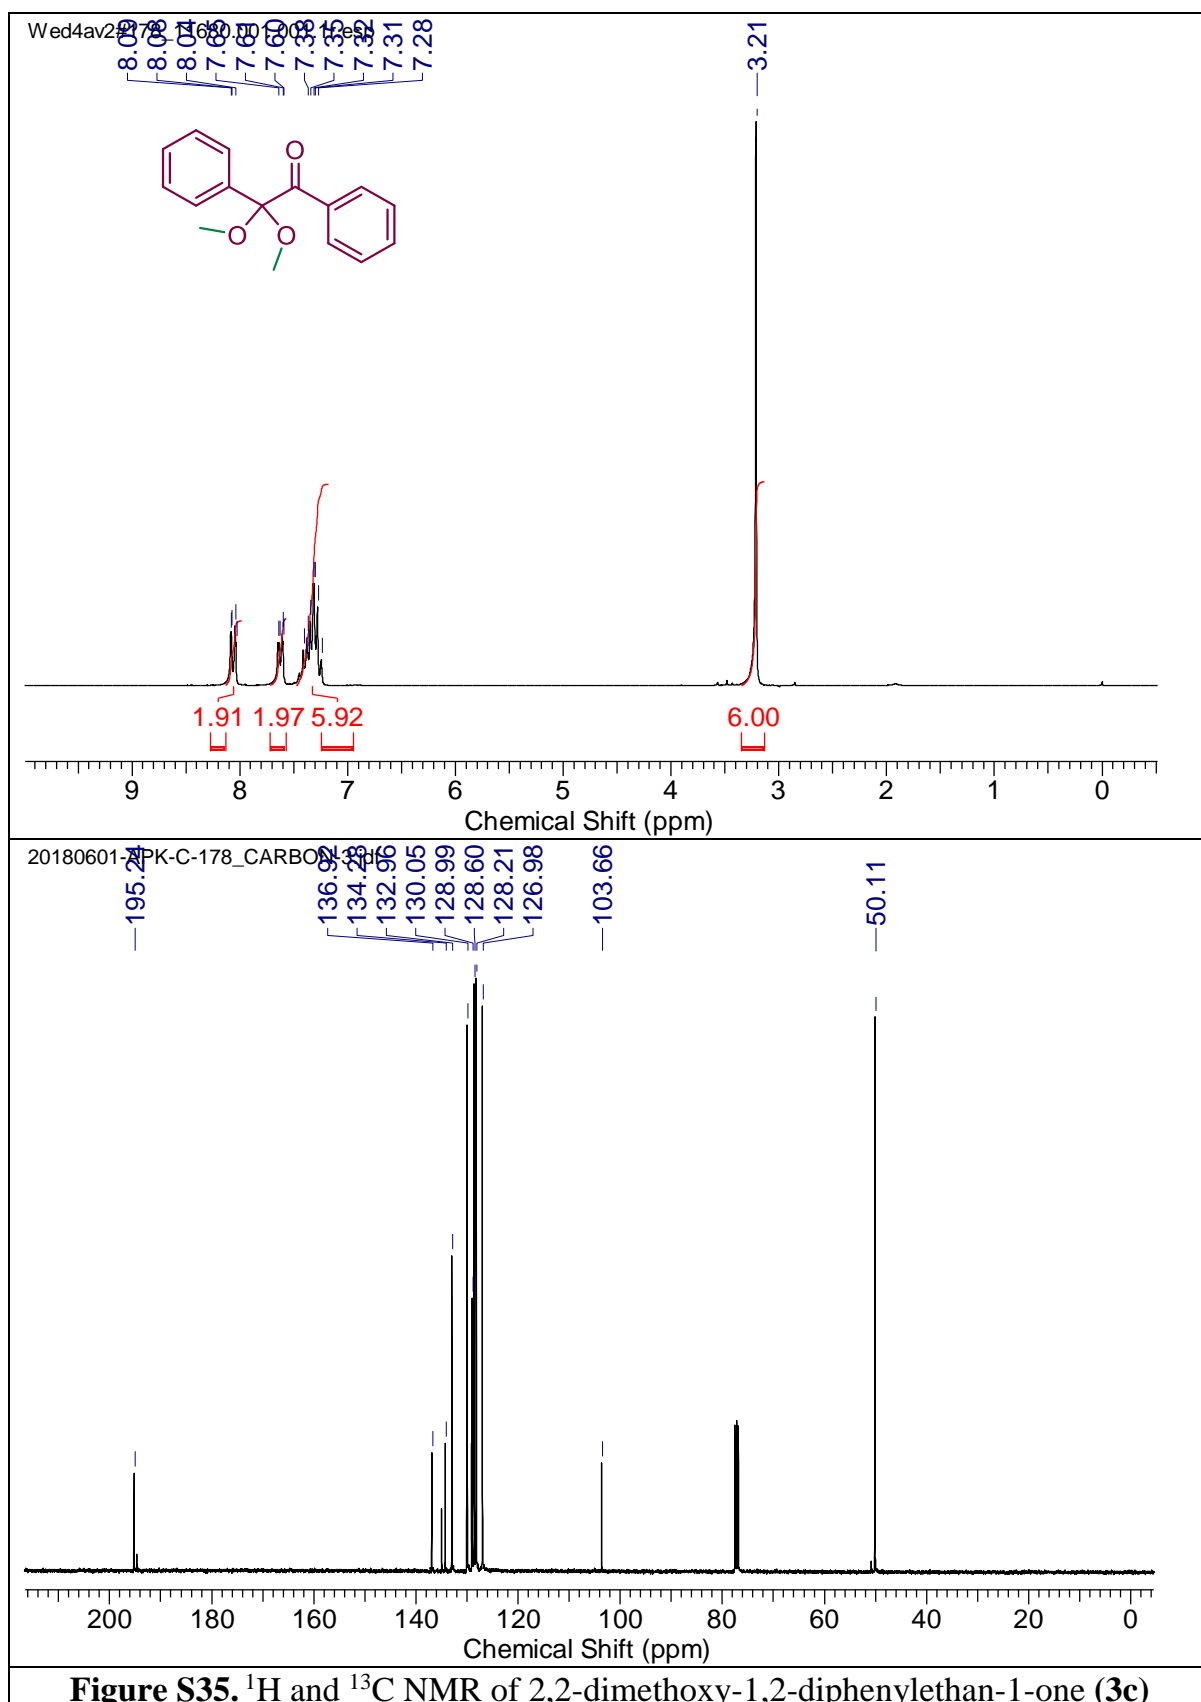

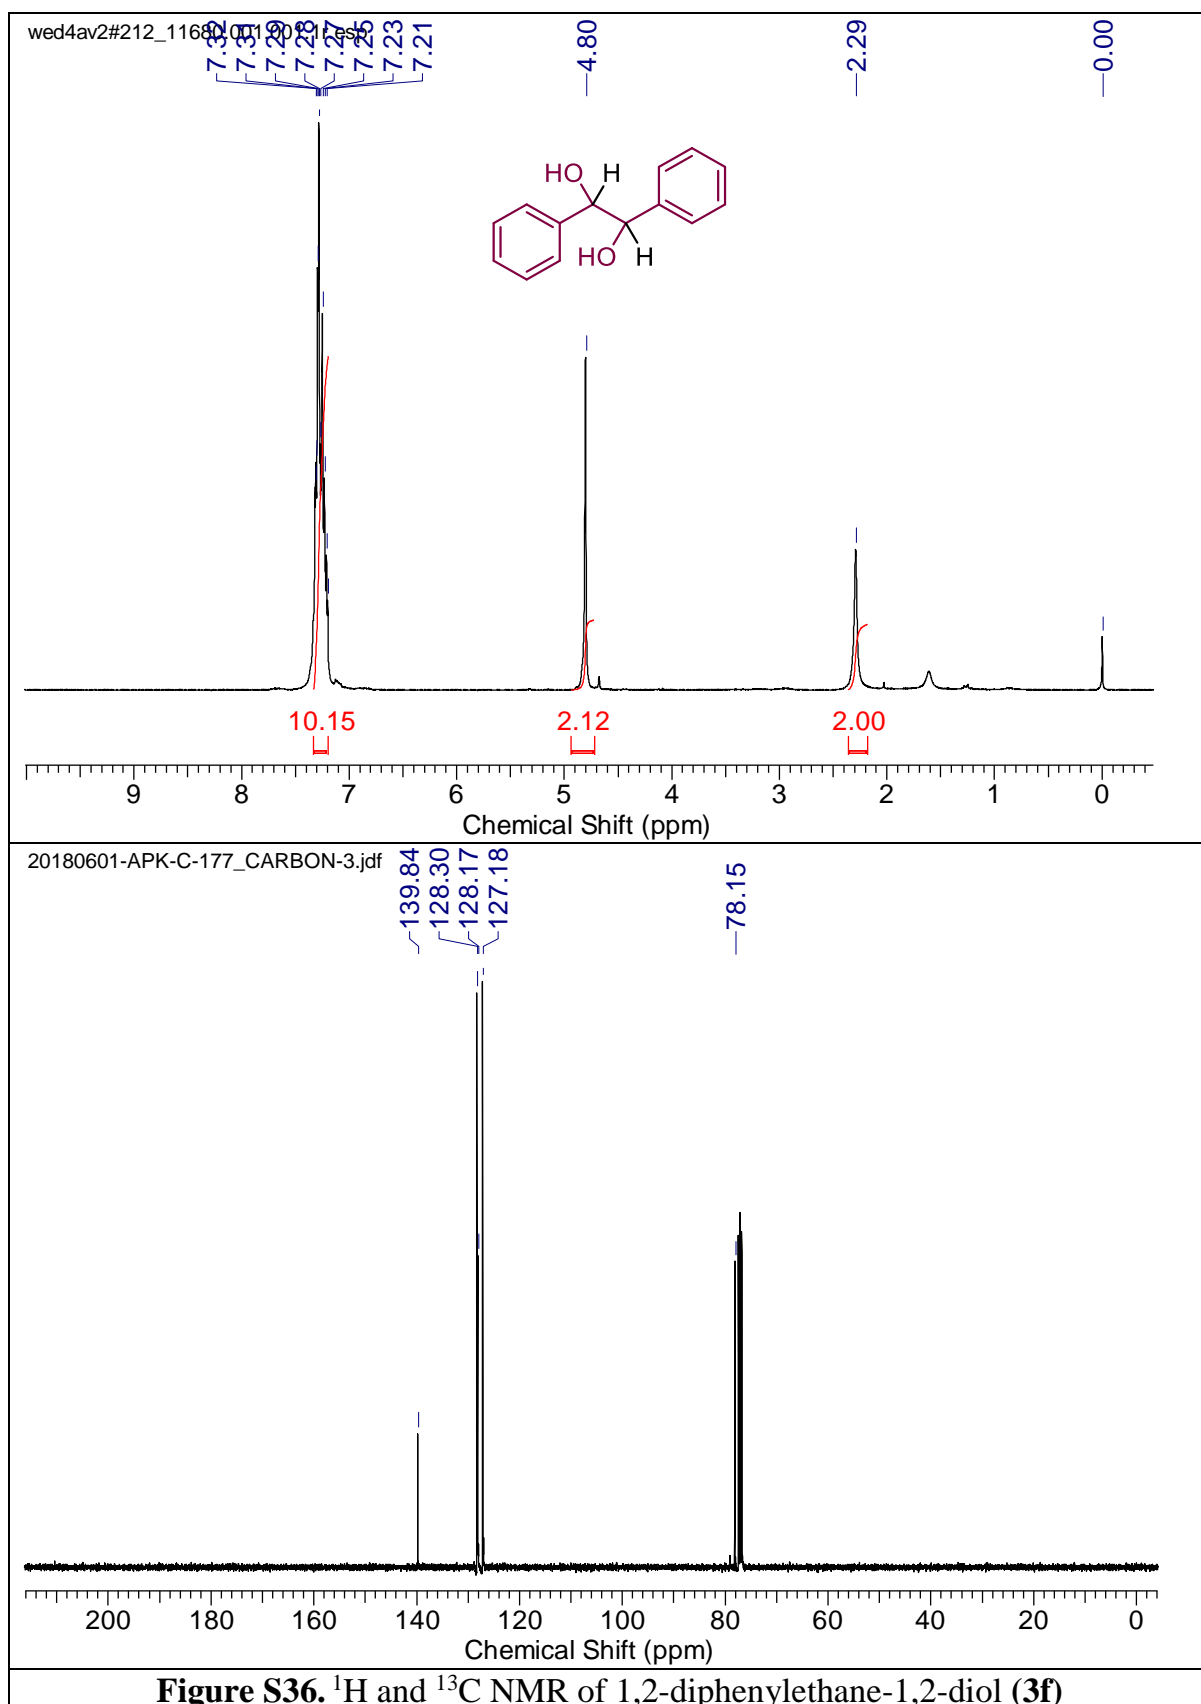

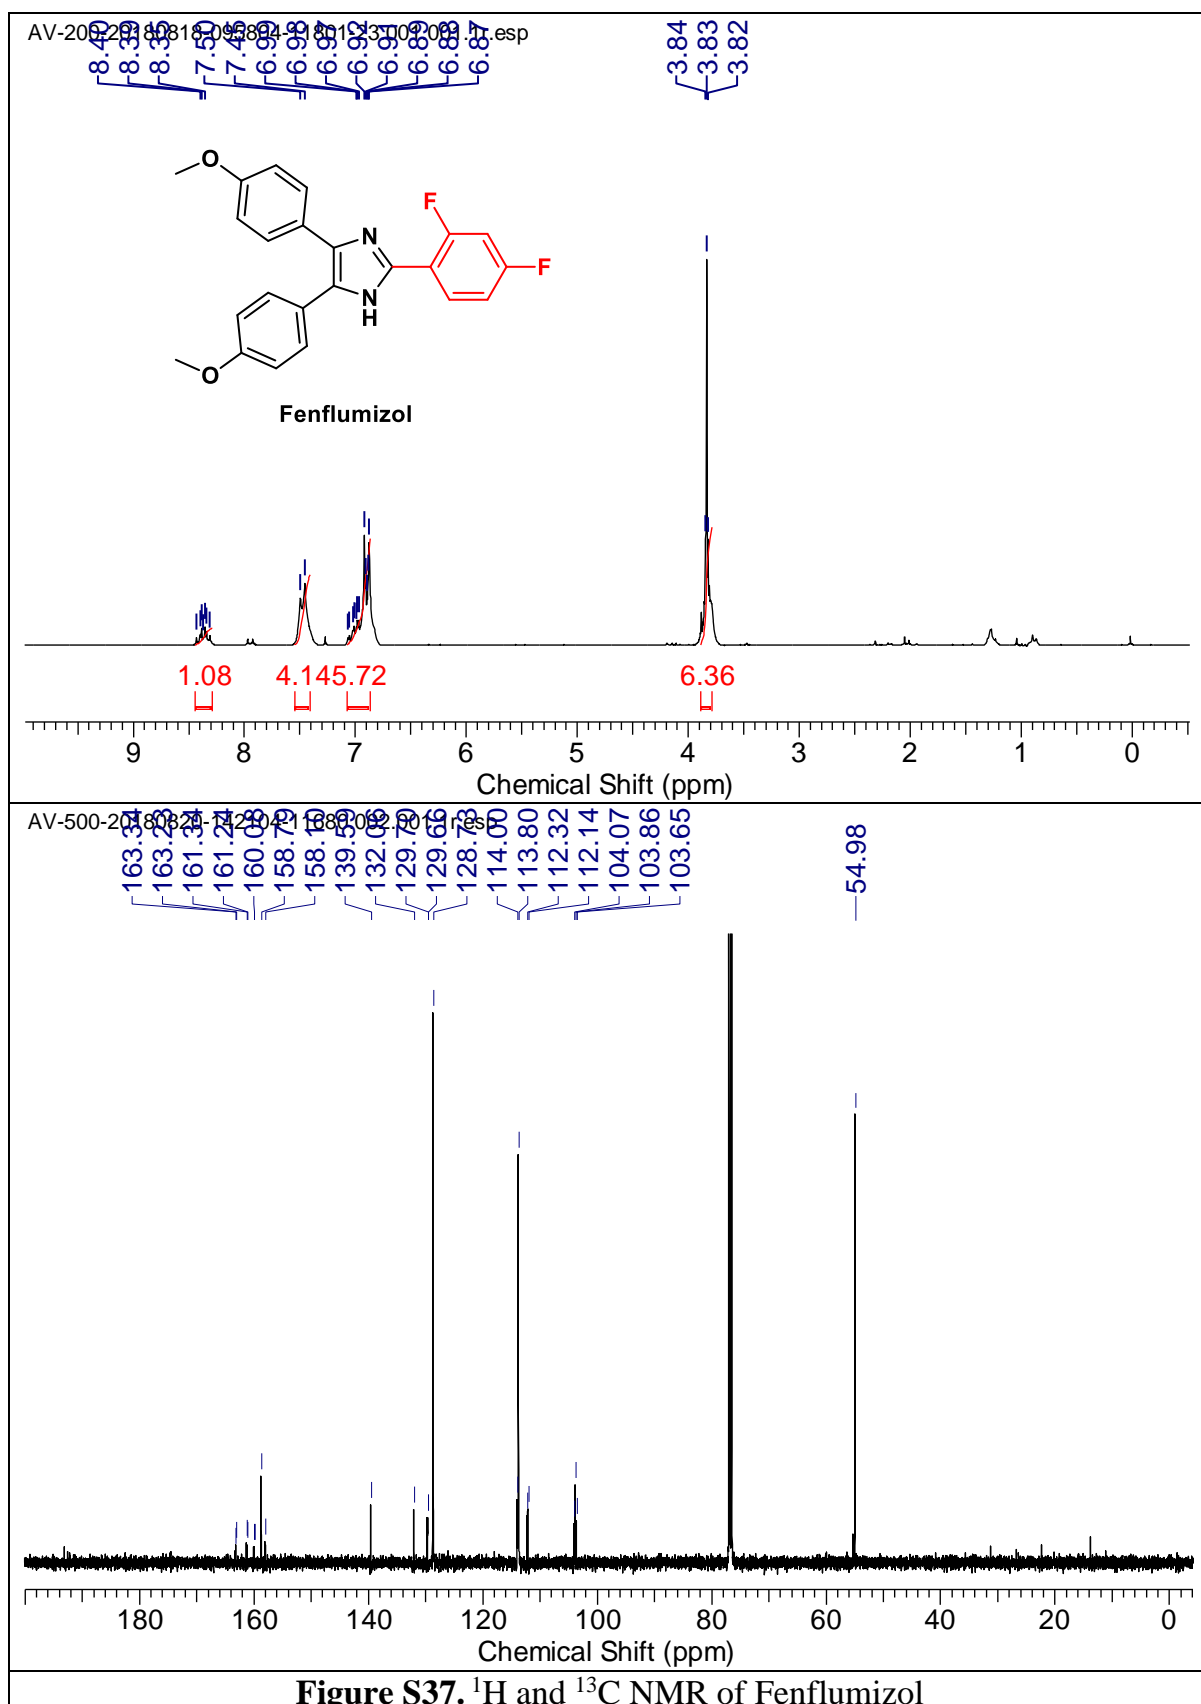

**Table S1. Characterization Data of  $\alpha,\beta$ -Unsaturated Ketones:**

|                                                                                     |                                                                                                                                                                                                                                                                               |
|-------------------------------------------------------------------------------------|-------------------------------------------------------------------------------------------------------------------------------------------------------------------------------------------------------------------------------------------------------------------------------|
| <b>(E)-3-(4-methoxyphenyl)-1-phenylprop-2-en-1-one (1a)<sup>1</sup></b>             |                                                                                                                                                                                                                                                                               |
| 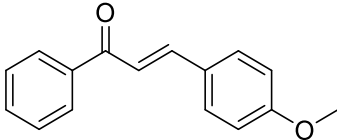   | Yield: 4.5 gm, 91%; yellow solid; <sup>1</sup> H NMR (400 MHz, CDCl <sub>3</sub> ) $\delta$ : 3.91 (s, 3 H), 7.00 (d, $J$ =9.16 Hz, 2 H), 7.39 - 7.50 (m, 3 H), 7.56 (d, $J$ =15.87 Hz, 1 H), 7.62 - 7.76 (m, 2 H), 7.82 (d, $J$ =15.26 Hz, 1 H), 8.06 (d, $J$ =8.55 Hz, 2 H) |
| <b>(E)-3-(4-(methylthio) phenyl)-1-phenylprop-2-en-1-one (1b)<sup>2</sup></b>       |                                                                                                                                                                                                                                                                               |
|    | Yield: 478 mg, 92%; yellow solid; <sup>1</sup> H NMR (200 MHz, CDCl <sub>3</sub> ) $\delta$ : 2.51 (s, 3 H), 7.23 (d, $J$ =8.46 Hz, 2 H), 7.41 - 7.64 (m, 7 H), 7.68 - 7.83 (m, 1 H), 8.00 (dd, $J$ =8.08, 1.52 Hz, 2 H)                                                      |
| <b>(E)-1-phenyl-3-(p-tolyl) prop-2-en-1-one (1c)<sup>2</sup></b>                    |                                                                                                                                                                                                                                                                               |
|  | Yield: 365 mg, 86%; faint yellow solid; <sup>1</sup> H NMR (400 MHz, CDCl <sub>3</sub> ) $\delta$ : 2.41 (s, 3 H), 7.24 (d, $J$ =7.95 Hz, 2 H), 7.47 - 7.54 (m, 3 H), 7.54 - 7.62 (m, 3 H), 7.81 (d, $J$ =15.65 Hz, 1 H), 8.01 - 8.05 (m, 2 H)                                |
| <b>(E)-3-(4-ethylphenyl)-1-phenylprop-2-en-1-one (1d)<sup>3</sup></b>               |                                                                                                                                                                                                                                                                               |
|  | Yield: 298 mg, 85%; yellow solid; <sup>1</sup> H NMR (400 MHz, CDCl <sub>3</sub> ) $\delta$ : 1.23 - 1.29 (m, 3 H), 2.69 (d, $J$ =7.70 Hz, 2 H), 7.23 - 7.27 (m, 2 H), 7.47 - 7.53 (m, 3 H), 7.54 - 7.61 (m, 3 H), 7.81 (d, $J$ =15.65 Hz, 1 H), 7.98 - 8.04 (m, 2 H)         |
| <b>(E)-3-(4-(benzyloxy) phenyl)-1-phenylprop-2-en-1-one (1e)<sup>4</sup></b>        |                                                                                                                                                                                                                                                                               |
|  | Yield: 655 mg, 87%; yellow solid; <sup>1</sup> H NMR (400 MHz, CDCl <sub>3</sub> ) $\delta$ : 5.13 (s, 2 H), 6.97 - 7.06 (m, 2 H), 7.32 - 7.38 (m, 1 H), 7.38 - 7.47 (m, 5 H), 7.47 - 7.55 (m, 2 H), 7.55 - 7.68 (m, 3 H), 7.80 (d, $J$ =15.65 Hz, 1 H), 7.98 - 8.06 (m, 2 H) |
| <b>(E)-1-phenyl-3-(4-(trifluoromethyl) phenyl) prop-2-en-1-one (1f)<sup>3</sup></b> |                                                                                                                                                                                                                                                                               |



|                                                                                     |                                                                                                                                                                                                                                                                                                  |
|-------------------------------------------------------------------------------------|--------------------------------------------------------------------------------------------------------------------------------------------------------------------------------------------------------------------------------------------------------------------------------------------------|
| 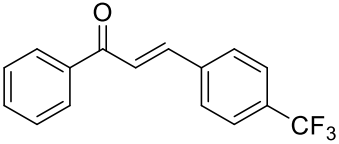   | Yield: 215 mg, 70 %; yellow solid; $^1\text{H}$ NMR (400 MHz, $\text{CDCl}_3$ ) $\delta$ : 7.50 - 7.57 (m, 2 H), 7.58 - 7.64 (m, 2 H), 7.69 (m, $J=8.31$ Hz, 2 H), 7.76 (m, $J=8.31$ Hz, 2 H), 7.82 (d, $J=15.77$ Hz, 1 H), 8.01 - 8.07 (m, 2 H)                                                 |
| <b>(E)-3-(2-methoxyphenyl)-1-phenylprop-2-en-1-one (1g)<sup>5</sup></b>             |                                                                                                                                                                                                                                                                                                  |
|    | Yield: 845 mg, 82%; yellow solid; $^1\text{H}$ NMR (400 MHz, $\text{CDCl}_3$ ) $\delta$ : 3.93 (s, 3 H), 6.93 - 7.04 (m, 2 H), 7.35 - 7.44 (m, 1 H), 7.47 - 7.54 (m, 2 H), 7.54 - 7.62 (m, 2 H), 7.63 - 7.67 (m, 1 H), 8.00 - 8.06 (m, 2 H), 8.13 (d, $J=15.89$ Hz, 1 H)                         |
| <b>(E)-3-(2-chlorophenyl)-1-phenylprop-2-en-1-one (1h)<sup>6</sup></b>              |                                                                                                                                                                                                                                                                                                  |
|   | Yield: 124 mg, 64%; yellow solid; $^1\text{H}$ NMR (400 MHz, $\text{CDCl}_3$ ) $\delta$ : 7.32 - 7.36 (m, 2 H), 7.43 - 7.48 (m, 1 H), 7.48 - 7.51 (m, 1 H), 7.51 - 7.55 (m, 2 H), 7.58 - 7.64 (m, 1 H), 7.74 - 7.80 (m, 1 H), 8.01 - 8.06 (m, 2 H), 8.20 (d, $J=15.57$ Hz, 1 H)                  |
| <b>(E)-1,3-bis(2-methoxyphenyl) prop-2-en-1-one (1i)<sup>6</sup></b>                |                                                                                                                                                                                                                                                                                                  |
|  | Yield: 460 mg, 96%; yellow solid; $^1\text{H}$ NMR (400 MHz, $\text{CDCl}_3$ ) $\delta$ : 3.89 (br. s., 3 H), 3.91 (br. s., 3 H), 6.92-7.02 (m, 4 H), 7.42-7.48 (m, 3 H), 6.62-6.64 (m, 2 H), 7.98 (d, $J=6.11$ Hz, 2 H),                                                                        |
| <b>(2E)-1,3-Diphenylprop-2-en-1-one (1j)<sup>1</sup></b>                            |                                                                                                                                                                                                                                                                                                  |
|  | Yield: 5 gm, 81%; yellow solid; $^1\text{H}$ NMR (200 MHz, $\text{CDCl}_3$ ) $\delta$ : 7.36 - 7.46 (m, 3 H), 7.46 - 7.59 (m, 4 H), 7.59 - 7.67 (m, 2 H), 7.74 - 7.88 (m, 1 H), 7.97 - 8.07 (m, 2 H)                                                                                             |
| <b>(E)-3-(4-methoxyphenyl)-1-(p-tolyl) prop-2-en-1-one (1k)<sup>1</sup></b>         |                                                                                                                                                                                                                                                                                                  |
|  | Yield: 1.5 gm, 96%; yellow solid; $^1\text{H}$ NMR (400 MHz, $\text{CDCl}_3$ ) $\delta$ : 2.44 (s, 3 H), 3.86 (s, 3 H), 6.95 (d, $J=8.80$ Hz, 2 H), 7.31 (m, $J=8.07$ Hz, 2 H), 7.43 (d, $J=15.65$ Hz, 1 H), 7.61 (m, $J=8.80$ Hz, 2 H), 7.79 (d, $J=15.65$ Hz, 1 H), 7.94 (d, $J=8.31$ Hz, 2 H) |

|                                                                                     |                                                                                                                                                                                                                                                                      |
|-------------------------------------------------------------------------------------|----------------------------------------------------------------------------------------------------------------------------------------------------------------------------------------------------------------------------------------------------------------------|
| <b>(E)-3-(4-fluorophenyl)-1-(p-tolyl) prop-2-en-1-one (1l)</b> <sup>7</sup>         |                                                                                                                                                                                                                                                                      |
| 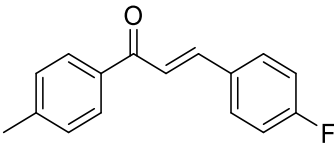   | Yield: 240 mg, 89%; yellow solid; <sup>1</sup> H NMR (400 MHz, CDCl <sub>3</sub> ) δ: 2.45 (br. s., 3 H), 7.04 - 7.16 (m, 2 H), 7.31 (d, J=6.36 Hz, 2 H), 7.47 (d, J=15.65 Hz, 1 H), 7.54 - 7.69 (m, 2 H), 7.78 (d, J=15.65 Hz, 1 H), 7.94 (d, J=8.07 Hz, 2 H)       |
| <b>(E)-1,3-di-p-tolylprop-2-en-1-one (1m)</b> <sup>8</sup>                          |                                                                                                                                                                                                                                                                      |
|    | Yield: 259 mg, 95%; yellow solid; <sup>1</sup> H NMR (400 MHz, CDCl <sub>3</sub> ) δ: 2.40 (s, 3 H), 2.45 (s, 3 H), 7.24 (m, J=7.83 Hz, 2 H), 7.31 (m, J=8.07 Hz, 2 H), 7.53 (s, 1 H), 7.56 (m, J=8.07 Hz, 2 H), 7.80 (d, J=15.65 Hz, 1 H), 7.95 (m, J=8.07 Hz, 2 H) |
| <b>(E)-1-(4-methoxyphenyl)-3-(p-tolyl) prop-2-en-1-one (1n)</b> <sup>1</sup>        |                                                                                                                                                                                                                                                                      |
|   | Yield: 500 mg, 93%; yellow solid; <sup>1</sup> H NMR (400 MHz, CDCl <sub>3</sub> ) δ: 2.40 (s, 3 H), 3.90 (s, 3 H), 6.99 (m, J=8.80 Hz, 2 H), 7.23 (d, J=7.82 Hz, 2 H), 7.48 - 7.59 (m, 3 H), 7.80 (d, J=15.65 Hz, 1 H), 8.05 (m, J=8.80 Hz, 2 H)                    |
| <b>(E)-1-(4-methoxyphenyl)-3-(4-nitrophenyl) prop-2-en-1-one (1o)</b> <sup>9</sup>  |                                                                                                                                                                                                                                                                      |
|  | Yield: 100 mg, 75%; yellow solid; <sup>1</sup> H NMR (400 MHz, CDCl <sub>3</sub> ) δ: 3.92 (s, 3 H), 7.02 (d, J=8.80 Hz, 2 H), 7.58 - 7.73 (m, 1 H), 7.79 (d, J=6.85 Hz, 3 H), 8.06 (d, J=8.80 Hz, 2 H), 8.29 (d, J=8.56 Hz, 2 H)                                    |
| <b>(E)-1-(4-bromophenyl)-3-(4-methoxyphenyl) prop-2-en-1-one (1p)</b> <sup>1</sup>  |                                                                                                                                                                                                                                                                      |
|  | Yield: 400 mg, 88%; yellow solid; <sup>1</sup> H NMR (400 MHz, CDCl <sub>3</sub> ) δ: 3.87 (s, 3 H), 6.95 (m, J=8.80 Hz, 2 H), 7.36 (d, J=15.53 Hz, 1 H), 7.61 (d, J=8.80 Hz, 2 H), 7.65 (d, J=8.56 Hz, 2 H), 7.80 (d, J=15.65 Hz, 1 H), 7.89 (m, J=8.56 Hz, 2 H)    |
| <b>(E)-1,3-bis(4-methoxyphenyl)prop-2-en-1-one (1q)</b> <sup>1</sup>                |                                                                                                                                                                                                                                                                      |
|                                                                                     | Yield: 5 gm, 96%; yellow solid; <sup>1</sup> H NMR (400 MHz, CDCl <sub>3</sub> ) δ: 3.84 (br. s., 3 H),                                                                                                                                                              |

|                                                                                         |                                                                                                                                                                                                                                                                          |
|-----------------------------------------------------------------------------------------|--------------------------------------------------------------------------------------------------------------------------------------------------------------------------------------------------------------------------------------------------------------------------|
| 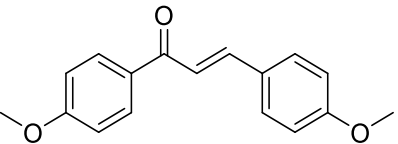       | 3.87 (br. s., 3 H), 6.93 (d, $J=5.99$ Hz, 2 H), 6.97 (d, $J=6.24$ Hz, 2 H), 7.43 (d, $J=15.53$ Hz, 1 H), 7.59 (d, $J=6.11$ Hz, 2 H), 7.77 (d, $J=15.53$ Hz, 1 H), 8.03 (d, $J=7.58$ Hz, 2 H)                                                                             |
| <b>(E)-1-(4-methoxyphenyl)-3-phenylprop-2-en-1-one (1r)<sup>1</sup></b>                 |                                                                                                                                                                                                                                                                          |
|        | Yield: 192 mg, 93%; yellow solid; <sup>1</sup> H NMR (200 MHz, CDCl <sub>3</sub> ) $\delta$ : 3.88 (s, 3 H), 6.99 (d, $J=8.97$ Hz, 2 H), 7.35 - 7.48 (m, 3 H), 7.49 - 7.61 (m, 1 H), 7.61 - 7.69 (m, 2 H), 7.75 - 7.89 (m, 1 H), 8.05 (d, $J=8.84$ Hz, 2 H)              |
| <b>(E)-3-phenyl-1-(p-tolyl)prop-2-en-1-one (1s)<sup>1</sup></b>                         |                                                                                                                                                                                                                                                                          |
|        | Yield: 230 mg, 87%; yellow solid; <sup>1</sup> H NMR (200 MHz, CDCl <sub>3</sub> ) $\delta$ : 2.45 (s, 3 H), 7.32 (d, $J=7.94$ Hz, 2 H), 7.38 - 7.48 (m, 3 H), 7.48 - 7.62 (m, 1 H), 7.66 (dd, $J=6.50, 2.87$ Hz, 2 H), 7.75 - 7.88 (m, 1 H), 7.96 (d, $J=8.16$ Hz, 2 H) |
| <b>(E)-1-(2,4-dimethylphenyl)-3-phenylprop-2-en-1-one (1t)<sup>10</sup></b>             |                                                                                                                                                                                                                                                                          |
|      | Yield: 450 mg, 85%; faint yellow solid; <sup>1</sup> H NMR (200 MHz, CDCl <sub>3</sub> ) $\delta$ : 2.44 (s, 3 H), 3.85 (s, 3 H), 6.92 (m, $J=8.01$ Hz, 2 H), 6.98 - 7.13 (m, 4 H), 7.42 - 7.45 (m, 1 H), 7.53 (m, $J=8.39$ Hz, 2 H), 7.85 (d, $J=8.01$ Hz, 1 H)         |
| <b>(E)-1-(2,4-difluorophenyl)-3-(4-methoxyphenyl) prop-2-en-1-one (1u)<sup>11</sup></b> |                                                                                                                                                                                                                                                                          |
|      | Yield: 240 mg, 68%; yellow solid; <sup>1</sup> H NMR (200 MHz, CDCl <sub>3</sub> ) $\delta$ : 3.88 (s, 3 H), 6.88 - 6.96 (m, 2 H), 6.99 (d, $J=8.70$ Hz, 3 H), 7.18 - 7.32 (m, 1 H), 7.57 (d, $J=8.70$ Hz, 1 H), 7.73 (d, $J=16.03$ Hz, 1 H), 7.78 - 7.88 (m, 3 H)       |
| <b>(E)-3-(benzo[d][1,3]dioxol-5-yl)-1-phenylprop-2-en-1-one (1v)<sup>8</sup></b>        |                                                                                                                                                                                                                                                                          |
|      | Yield: 274 mg, 84%; yellow solid; <sup>1</sup> H NMR (400 MHz, CDCl <sub>3</sub> ) $\delta$ : 6.04 (s, 2 H), 6.86 (d, $J=8.07$ Hz, 1 H), 7.14 (dd, $J=8.07, 1.71$ Hz, 1 H), 7.18 (d, $J=1.71$ Hz, 1 H), 7.38 (d, $J=15.53$ Hz, 1 H), 7.47 - 7.54 (m, 2 H), 7.56          |

|                                                                                         |                                                                                                                                                                                                                                                                                                                                    |
|-----------------------------------------------------------------------------------------|------------------------------------------------------------------------------------------------------------------------------------------------------------------------------------------------------------------------------------------------------------------------------------------------------------------------------------|
|                                                                                         | - 7.62 (m, 1 H), 7.75 (d, $J=15.53$ Hz, 1 H), 7.98 - 8.05 (m, 2 H)                                                                                                                                                                                                                                                                 |
| <b>(E)-3-(4-methoxyphenyl)-1-(naphthalen-1-yl)prop-2-en-1-one (1w)</b> <sup>7</sup>     |                                                                                                                                                                                                                                                                                                                                    |
| 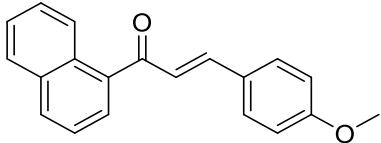       | Yield: 645 mg, 92 %; yellow solid; <sup>1</sup> H NMR (200 MHz, CDCl <sub>3</sub> ) $\delta$ : 3.86 (s, 3 H), 6.89 - 6.96 (m, 2 H), 7.19 (d, $J=16.02$ Hz, 1 H), 7.50 - 7.62 (m, 6 H), 7.75 (dd, $J=7.09$ , 1.22 Hz, 1 H), 7.88 - 7.94 (m, 1 H), 8.00 (d, $J=8.31$ Hz, 1 H), 8.23 - 8.34 (m, 1 H)                                  |
| <b>(E)-1-(3-bromophenyl)-3-(4-methoxyphenyl)prop-2-en-1-one (1x)</b> <sup>12</sup>      |                                                                                                                                                                                                                                                                                                                                    |
|        | Yield: 456 mg, 87 %; yellow solid; <sup>1</sup> H NMR (200 MHz, CDCl <sub>3</sub> ) $\delta$ : 3.89 (s, 3 H), 6.91 - 7.03 (m, 2 H), 7.15 - 7.50 (m, 2 H), 7.60 (d, $J=8.72$ Hz, 1 H), 7.68 - 7.81 (m, 1 H), 7.84 (s, 1 H), 7.88 - 7.94 (m, 1 H), 7.94 - 8.02 (m, 1 H), 8.11 (t, $J=1.58$ Hz, 1 H)                                  |
| <b>(E)-3-(4-methoxyphenyl)-1-(5-methylfuran-2-yl)prop-2-en-1-one (1y)</b> <sup>13</sup> |                                                                                                                                                                                                                                                                                                                                    |
|      | Yield: 500 mg, 90 %; yellow solid; <sup>1</sup> H NMR (400 MHz, CDCl <sub>3</sub> ) $\delta$ : 2.45 (s, 3 H), 3.85 (s, 3 H), 6.19 (d, $J=2.65$ Hz, 1 H), 6.91 (d, $J=8.59$ Hz, 2 H), 7.11 - 7.39 (m, 2 H), 7.59 (d, $J=8.59$ Hz, 2 H), 7.80 (d, $J=15.66$ Hz, 1 H)                                                                 |
| <b>(E)-3-(4-methoxyphenyl)-1-(thiophen-2-yl)prop-2-en-1-one (1z)</b> <sup>14</sup>      |                                                                                                                                                                                                                                                                                                                                    |
|      | Yield: 346 mg, 88%; yellow solid; <sup>1</sup> H NMR (400 MHz, CDCl <sub>3</sub> ) $\delta$ : 3.85 (s, 3 H), 6.90 (s, 1 H), 6.94 (s, 1 H), 7.11 - 7.23 (m, 1 H), 7.23 - 7.39 (m, 1 H), 7.53 - 7.70 (m, 3 H), 7.73 - 7.84 (m, 1 H), 7.85 (s, 1 H)                                                                                   |
| <b>(E)-1,3-di(thiophen-2-yl)prop-2-en-1-one (1za)</b> <sup>9</sup>                      |                                                                                                                                                                                                                                                                                                                                    |
|      | Yield: 300 mg, 80%; yellow solid; <sup>1</sup> H NMR (400 MHz, CDCl <sub>3</sub> ) $\delta$ : 7.12 (dd, $J=5.09$ , 3.66 Hz, 1 H), 7.17 - 7.25 (m, 2 H), 7.27 (d, $J=16.07$ Hz, 1 H), 7.40 (d, $J=3.46$ Hz, 1 H), 7.45 (d, $J=4.88$ Hz, 1 H), 7.68 - 7.73 (m, 1 H), 7.87 (dd, $J=3.66$ , 0.81 Hz, 1 H), 8.00 (d, $J=15.06$ Hz, 1 H) |

|                                                                                     |                                                                                                                                                                                                                                                                                                                                |
|-------------------------------------------------------------------------------------|--------------------------------------------------------------------------------------------------------------------------------------------------------------------------------------------------------------------------------------------------------------------------------------------------------------------------------|
| <b>(E)-4-phenylbut-3-en-2-one (1aa)</b> <sup>15</sup>                               |                                                                                                                                                                                                                                                                                                                                |
| 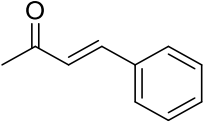   | Yield: 164 mg, 70%; yellow solid; <sup>1</sup> H NMR (400 MHz, CDCl <sub>3</sub> ) δ: 2.39 (s, 3 H), 6.72 (d, J=16.38 Hz, 1 H), 7.40 (td, J=2.35, 1.65 Hz, 3 H), 7.46 - 7.59 (m, 3 H)                                                                                                                                          |
| <b>(E)-1,3-di-p-tolylbut-2-en-1-one (1ma)</b> <sup>17</sup>                         |                                                                                                                                                                                                                                                                                                                                |
|    | Yield: 600 mg, 92%; yellow solid; <sup>1</sup> H NMR (400 MHz, CDCl <sub>3</sub> ) δ: 2.39 (s, 3 H), 2.41 (s, 3 H), 2.57 (s, 3 H), 7.13 - 7.16 (m, 1 H), 7.20 - 7.28 (m, 4 H), 7.47 (d, J=8.19 Hz, 2 H), 7.89 (d, J=8.07 Hz, 2 H)                                                                                              |
| <b>(E)-2-(3-methoxybenzylidene)-1-phenylbutan-1-one (1zb)</b> <sup>16</sup>         |                                                                                                                                                                                                                                                                                                                                |
|   | Yield: 256 mg, 68%; yellow solid; <sup>1</sup> H NMR (400 MHz, CDCl <sub>3</sub> ) δ: 1.21 (t, J=7.44 Hz, 3 H), 2.80 (q, J=7.25 Hz, 2 H), 3.84 (s, 3 H), 6.87 - 6.95 (m, 2 H), 7.00 (d, J=7.25 Hz, 1 H), 7.05 (s, 1 H), 7.34 (t, J=7.63 Hz, 1 H), 7.48 (t, J=6.87 Hz, 2 H), 7.57 (d, J=7.25 Hz, 1 H), 7.81 (d, J=7.63 Hz, 2 H) |
| <b>Methyl (E)-4-(3-oxo-3-(p-tolyl) prop-1-en-1-yl) benzoate (1zc)</b>               |                                                                                                                                                                                                                                                                                                                                |
|  | Yield: 554 mg, 78%; yellow solid; <sup>1</sup> H NMR (200 MHz, CDCl <sub>3</sub> ) δ: 2.46 (s, 3 H), 7.33 (d, J=7.93 Hz, 2 H), 7.58 - 7.74 (m, 2 H), 7.76 - 7.83 (m, 2 H), 7.95 (t, J=8.24 Hz, 4 H), 10.06 (s, 1 H)                                                                                                            |

## References:

- (1) Li, Z.; Zhao, H.; Han, H.; Liu, Y.; Song, J.; Guo, W.; Chu, W.; Sun, Z. Graphene-Supported ZnO Nanoparticles: An Efficient Heterogeneous Catalyst for the Claisen-Schmidt Condensation Reaction without Additional Base. *Tetrahedron Lett.* **2017**, *58*, 3984-3988.
- (2) Umesha, B.; Basavaraju, Y. B. Synthesis and Pharmacological Studies of New Pyrazole Analogues of Podophyllotoxin. *Russian Journal of Bioorganic Chemistry* **2014**, *40*, 467-476.
- (3) Stroba, A.; Schaeffer, F.; Hindie, V.; Lopez-Garcia, L.; Adrian, I.; Frohner, W.; Hartmann, R.W.; Biondi, R. M.; Engel, M. 3,5-Diphenylpent-2-enoic Acids as Allosteric Activators of the Protein Kinase PDK1: Structure-Activity Relationships and Thermodynamic Characterization of Binding as Paradigms for PIF-Binding Pocket-Targeting Compounds. *J. Med. Chem.* **2009**, *52*, 4683-4693.

- (4) Iftikhar, S.; Khan, S.; Bilal, A.; Manzoor, S.; Abdullah, M.; Emwas, A.; Sioud, S.; Gao, X.; Chotana, G. A.; Faisal, A.; Saleem, R. S. Z. Synthesis and Evaluation of Modified Chalcone Based p53 Stabilizing Agents. *Bioorganic & Medicinal Chemistry Lett.* **2017**, *27*, 4101-4106. (5) Li, L.; Stimac, J. C.; Geary, L. M. Synthesis of Olefins via a Wittig Reaction Mediated by Triphenylarsine. *Tetrahedron Lett.* **2017**, *58*, 1379-1381.
- (6) Kazi, I.; Guha, S.; Sekar, G. CBr<sub>4</sub> as a Halogen Bond Donor Catalyst for the Selective Activation of Benzaldehydes to Synthesize  $\alpha,\beta$ -Unsaturated Ketones. *Org. Lett.* **2017**, *19*, 1244-1247.
- (7) Tripathi, S.; Kapoor, R.; Yadav, L. D. S. Visible Light Activated Radical Denitrative Benzoylation of *p*-Nitrostyrenes: A Photocatalytic Approach to Chalcones. *Adv. Synth. Catal.* **2018**, *360*, 1407-1413.
- (8) Chan, C.; Tsai, Y.; Chang, M. Bi(OTf)<sub>3</sub> Catalyzed Disproportionation Reaction of Cinnamyl Alcohols. *Tetrahedron* **2017**, *73*, 3368-3376.
- (9) Rocchi, D.; González, J. F.; Menéndez, J. C. Montmorillonite Clay-Promoted, Solvent-Free Cross-Aldol Condensations under Focused Microwave Irradiation. *Molecules* **2014**, *19*, 7317-7326.
- (10) Wu, Y.; Zhou, G.; Meng, Q.; Tang, X.; Liu, G.; Yin, H.; Zhao, J.; Yang, F.; Yu, Z.; Luo, Y. Visible Light-Induced Aerobic Epoxidation of  $\alpha,\beta$ -Unsaturated Ketones Mediated by Amidines. *J. Org. Chem.* **2018**, *83*, 13051-13062.
- (11) Kadnor, V. A.; Pandhare, G. R.; Gadhave, A.G.; Uphade, B. K. Synthesis and Antibacterial Activity of some Fluorinated Isooxazoline Derivatives. *RASAYAN J. Chem* **2011**, *4*, 437-441.
- (12) Zuo, Y.; Yu, Y.; Wang, S.; Shao, W.; Zhou, B.; Lin, L.; Luo, Z.; Huang, R.; Du, J.; Bu, X. Synthesis and Cytotoxicity Evaluation of Biaryl-based Chalcones and their Potential in TNF $\alpha$ -Induced Nuclear Factor- $\kappa$ B Activation Inhibition. *European Journal of Medicinal Chemistry* **2012**, *50*, 393-404.
- (13) Liu, W.; Shi, H.; Jin, H.; Zhao, H.; Zhou, G.; Wen, F.; Yu, Z.; Hou T. Design, Synthesis and Antifungal Activity of a Series of Novel Analogs Based on Diphenyl Ketones. *Chem Biol Drug Des* **2009**, *73*, 661-667.
- (14) Smith, N. M.; Soh, P.; Asokanathan, N.; Norret, M.; Stewart, G. A.; Raston C. L. Immunomodulatory Effects of Functionalized Chalcones on Pro-inflammatory Cytokine Release from Lung Epithelial Cells. *New J. Chem.*, **2009**, *33*, 1869-1873.
- (15) Deck, L. M.; Hunsaker, L. A.; Vander Jagt, T. A.; Whalen, L. J.; Royer R. E.; Vander Jagt, D. L. Activation of Anti-Oxidant Nrf2 Signaling by Enone Analogues of Curcumin. *European Journal of Medicinal Chemistry* **2018**, *143*, 854-865.
- (16) Endo, K.; Hamada, D.; Yakeishi, S.; Shibata, T. Effect of Multinuclear Copper/Aluminum Complexes in Highly Asymmetric Conjugate Addition of Trimethylaluminum to Acyclic Enones. *Angew. Chem. Int. Ed.* **2013**, *52*, 606-610.
- (17) Sharma, L.; Kimb, K. B.; Elliott, G. I. A Selective Solvent-Free Self-Condensation of Carbonyl Compounds Utilizing Microwave Irradiation. *Green Chem.*, **2011**, *13*, 1546-1549.
- (18) Hu, Z.; Liu, J.; Li, G.; Dong, Z.; Li, W. Synthesis of Asymmetric Triaryl benzenes by Using SOCl<sub>2</sub>-C<sub>2</sub>H<sub>5</sub>OH Reagent. *Journal of the Chinese Chemical Society* **2004**, *51*, 581-583.



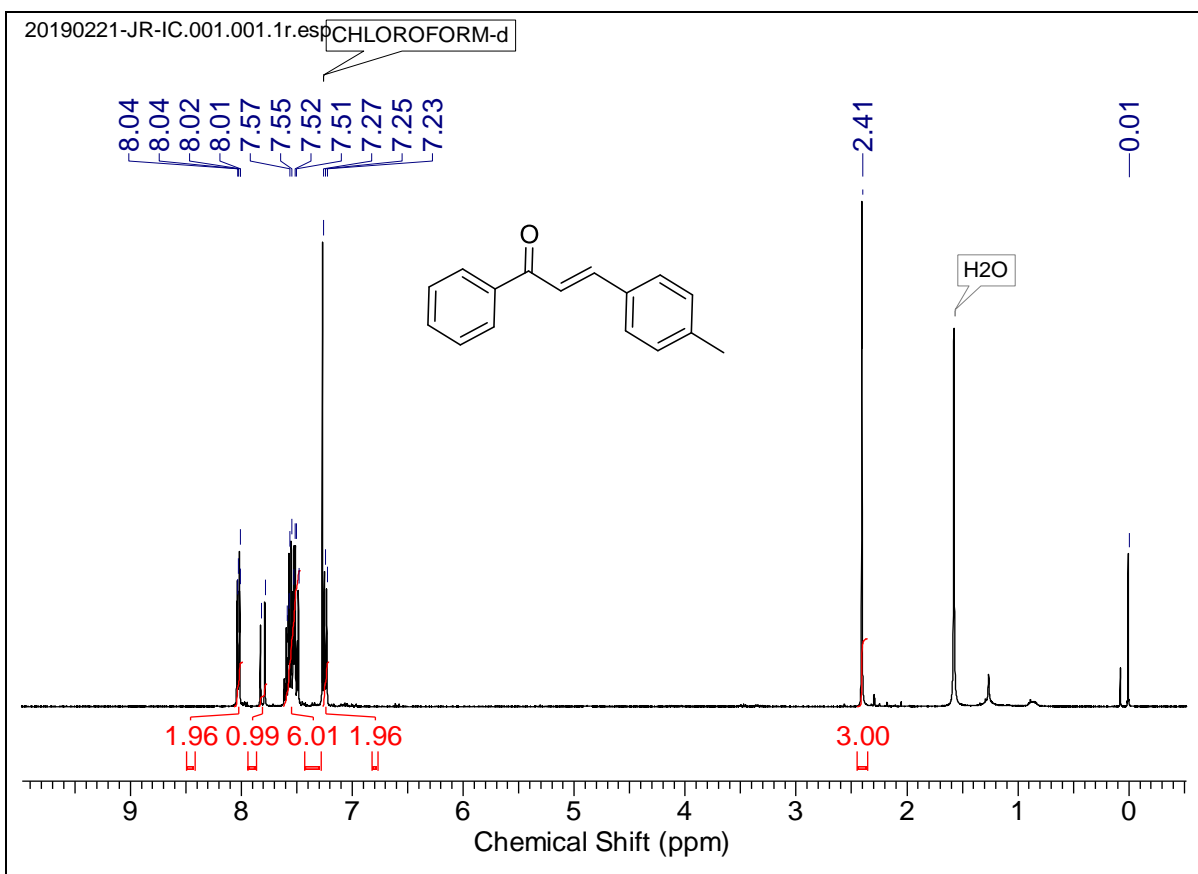

**Figure S40.**  $^1\text{H}$  NMR of (E)-1-phenyl-3-(p-tolyl) prop-2-en-1-one (**1c**)

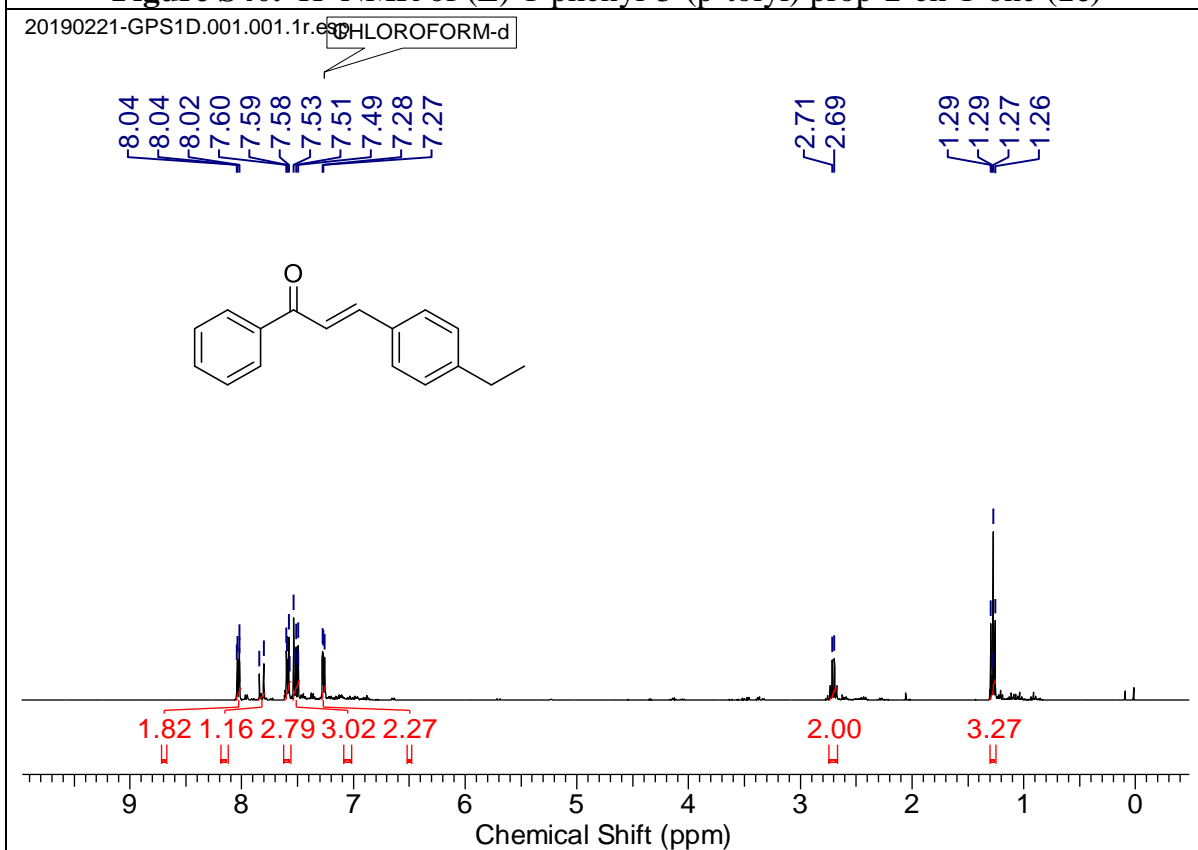

**Figure S41.**  $^1\text{H}$  NMR of (E)-3-(4-ethylphenyl)-1-phenylprop-2-en-1-one (**1d**)



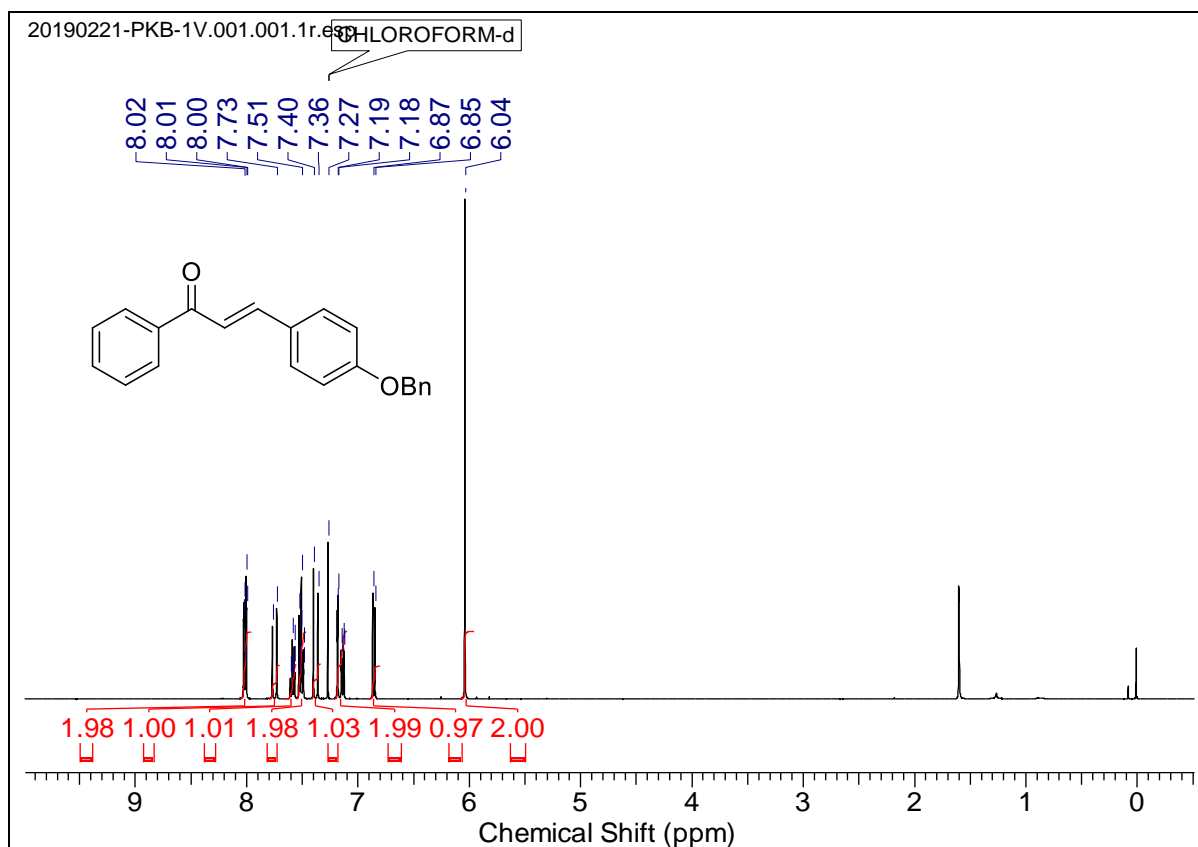

**Figure S42.**  $^1\text{H}$  NMR of (E)-3-(4-(benzyloxy) phenyl)-1-phenylprop-2-en-1-one (**1e**)

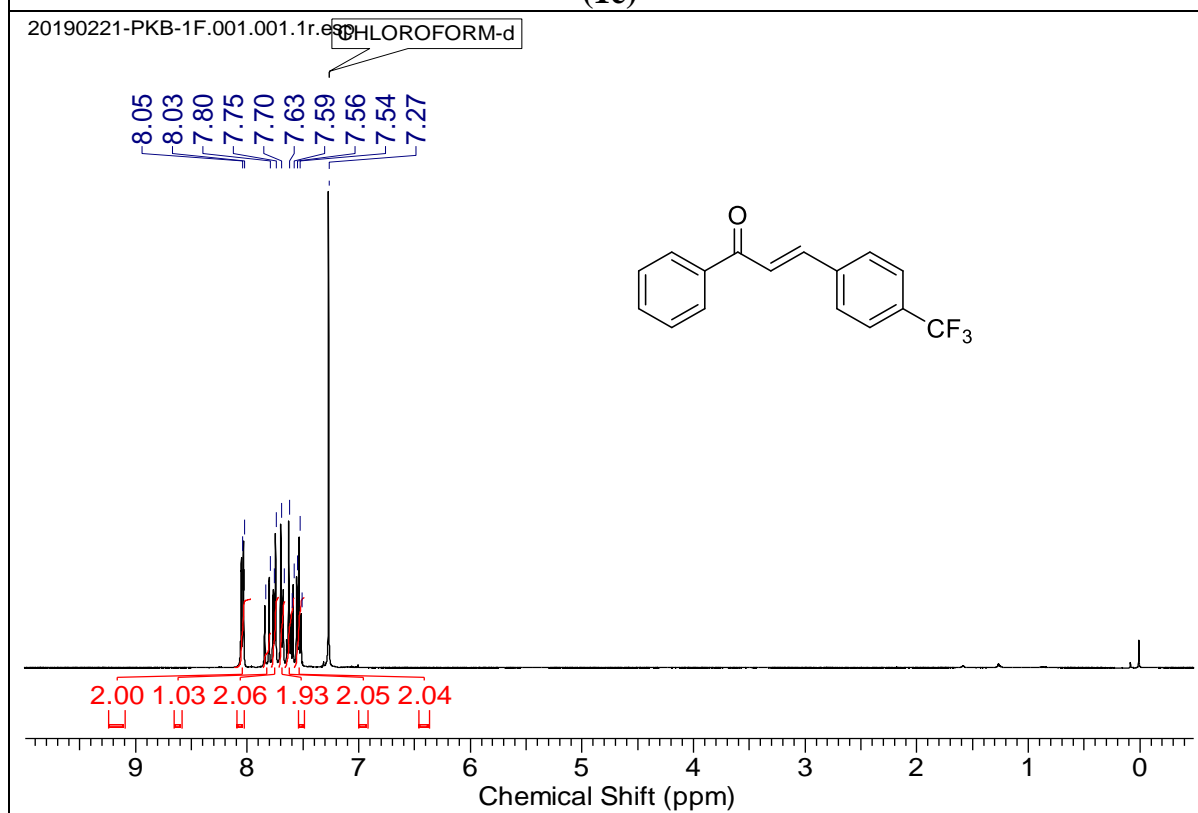

**Figure S43.**  $^1\text{H}$  NMR of (E)-1-phenyl-3-(4-(trifluoromethyl) phenyl) prop-2-en-1-one (**1f**)

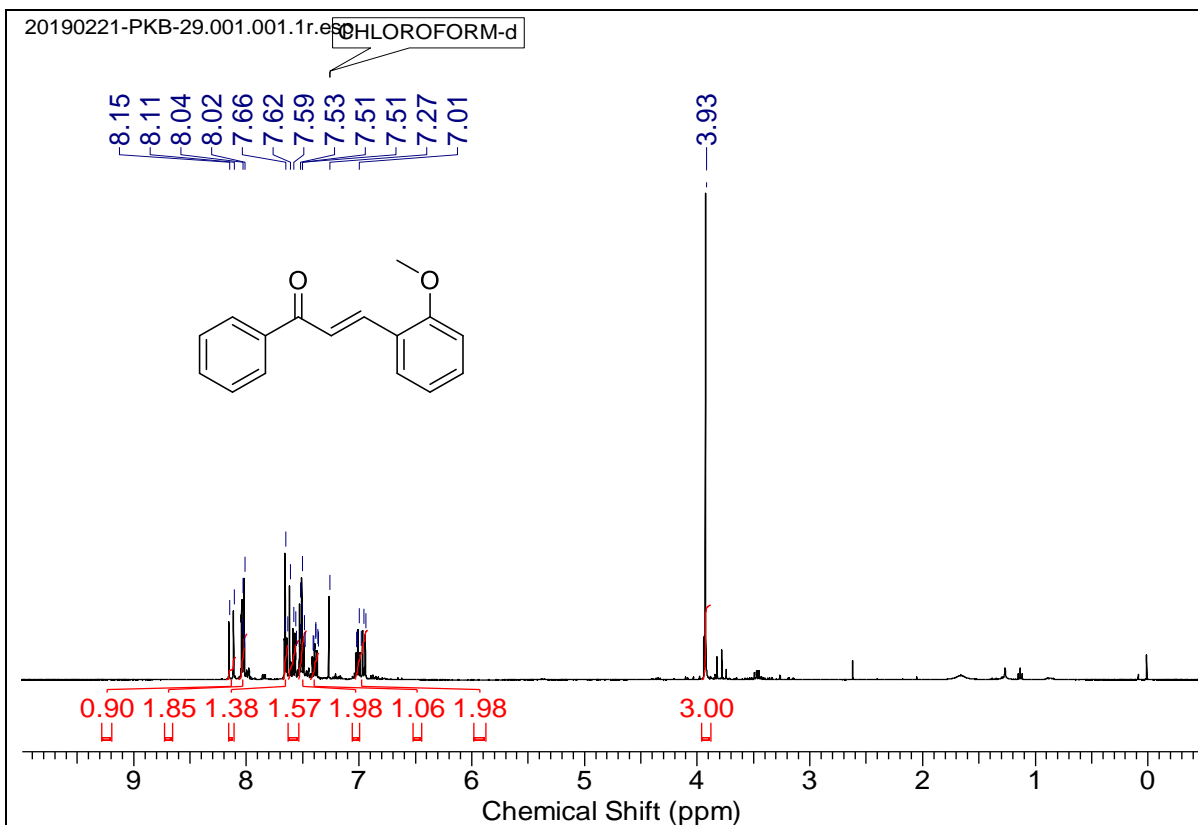

**Figure S44.**  $^1\text{H}$  NMR of (E)-3-(2-methoxyphenyl)-1-phenylprop-2-en-1-one (**1g**)

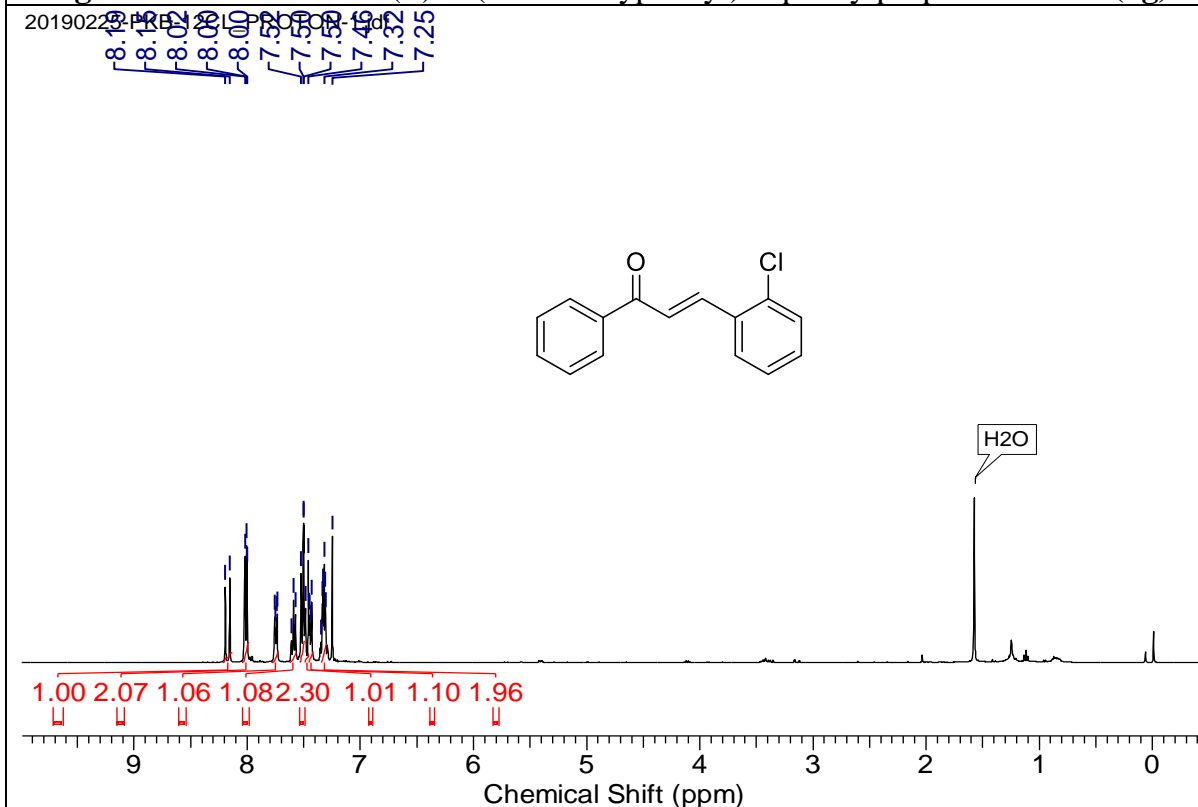

**Figure S45.**  $^1\text{H}$  NMR of (E)-3-(2-chlorophenyl)-1-phenylprop-2-en-1-one (**1h**)

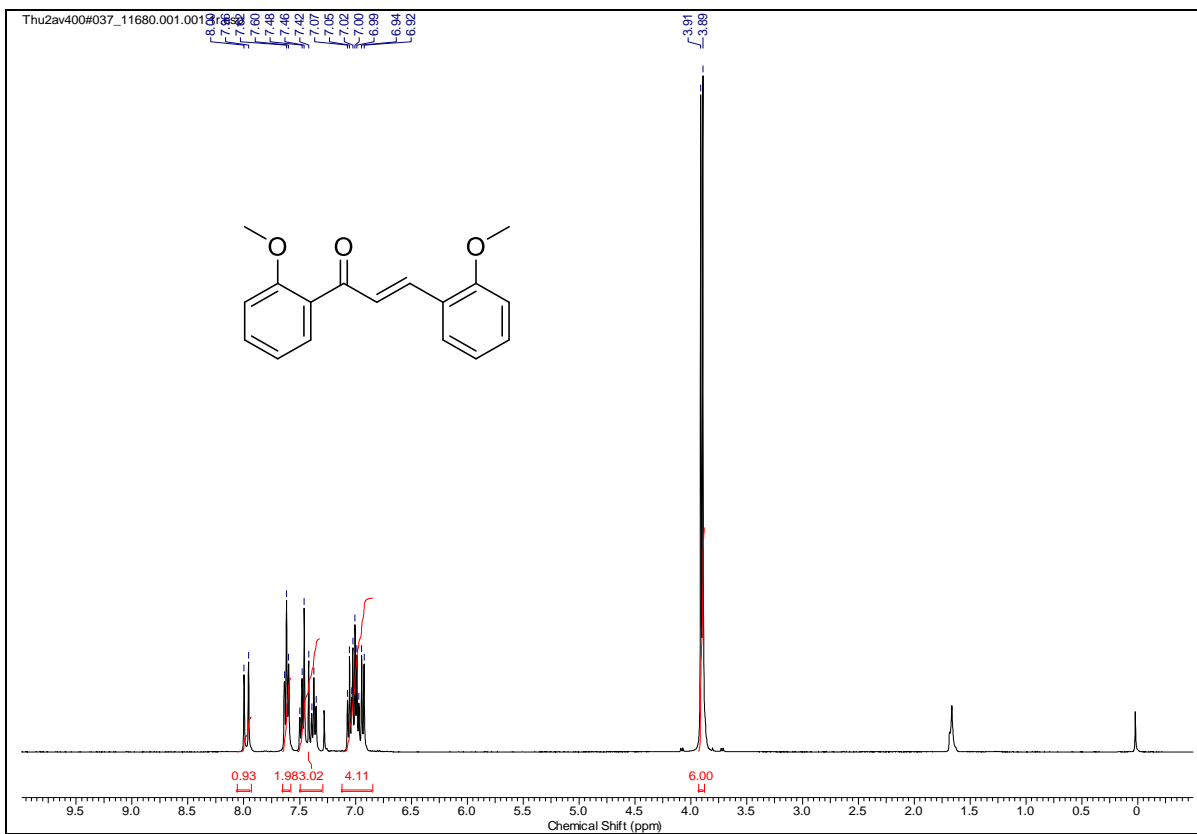

**Figure S46.**  $^1\text{H}$  NMR of (E)-1,3-bis(2-methoxyphenyl) prop-2-en-1-one (**1i**)

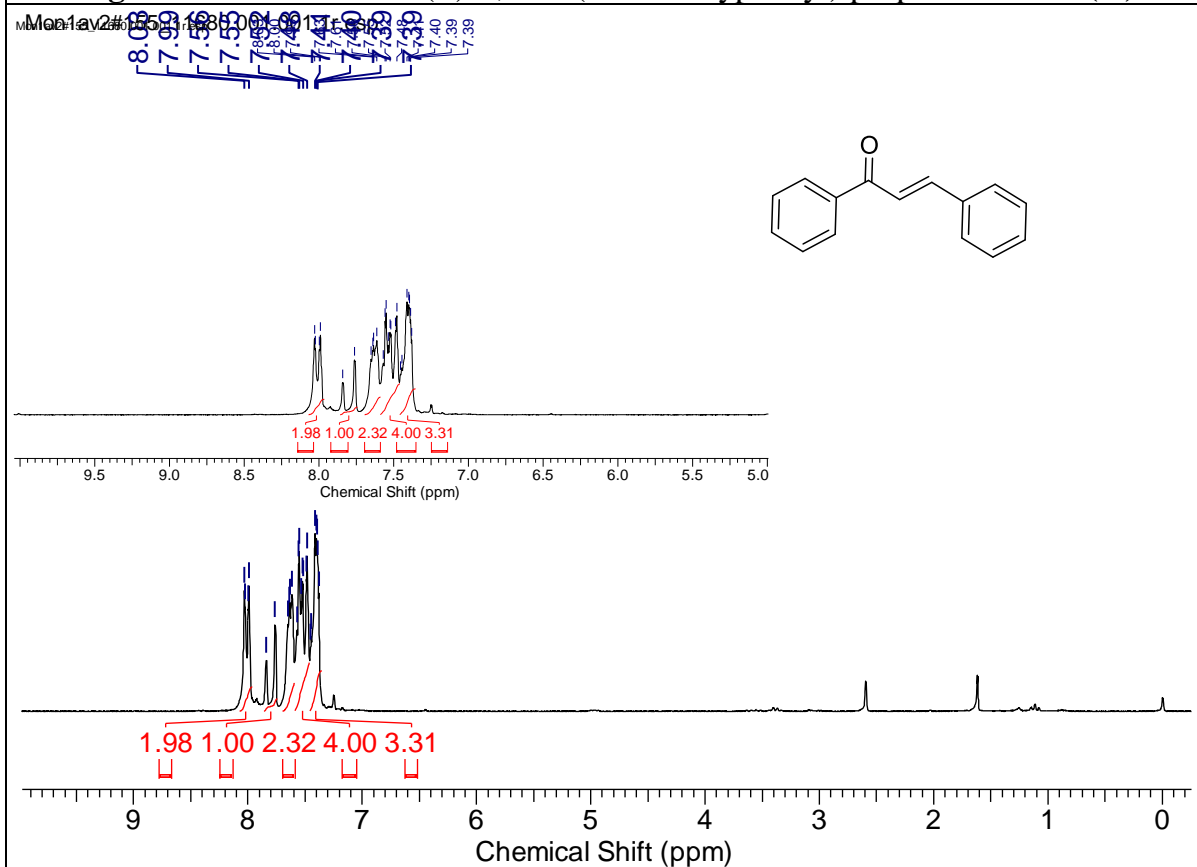

**Figure S47.**  $^1\text{H}$  NMR of (2E)-1,3-Diphenylprop-2-en-1-one (**1j**)

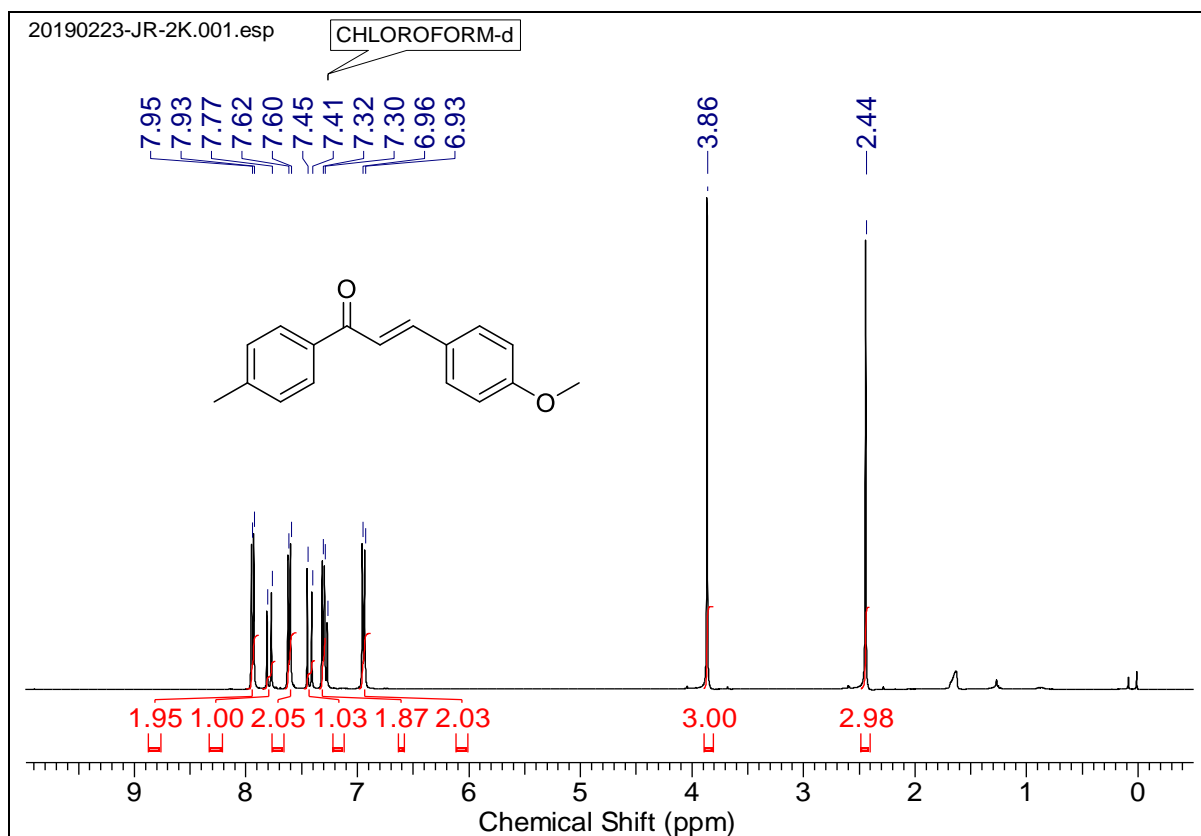

**Figure S48.**  $^1\text{H}$  NMR of (E)-3-(4-methoxyphenyl)-1-(p-tolyl) prop-2-en-1-one (**1k**)

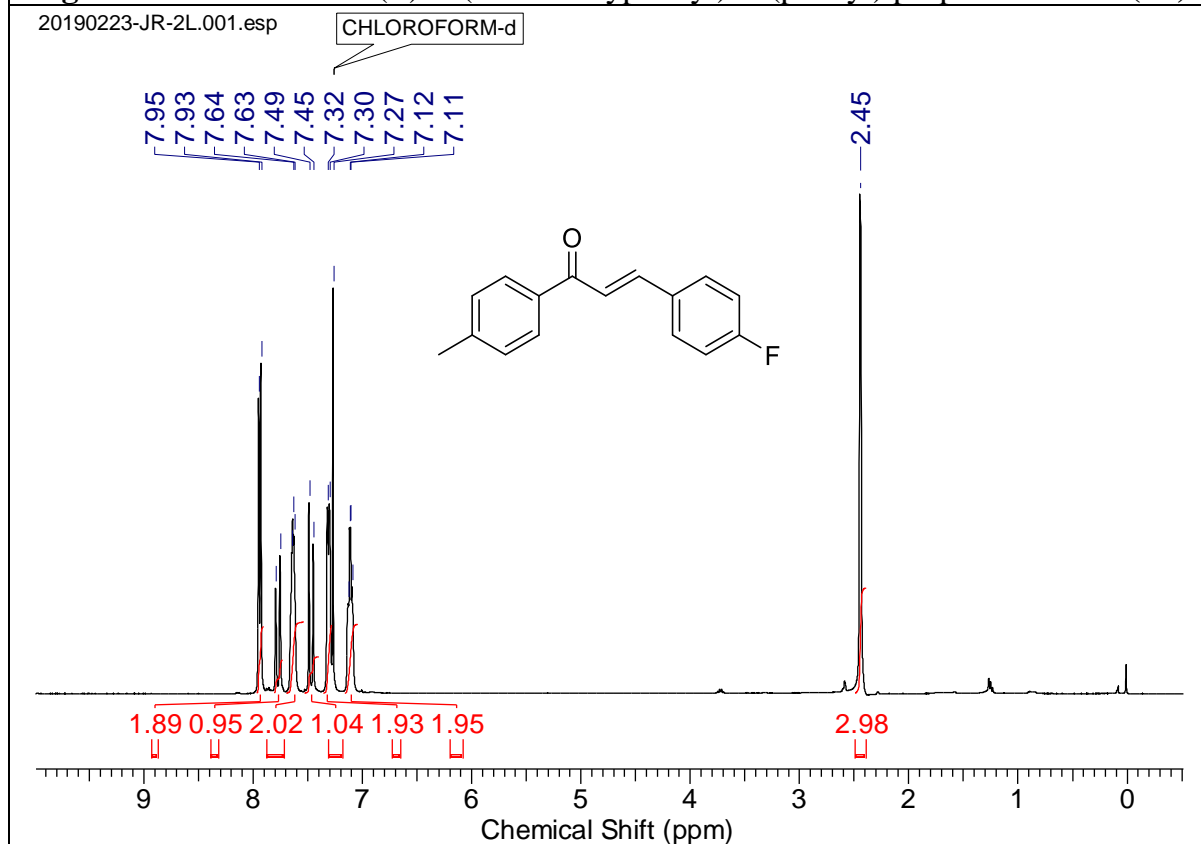

**Figure S49.**  $^1\text{H}$  NMR of (E)-3-(4-fluorophenyl)-1-(p-tolyl) prop-2-en-1-one (**1l**)

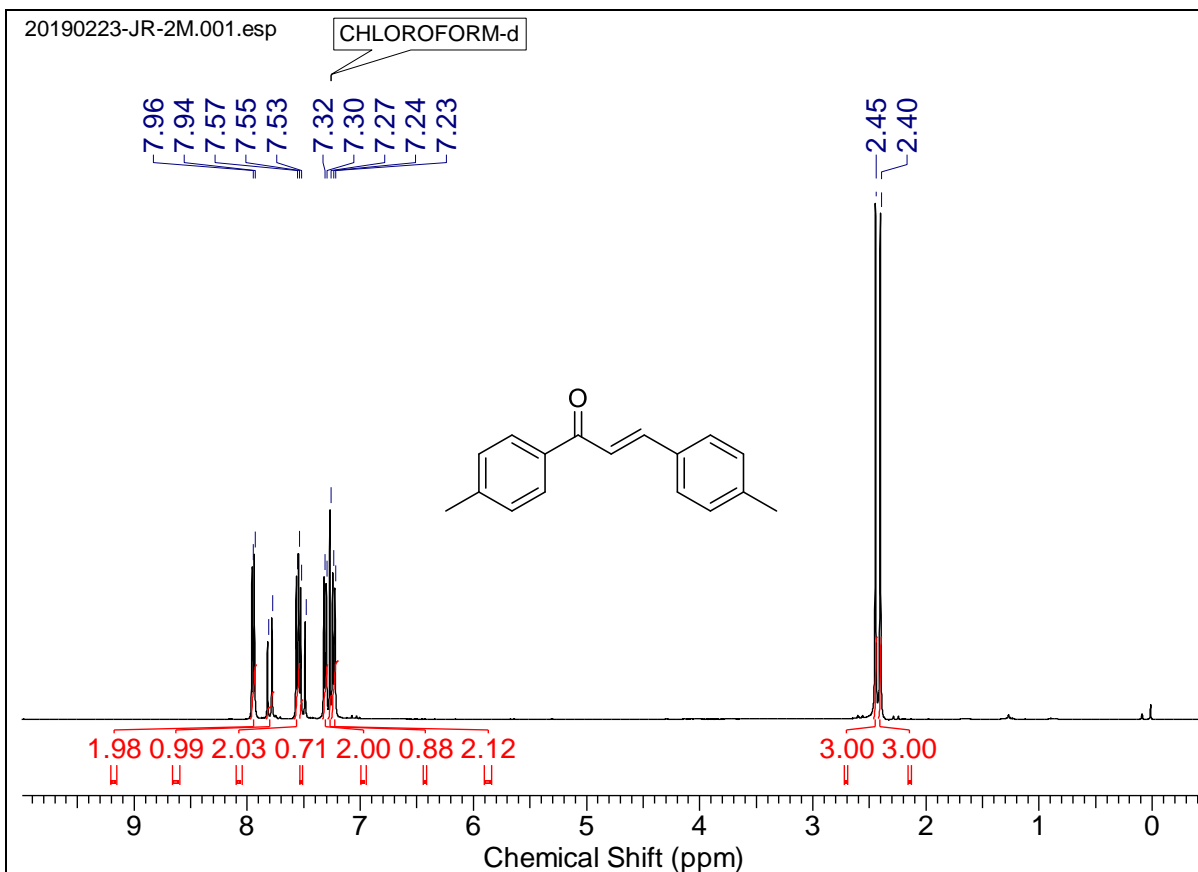

**Figure S50.**  $^1\text{H}$  NMR of (E)-1,3-di-p-tolylprop-2-en-1-one (**1m**)

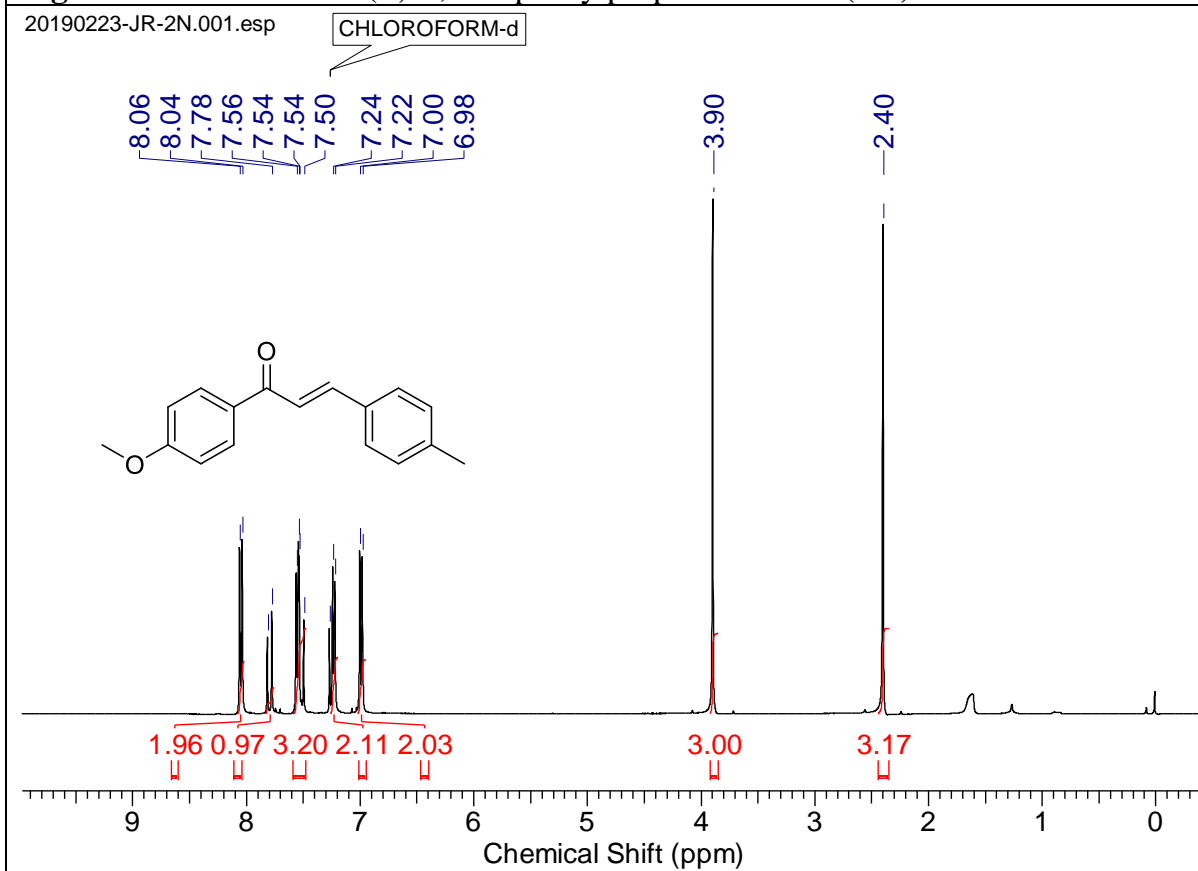

**Figure S51.**  $^1\text{H}$  NMR of (E)-1-(4-methoxyphenyl)-3-(p-tolyl) prop-2-en-1-one (**1n**)

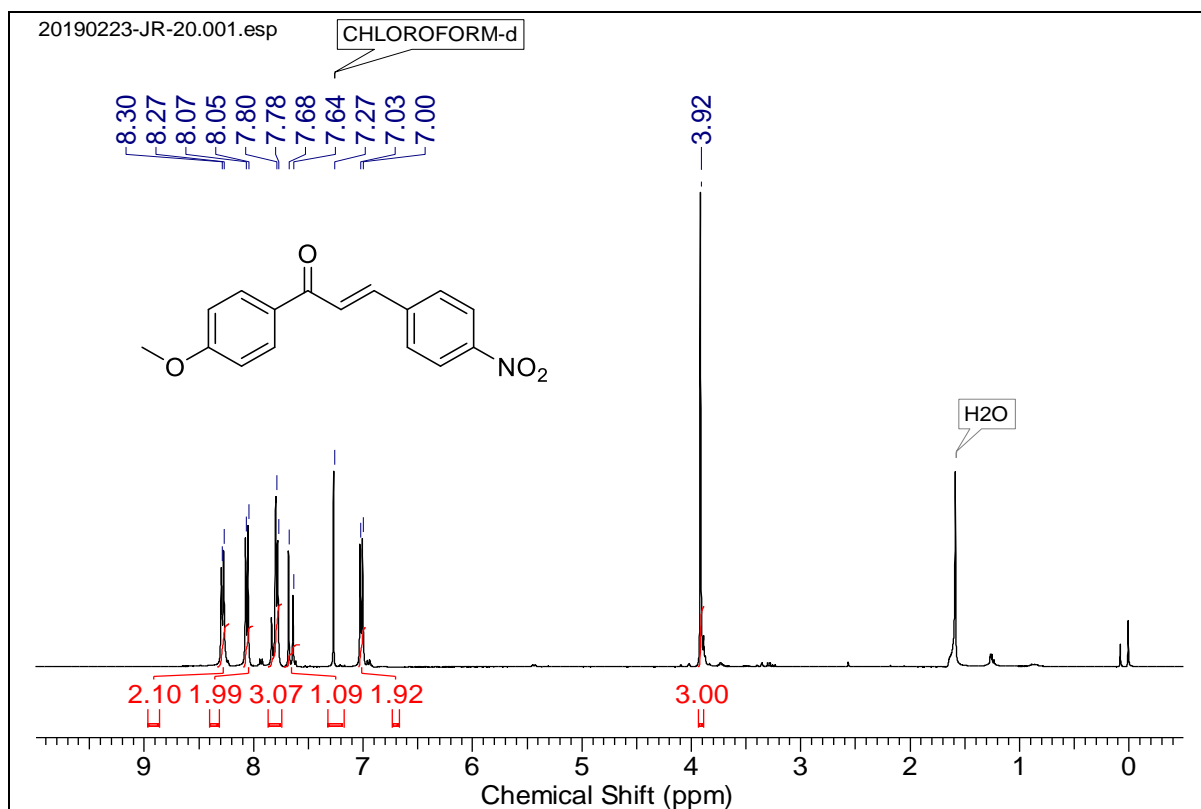

**Figure S52.**  $^1\text{H}$  and  $^{13}\text{C}$  NMR of (E)-1-(4-methoxyphenyl)-3-(4-nitrophenyl) prop-2-en-1-one (**10**)

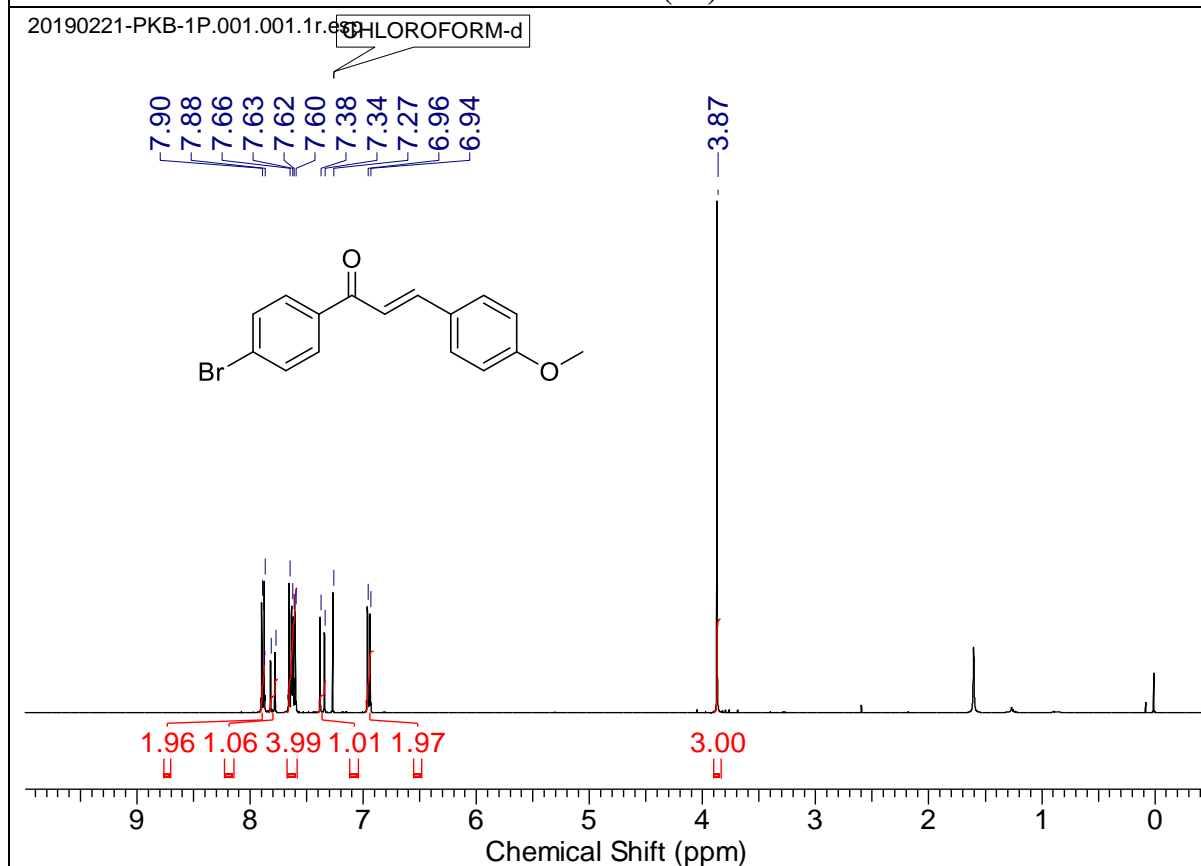

**Figure S53.**  $^1\text{H}$  NMR of (E)-1-(4-bromophenyl)-3-(4-methoxyphenyl) prop-2-en-1-one (**1p**)

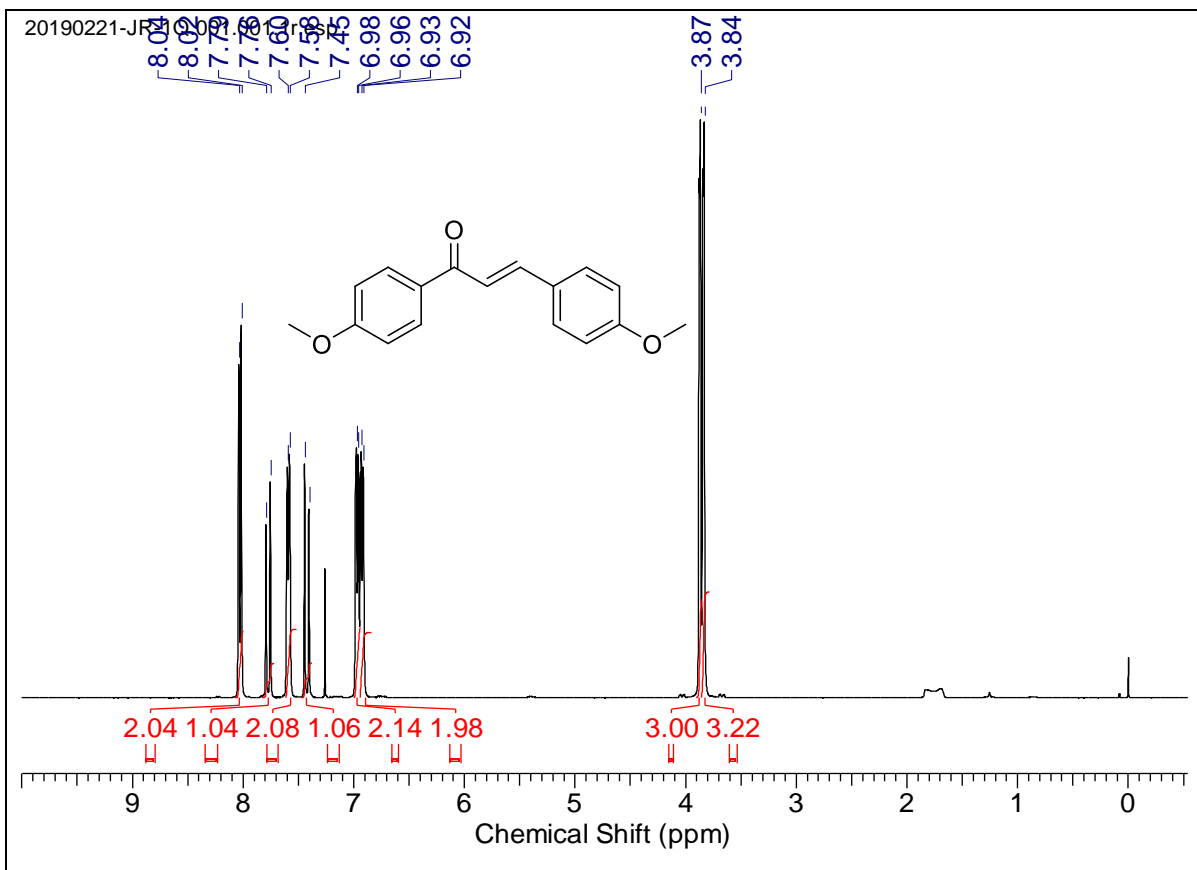

**Figure S54.**  $^1\text{H}$  NMR of (E)-1,3-bis(4-methoxyphenyl)prop-2-en-1-one (**1q**)

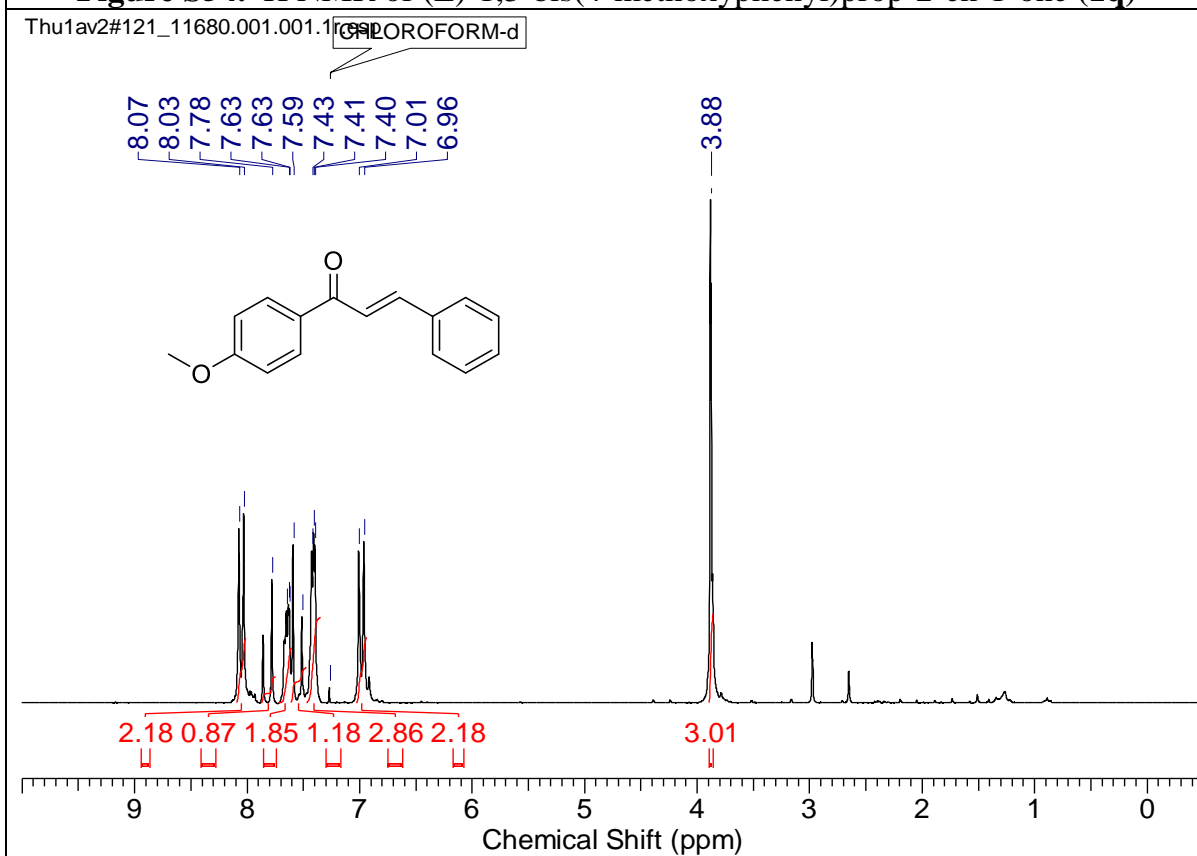

**Figure S55.**  $^1\text{H}$  NMR of (E)-1-(4-methoxyphenyl)-3-phenylprop-2-en-1-one (**1r**)

AV-200-20190221-083954-11680-CHLOROFORM-d

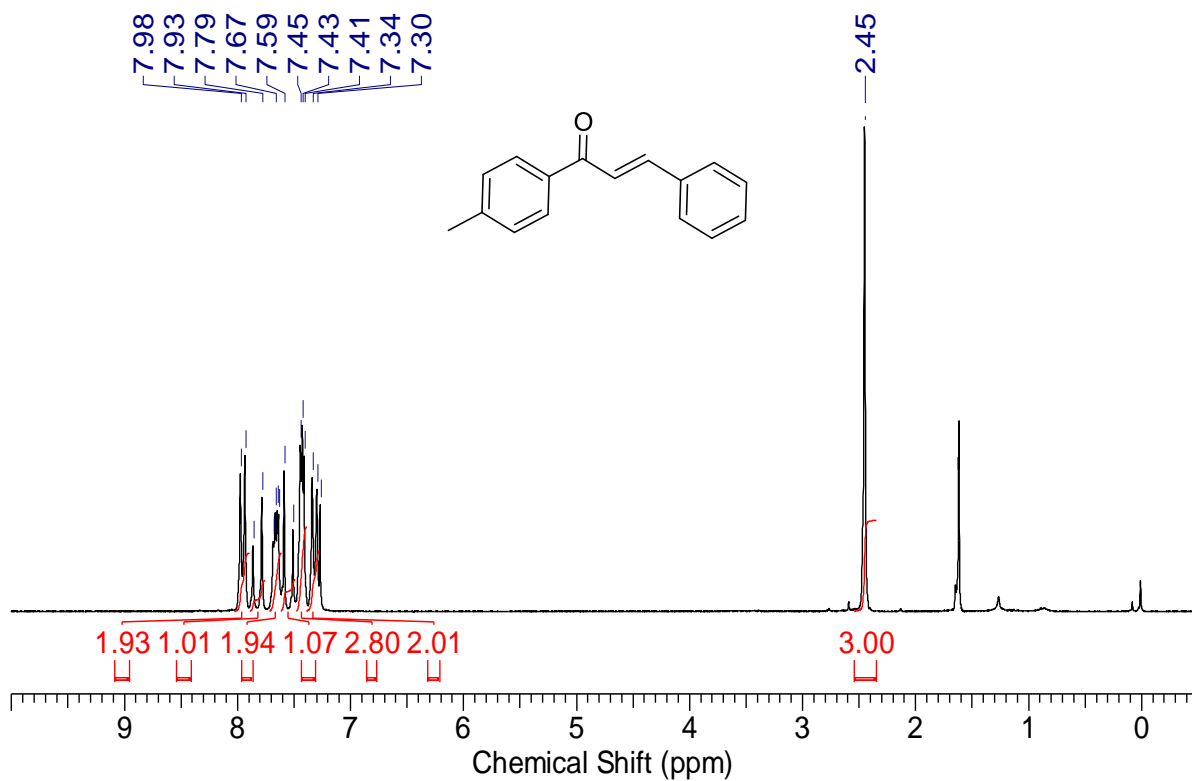

**Figure S56.** <sup>1</sup>H NMR of (E)-3-phenyl-1-(p-tolyl)prop-2-en-1-one (**1s**)

AV-500-20190225-173400-11680-CHLOROFORM-d

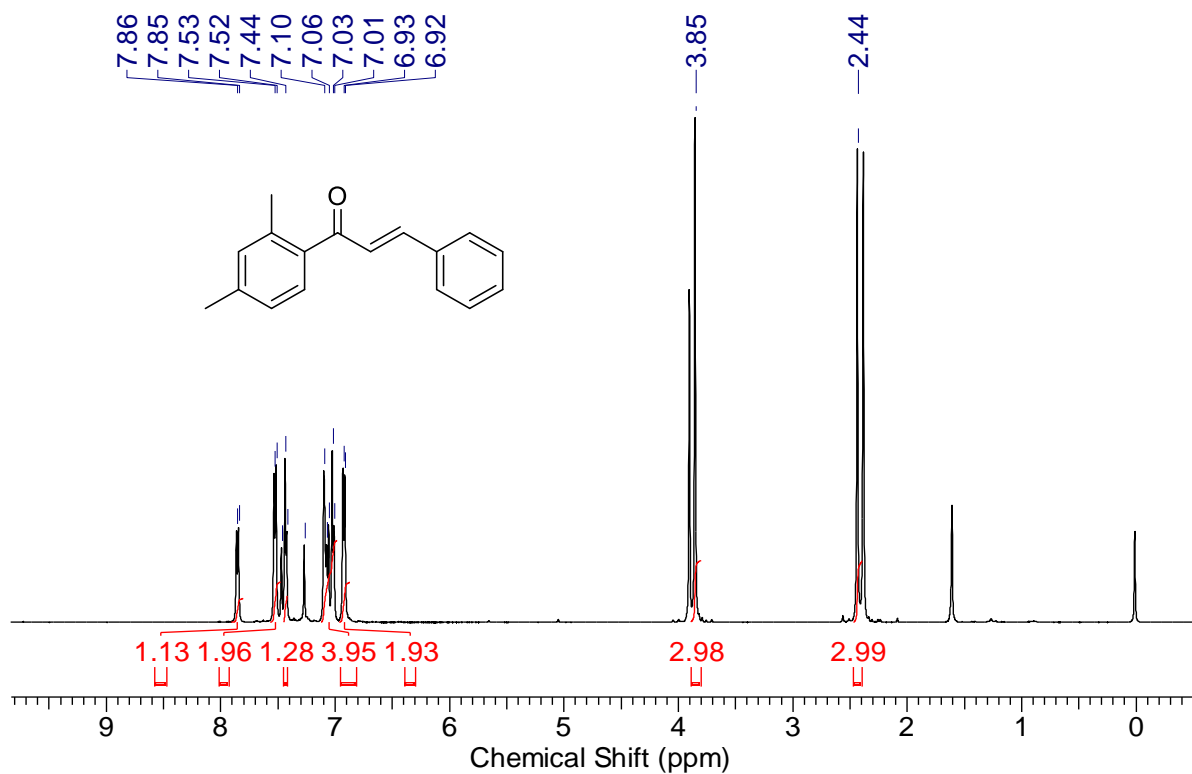

**Figure S57.** <sup>1</sup>H NMR of (E)-1-(2,4-dimethylphenyl)-3-phenylprop-2-en-1-one (**1t**)



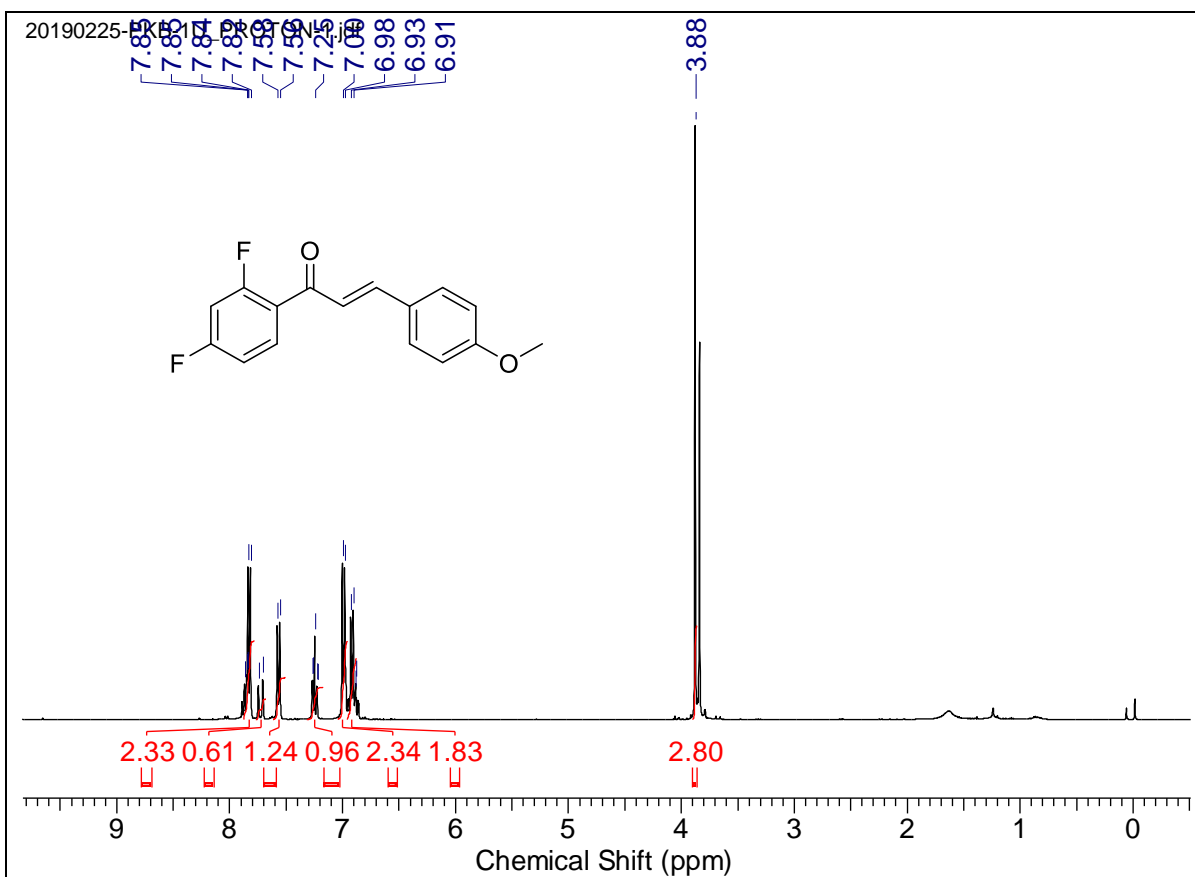

**Figure S58.**  $^1\text{H}$  NMR of (E)-1-(2,4-difluorophenyl)-3-(4-methoxyphenyl)prop-2-en-1-one (**1u**)

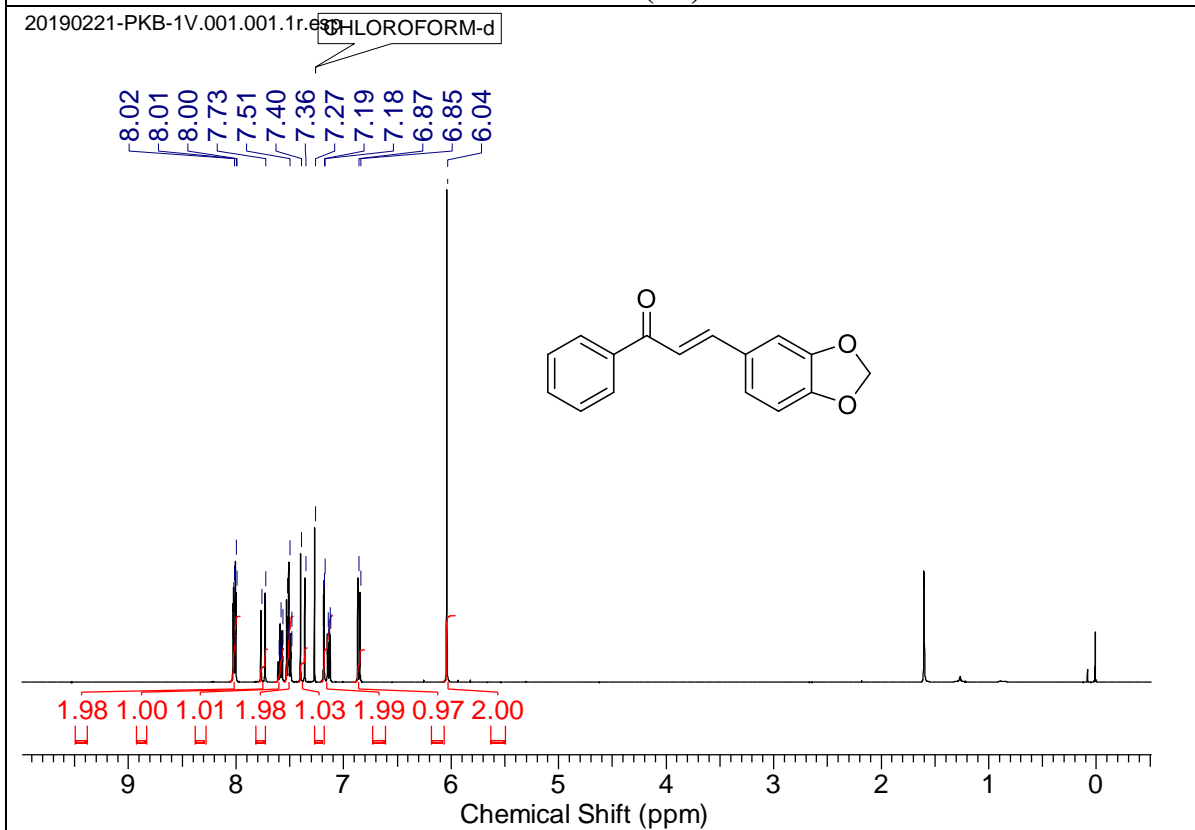

**Figure S59.**  $^1\text{H}$  NMR of (E)-3-(benzo[d][1,3]dioxol-5-yl)-1-phenylprop-2-en-1-one (**1v**)

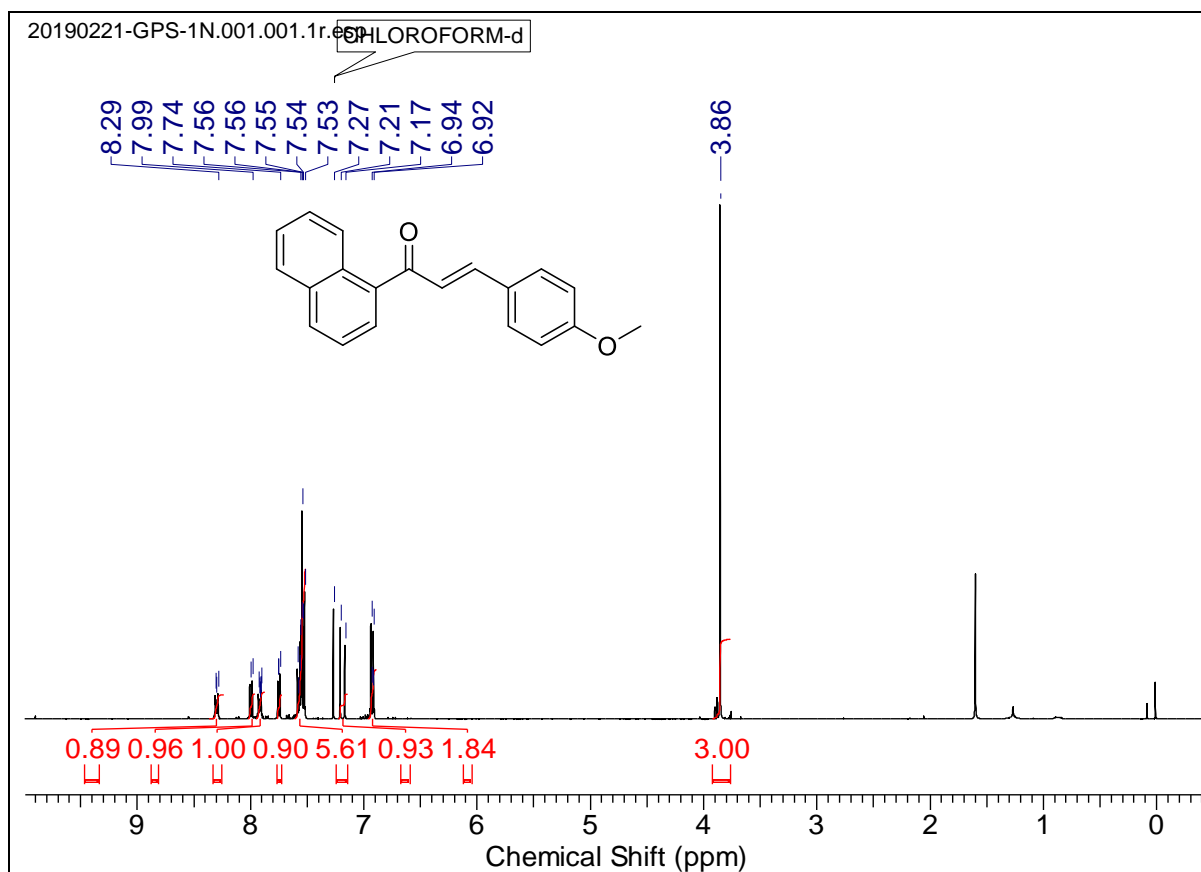

**Figure S60.**  $^1\text{H}$  NMR of (E)-3-(4-methoxyphenyl)-1-(naphthalen-1-yl)prop-2-en-1-one (**1w**)

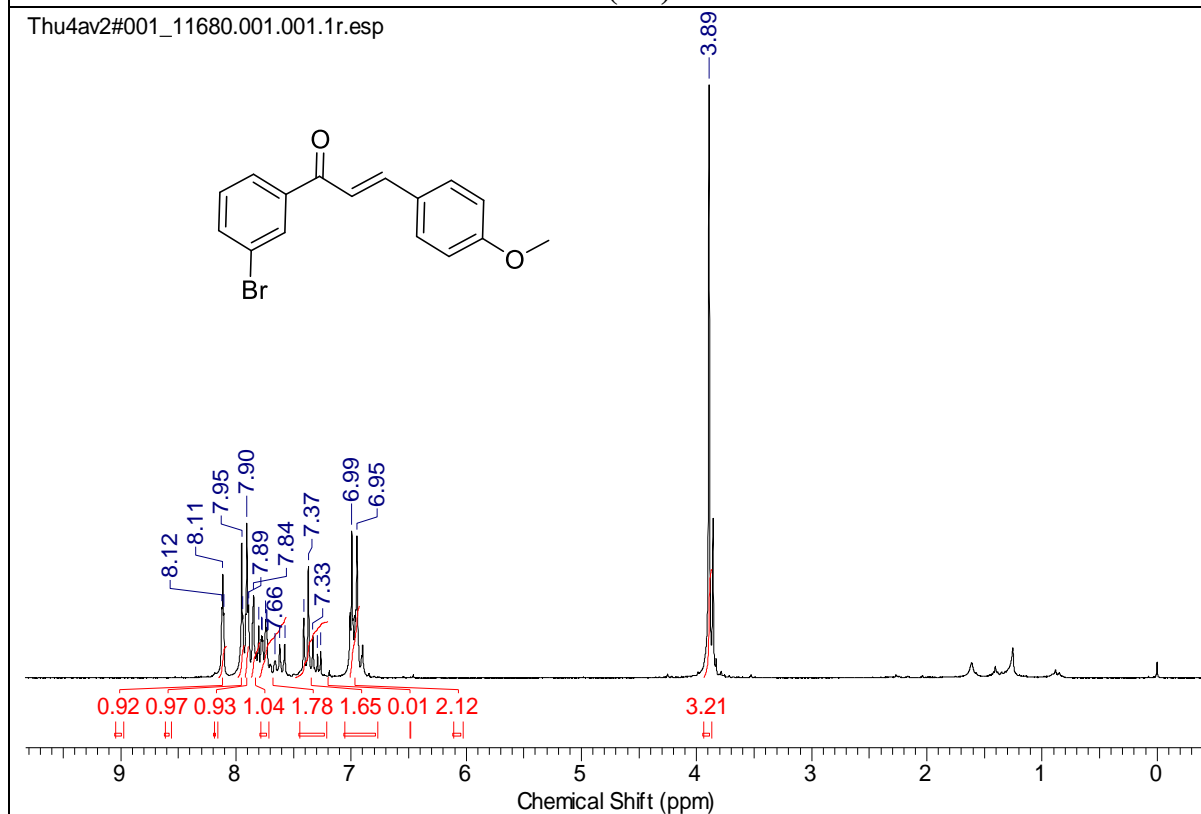

**Figure S61.**  $^1\text{H}$  NMR of (E)-1-(3-bromophenyl)-3-(4-methoxyphenyl)prop-2-en-1-one (**1x**)

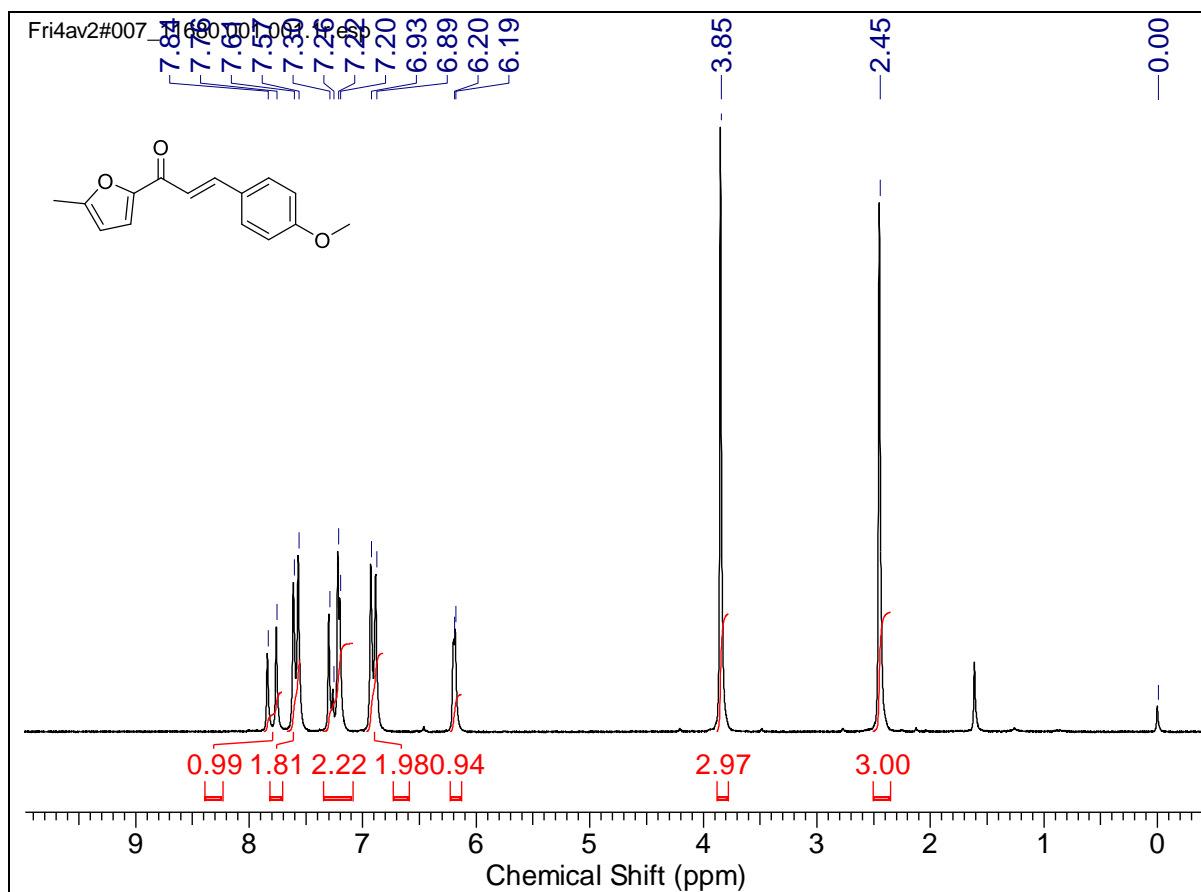

**Figure S62.**  $^1\text{H}$  NMR of (E)-3-(4-methoxyphenyl)-1-(5-methylfuran-2-yl)prop-2-en-1-one (**1y**)

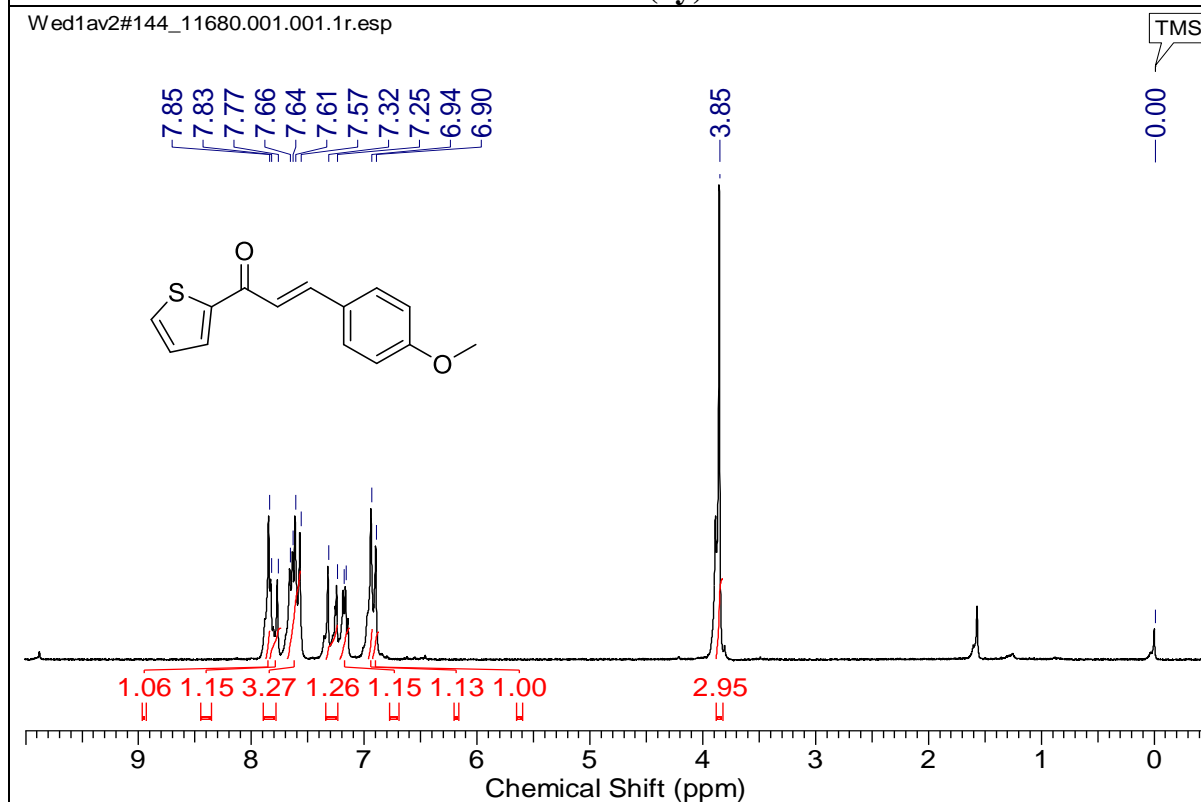

**Figure S63.**  $^1\text{H}$  NMR of (E)-3-(4-methoxyphenyl)-1-(thiophen-2-yl)prop-2-en-1-one (**1z**)

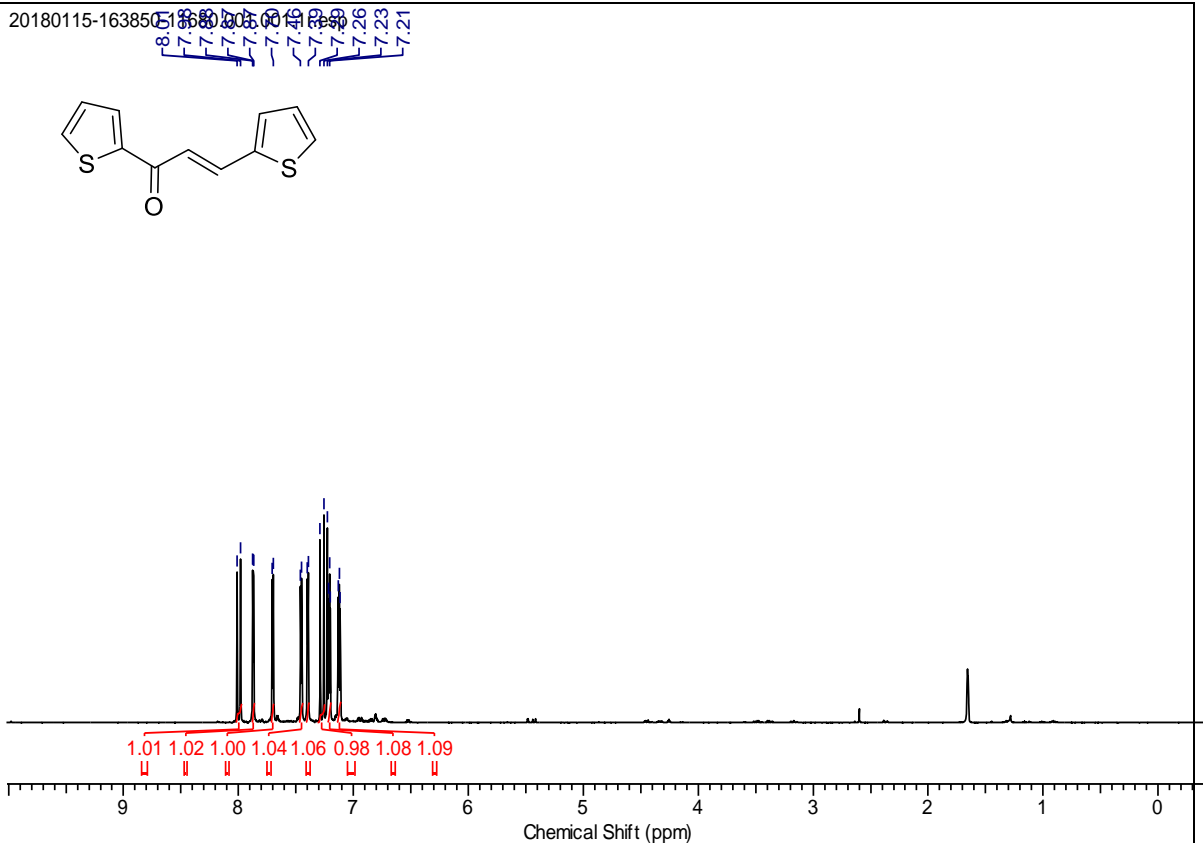

**Figure S64.**  $^1\text{H}$  NMR of (E)-1,3-di(thiophen-2-yl)prop-2-en-1-one (**1za**)

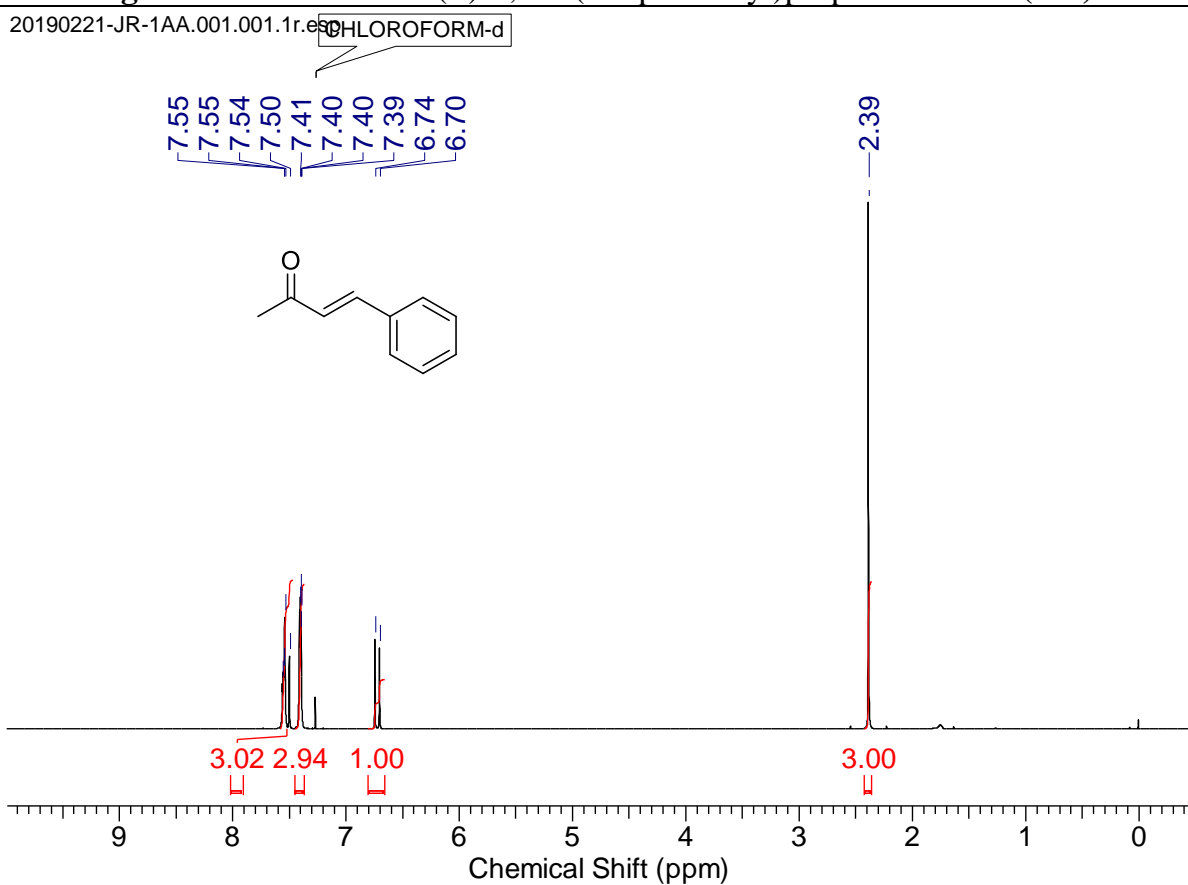

**Figure S65.**  $^1\text{H}$  NMR of (E)-4-phenylbut-3-en-2-one (**1aa**)

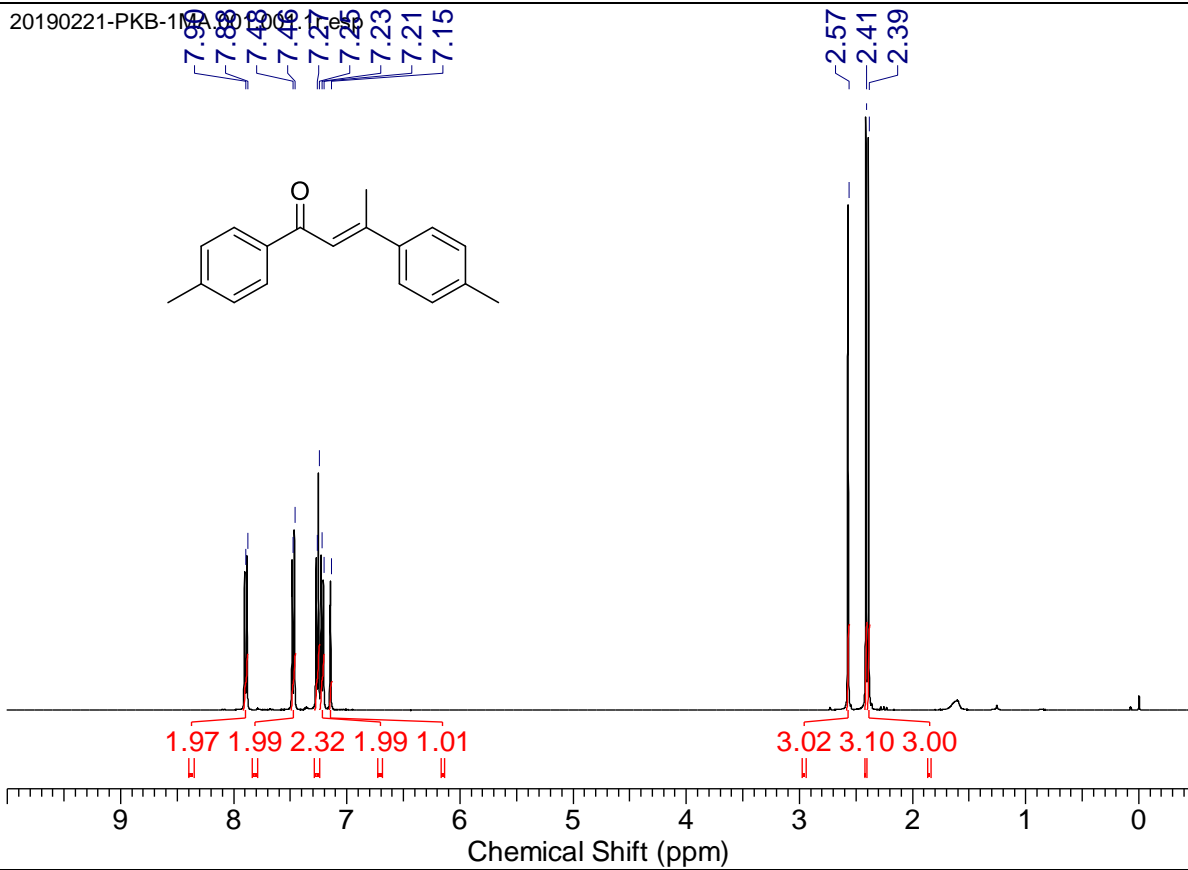

**Figure S66.**  $^1\text{H}$  NMR of (E)-1,3-di-p-tolylbut-2-en-1-one (**1ma**)

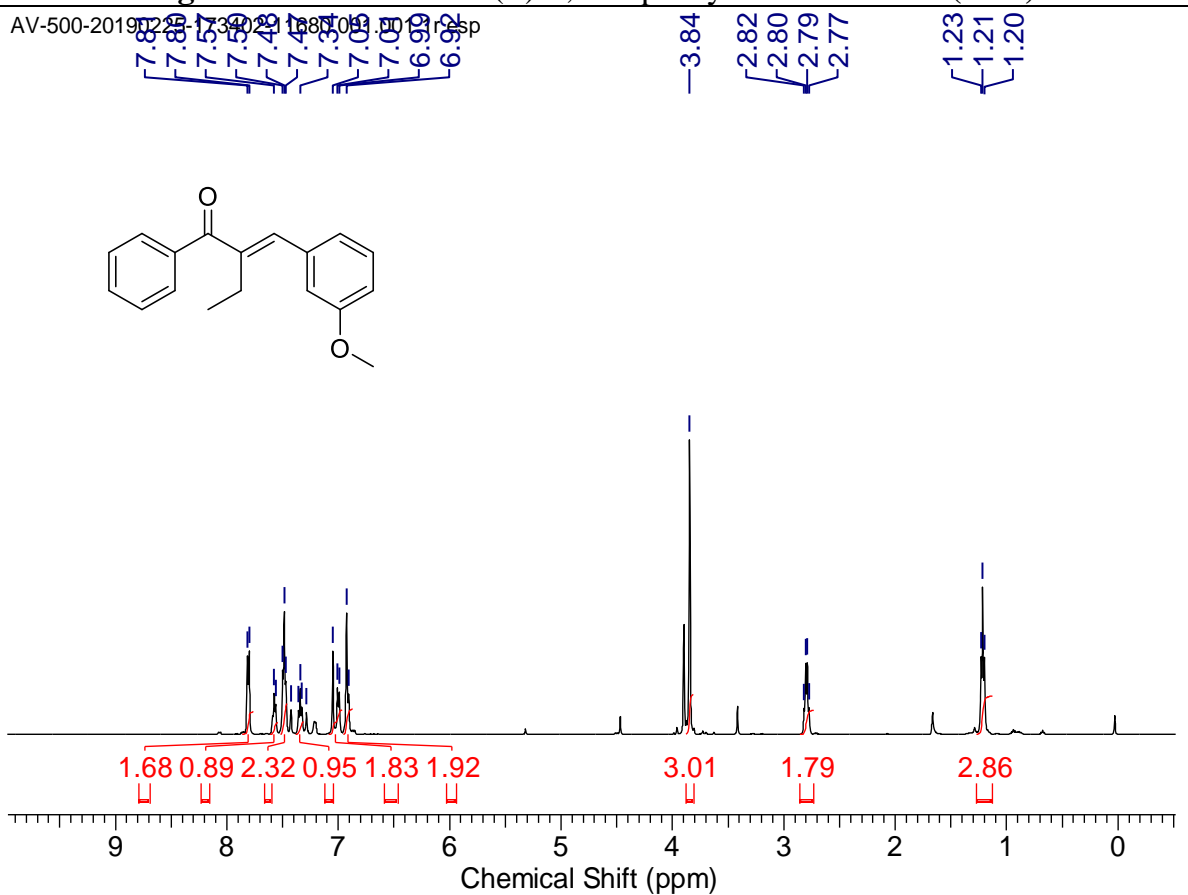

**Figure S67.**  $^1\text{H}$  NMR of (E)-2-(3-methoxybenzylidene)-1-phenylbutan-1-one (**1zb**)

AV-500-20190419-140027-43036.001.001.1r.68 CHLOROFORM-d

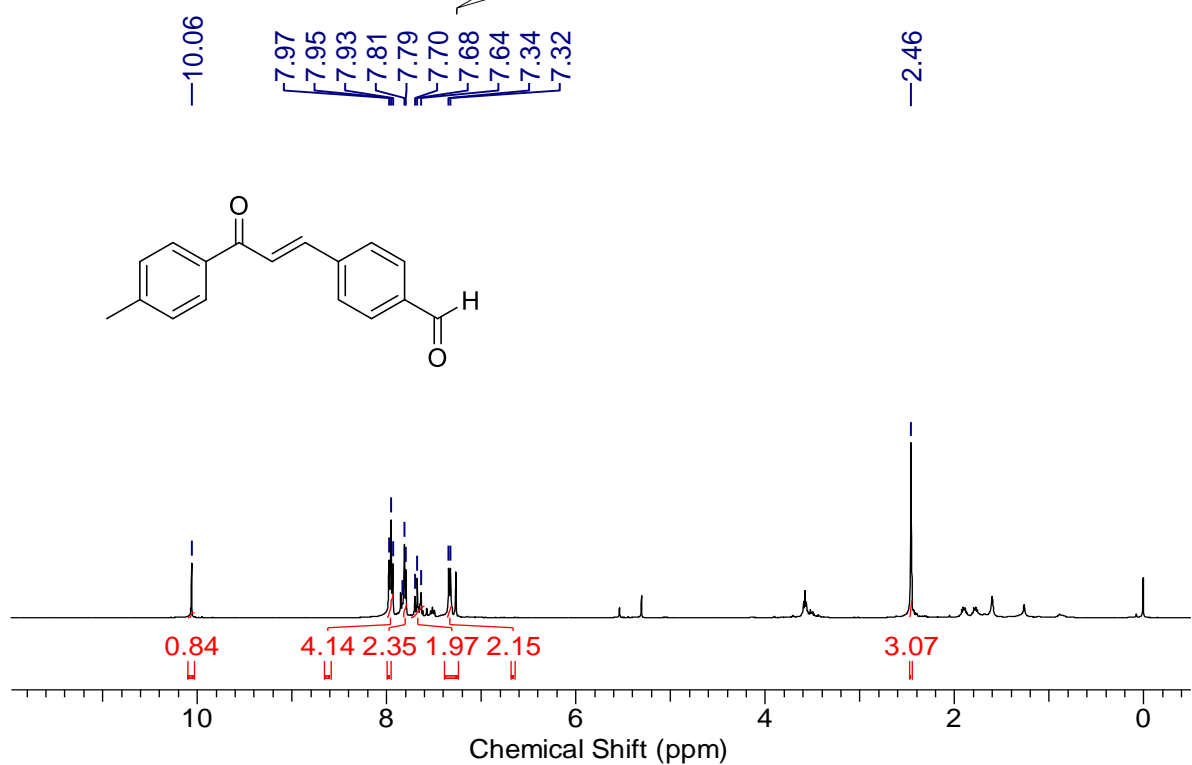

**Figure S68.** <sup>1</sup>H NMR of (E)-4-(3-oxo-3-(p-tolyl)prop-1-en-1-yl) benzaldehyde (**1zd**)
